# Supplementary material for: Dopamine Receptor Ligand Selectivity - An In Silico / In Vitro Insight
Source: Preprints.org preprint supplement (doi:10.20944/preprints202304.1069.v1), 2023-04-27
Supplement: Supplementary file 1 [file supplementary]

## Table of content – supplementary information

|                                                                                                                     |    |
|---------------------------------------------------------------------------------------------------------------------|----|
| 1. Dataset assembly .....                                                                                           | 1  |
| 2.1 Dataset of D <sub>1</sub> R-selective compounds (ChEMBL).....                                                   | 1  |
| 2.2 Dataset of D <sub>2</sub> R-selective compounds (ChEMBL).....                                                   | 3  |
| 2.3 Dataset of D <sub>2</sub> like-selective compounds (ChEMBL).....                                                | 5  |
| 2.4 Dataset of D <sub>3</sub> R-selective compounds (ChEMBL).....                                                   | 17 |
| 2. In vitro screening– overview of 2D structures and NDF values of all compounds .....                              | 24 |
| 3. In silico assessment of DR subtype selectivity – a distance-based approach.....                                  | 31 |
| 3.1. <i>ChEMBL validation</i> .....                                                                                 | 31 |
| 3.2. <i>Retrospective analysis of investigated compounds</i> .....                                                  | 31 |
| 4. In vitro careening activity of selected compounds .....                                                          | 32 |
| 4.1. <i>Summary of in vitro activity (based on NDF values) of control compounds and selected virtual hits</i> ..... | 32 |
| 4.2. <i>Summary of K<sub>i</sub> values determined in vitro – overview of DR subtype selectivity</i> .....          | 37 |
| 5. In silico insights into the DR binding pockets.....                                                              | 38 |

## 1. Dataset assembly

### 2.1 Dataset of D<sub>1</sub>R-selective compounds (ChEMBL)

**Table S1.** D<sub>1</sub>R-selective compounds extracted from ChEMBL with in vitro determined biological activities for all investigated DR subtypes.

| ID   | SMILES                                                                                                                                                                                                       | K <sub>i</sub> [nM] <sup>a</sup> |                  |                  | Ref  |
|------|--------------------------------------------------------------------------------------------------------------------------------------------------------------------------------------------------------------|----------------------------------|------------------|------------------|------|
|      |                                                                                                                                                                                                              | D <sub>1</sub> R                 | D <sub>2</sub> R | D <sub>3</sub> R |      |
| SC1  | <chem>O=C(C=1C([H])=C([H])C([F])=C([H])C=1[H])N([H])C([H])([H])C([H])([H])N2C([H])([H])C([H])([H])N(C([H])([H])C2([H])[H])[C@@]4([H])C=3C([H])=C([H])C([H])=C([H])C=3C([H])([H])C([H])([H])C4([H])[H]</chem> | 70                               | 3090             | 1570             | [46] |
| SC2  | <chem>N#CC=1C([H])=C([H])C2=C(C=1[H])C(=C([H])N2[H])C([H])([H])N4C([H])([H])C([H])([H])N(C=3C([H])=C([H])C([Cl])=C([H])C=3[H])C([H])([H])C4([H])[H]</chem>                                                   | 550                              | 4300             | 6400             | [47] |
| SC3  | <chem>N#CC=2C([H])=C([H])C=1C([H])=C(N([H])C=1C=2[H])C([H])([H])N4C([H])([H])C([H])([H])N(C=3C([H])=C([H])C([Cl])=C([Cl])C=3[H])C([H])([H])C4([H])[H]</chem>                                                 | 880                              | 2000             | 33000            |      |
| SC4  | <chem>[Br]C=1C([H])=C([H])C(OC([H])([H])[H])=C(C=1[H])C2=N[C@]([H])([C@]([H])(O2)C([H])([H])[H])C([H])([H])N4C([H])([H])C([H])([H])N(C=3C([H])=C([H])C([H])=C([H])C=3[H])C([H])([H])C4([H])[H]</chem>        | 480                              | 21000            | 10000            | [48] |
| SC5  | <chem>[Cl]C=1C([H])=C([H])C(=C([H])C=1[H])N2C([H])([H])C([H])([H])N(C([H])([H])C2([H])[H])C([H])([H])C=3C([H])=NN4C=3C([H])=C([H])C([H])=C4C#C[H]</chem>                                                     | 810                              | 3700             | 4600             | [49] |
| SC6  | <chem>[H]C=1C([H])=C([H])C(=C([H])C=1[H])C([H])([H])C=2C([H])=C([H])C([H])=C([H])C=2OC([H])([H])C([H])([H])N(C([H])([H])[H])C([H])([H])[H]</chem>                                                            | 343                              | 2740             | 10000            |      |
| SC7  | <chem>[H]C=1C([H])=C([H])C(=C([H])C=1[H])C([H])([H])C=2C([H])=C([H])C([H])=C([H])C=2OC([H])([H])C([H])([H])C([H])([H])N3C([H])([H])C([H])([H])C3([H])[H]</chem>                                              | 113                              | 1006             | 2923             |      |
| SC8  | <chem>[H]C=1C([H])=C([H])C(=C([H])C=1[H])C([H])([H])C=2C([H])=C([H])C([H])=C([H])C=2OC([H])([H])C([H])([H])N3C([H])([H])C([H])([H])C([H])([H])C3([H])[H]</chem>                                              | 33.7                             | 1015             | 7804             | [50] |
| SC9  | <chem>[H]C=1C([H])=C([H])C(=C([H])C=1[H])C([H])([H])C=2C([H])=C([H])C([H])=C([H])C=2OC([H])([H])C([H])([H])N3C([H])([H])C([H])([H])OC([H])([H])C3([H])[H]</chem>                                             | 201                              | 10000            | 10000            |      |
| SC10 | <chem>[H]C=1C([H])=C([H])C(=C([H])C=1[H])C([H])([H])C=2C([H])=C([H])C([H])=C([H])C=2OC([H])([H])C([H])([H])N3C([H])([H])C([H])([H])C([H])([H])C3([H])[H]</chem>                                              | 379                              | 10000            | 1818             |      |
| SC11 | <chem>O=C2C1=C(C([H])=C([Cl])C([H])=C1[Cl])N([H])C(=O)[C@@]2(C=4C([H])=C([H])C([H])=C(OC([H])([H])C=3C([H])=C([H])C([H])=C([H])C=3[H])C=4[H])C([H])([H])[H]</chem>                                           | 120                              | 10000            | 10000            | [51] |
| SC12 | <chem>[H]C=1C([H])=C([H])C3=C(C=1[H])C([H])([H])C=2C([H])=C(OC([H])([H])[H])C([H])=C([H])C=2C([H])([H])C([H])([H])N(C([H])([H])C([H])([H])C3([H])[H])C([H])([H])[H]</chem>                                   | 137                              | 1396             | 23903            | [52] |
| SC13 | <chem>[H]C=1C([H])=C([H])C3=C(C=1[H])C([H])([H])C2=C([H])C(OC([H])([H])[H])=C(OC([H])([H])[H])C([H])=C2C([H])([H])C([H])([H])N(C([H])([H])C([H])([H])C3([H])[H])C([H])([H])[H]</chem>                        | 579                              | 1028             | 14830            |      |
| SC14 | <chem>O=C1C3=C(N=C(N1C([H])([H])[H])N2C([H])([H])C([H])([H])OC([H])([H])C2([H])[H])C(=C([H])N3[H])C([H])([H])N5C([H])([H])C([H]</chem>                                                                       | 520                              | 1100             | 2700             | [53] |

| ID   | SMILES                                                                                                                                                                                                       | K <sub>i</sub> [nM] <sup>a</sup> |                  |                  | Ref  |
|------|--------------------------------------------------------------------------------------------------------------------------------------------------------------------------------------------------------------|----------------------------------|------------------|------------------|------|
|      |                                                                                                                                                                                                              | D <sub>1</sub> R                 | D <sub>2</sub> R | D <sub>3</sub> R |      |
|      | <chem>)]([H])N(C=4C([H])=C([H])C([H])=C([H])C=4[H])C([H])([H])C5([H])</chem>                                                                                                                                 |                                  |                  |                  |      |
| SC15 | <chem>O=C(C=1C([H])=C([H])C([F])=C([H])C=1[H])C([H])([H])C([H])([H])C([H])([H])N5[C@@]3([H])[C@]7([H])[C@@]2([H])C([H])([H])[C@]6([H])[C@]4([H])[C@@]2([H])[C@@]3([H])[C@]4([H])[C@@]5(O[H])[C@]67[H]</chem> | 209                              | 1724             | 1958             | [54] |
| SC16 | <chem>[H]C=1C([H])=C([H])C2=C(C=1[H])C4=C(N2[H])C([H])([H])C=3C([H])=C([H])C([H])=C([H])C=3C([H])([H])C([H])([H])N([C@@]([H])C4([H])[H])C([H])([H])[H]</chem>                                                | 640                              | 10000            | 10000            | [55] |
| SC17 | <chem>[H]C=1C([H])=C([H])C2=C(C=1[H])C4=C(N2[H])C([H])([H])C=3C([H])=C([H])C([H])=C([H])C=3C([H])([H])N([C@@]([H])C4([H])[H])C([H])([H])O[H]C([H])([H])[H]</chem>                                            | 114                              | 2923             | 4676             |      |
| SC18 | <chem>O=C2C=1C([H])=C([H])C([H])=C([H])C=1C([H])([H])[C@@]2([H])C([H])([H])C([H])([H])N4C([H])([H])C([H])([H])N(C=3C([H])=C([H])C([Cl])=C([H])C=3[H])C([H])([H])C4([H])[H]</chem>                            | 389.05                           | 10000            | 4534             | [56] |
| SC19 | <chem>[Cl]C=1C([H])=C([H])C(=C([H])C=1[H])N2C([H])([H])C([H])([H])C([H])([H])N(C([H])([H])C2([H])[H])C([H])([H])C([H])([H])C([H])([H])C=4OC=3C([H])=C([H])C([H])=C([H])C=3C=4[H]</chem>                      | 274                              | 2507             | 1462             |      |
| SC20 | <chem>[H]C=1C([H])=C([H])C(=C([H])C=1[H])[C@@]3([H])C=2C([H])=C(O[H])C([H])=C([H])C=2C([H])([H])C([H])([H])N(C3([H])[H])C([H])([H])[H]</chem>                                                                | 207                              | 1000             | 1000             |      |
| SC21 | <chem>[H]C=1C([H])=C([H])C(=C([H])C=1[H])[C@@]3([H])C=2C([H])=C(O[H])C(=C([H])C=2C([H])([H])C([H])([H])N(C3([H])[H])C([H])([H])[H])N([H])[H]</chem>                                                          | 334                              | 1000             | 1000             | [57] |
| SC22 | <chem>[H]C=1C([H])=C([H])C(=C([H])C=1[H])[C@]3([H])C2=C([H])C(O[H])=C(C([H])=C2C([H])([H])C([H])([H])N(C3([H])[H])C([H])([H])[H])C4=C([H])C([H])=C([H])C(=C4[H])C([H])([H])[H]</chem>                        | 216                              | 1000             | 1000             |      |
| SC23 | <chem>[H]C=1C([H])=C([H])C(=C([H])C=1[H])[C@@]3([H])C=2C([H])=C(O[H])C(=C([H])C=2C([H])([H])C([H])([H])N(C3([H])[H])C([H])([H])[H])C=4C([H])=C([H])C(O[H])=C([H])C=4[H]</chem>                               | 349                              | 1000             | 1000             |      |
| SC24 | <chem>[H]/C4=C3\C1=C2/C(=C(/[H])C(OC([H])([H])[H])=C1OC([H])([H])[H])C([H])([H])C([H])([H])N([C@@]2([H])C([H])([H])C3=C([H])C(O[H])=C4OC([H])([H])[H])C([H])([H])[H]</chem>                                  | 373                              | inactive         | >950             | [58] |
| SC25 | <chem>[H]/C1=C(\[H])C(OC([H])([H])[H])=C(OC([H])([H])[H])C4=C1C([H])([H])[C@@]3([H])C2=C([H])C(OC([H])([H])[H])=C(OC([H])([H])[H])C([H])=C2C([H])([H])C([H])([H])N3C4([H])[H]</chem>                         | 153                              | 1125             | 1371             | [59] |
| SC26 | <chem>[H]/C3=C(\[H])C(O/C2=N/C([H])=C([H])C=1OC([H])=C([H])C=12)=C([H])C(=C3/C5=C(/N=C(/[H])C4=NC([H])=C([H])N45)C([H])([H])[H])C([H])([H])[H]</chem>                                                        | 110                              | 8300             | 7900             |      |
| SC27 | <chem>[F]C([F])([F])C=3C([H])=C(O/C2=N/C([H])=C([H])C=1C([H])=C([H])[S]C=12)C([H])=C([H])C=3/C5=C(\[H])C([H])=C([H])C4=NC([H])=C([H])N45</chem>                                                              | 130                              | 8700             | 6200             | [60] |
| SC28 | <chem>[F]C([F])([F])C=3C([H])=C(O/C2=N/C([H])=C([H])C=1OC([H])=C([H])C=12)C([H])=C([H])C=3/C5=C(\[H])C([H])=C([H])C4=NC([H])=C([H])N45</chem>                                                                | 150                              | 7600             | 10000            |      |



| ID   | SMILES                                                                                                                                                                                                                                                         | K <sub>i</sub> [nM] <sup>a</sup> |                  |                  | Ref. |
|------|----------------------------------------------------------------------------------------------------------------------------------------------------------------------------------------------------------------------------------------------------------------|----------------------------------|------------------|------------------|------|
|      |                                                                                                                                                                                                                                                                | D <sub>1</sub> R                 | D <sub>2</sub> R | D <sub>3</sub> R |      |
| SC40 | <chem>[H]C=1C([H])=C([H])C(OC([H])([H])[H])=C(C=1[H])N2C([H])([H])C([H])([H])N(C([H])([H])C2([H])[H])C([H])([H])C=4N=C3C([H])=C([H])C([H])=C(N3C=4[H])N5/N=C(/[H])C([H])=C5[H]</chem>                                                                          | 27000                            | 590              | 1000             |      |
| SC41 | <chem>[H]C=1C([H])=C([H])C(OC([H])([H])[H])=C(C=1[H])N2C([H])([H])C([H])([H])N(C([H])([H])C2([H])[H])C([H])([H])C=4N=C3C([H])=C([H])C([H])=C([H])N3C=4[H]</chem>                                                                                               | 20000                            | 990              | 3900             |      |
| SC42 | <chem>[Cl]/C2=N/N1C([H])=C(N=C1C([H])=C2[H])C([H])([H])N4C([H])([H])C([H])([H])N(C=3C([H])=C([H])C([H])=C([H])C=3OC([H])([H])[H])C([H])([H])C4([H])[H]</chem>                                                                                                  | 7700                             | 96               | 1400             |      |
| SC43 | <chem>[F]C([H])([H])C([H])([H])OC=1C([H])=C([H])C([H])=C(C=1[H])C([H])([H])N3C([H])([H])C([H])([H])N(C=2C([H])=C([H])C([Cl])=C([H])C=2[H])C([H])([H])C3([H])[H]</chem>                                                                                         | 5100                             | 590              | 1100             |      |
| SC44 | <chem>[F]C([H])([H])C([H])([H])OC=1C([H])=C([H])C=C([H])C=1OC([H])([H])[H]C([H])([H])N3C([H])([H])C([H])([H])N(C=2C([H])=C([H])C([H])=C([H])C=2OC([H])([H])[H])C([H])([H])C3([H])[H]</chem>                                                                    | 5400                             | 310              | 1100             | [67] |
| SC45 | <chem>[F]C([H])([H])C([H])([H])O/C1=C(\[H])C(OC([H])([H])[H])=C(O C([H])([H])[H])C([H])=C1C([H])([H])N3C([H])([H])C([H])([H])N(C=2C([H])=C([H])C([Cl])=C([H])C=2[H])C([H])([H])C3([H])[H]</chem>                                                               | 3500                             | 760              | 3900             |      |
| SC46 | <chem>O=C1N([H])C([H])([H])C([H])([H])N1C([H])([H])C([H])([H])N6C([H])([H])C([H])([H])C([H])(C2=C([H])N(C=3C([H])=C([H])C=C([H])C2=3)C=4/N=C(/[H])N(N=4)C([H])([H])[H])C=5C([H])=C([H])C([F])=C([H])C=5[H])C([H])([H])C6([H])[H]</chem>                        | 4100                             | 660              | 2900             |      |
| SC47 | <chem>O=C1N(C([H])([H])C([H])([H])[C@]1([H])C([H])([H])C([H])([H])N6C([H])([H])C([H])([H])[C@@]([H])(C2=C([H])N(C=3C([H])=C([H])C=C([H])C2=3)C=4/N=C(/[H])N(N=4)C([H])([H])[H])C=5C([H])=C([H])C([F])=C([H])C=5[H])C([H])([H])C6([H])[H])C([H])([H])[H]</chem> | 2600                             | 190              | 1400             | [68] |
| SC48 | <chem>[Br]C=1C([H])=C([H])C(OC([H])([H])[H])=C(C=1[H])C2=N/C=C(/[H])[S]2)C([H])([H])N4C([H])([H])C([H])([H])N(C=3C([H])=C([H])C([H])=C([H])C=3[H])C([H])([H])C4([H])[H]</chem>                                                                                 | 6400                             | 190              | 20000            | [53] |
| SC49 | <chem>[H]C=3C([H])=C2C1=C(/N=C(/O[H])N1C([H])([H])[C@]([H])(N(C([H])([H])[H])C([H])([H])[H])C2([H])[H])C=3[H]</chem>                                                                                                                                           | 5000                             | 20               | 10000            | [69] |
| SC50 | <chem>[F]C([H])([H])C([H])([H])C([H])([H])OC=1C([H])=C([H])C=C([H])C=1[H])N2N=N/C=C2/[H])C([H])([H])N4C([H])([H])C([H])([H])N(C=3C([H])=C([H])C([H])=C([H])C=3OC([H])([H])[H])C([H])([H])C4([H])[H]</chem>                                                     | 38000                            | 340              | 2800             |      |
| SC51 | <chem>[F]C([H])([H])C([H])([H])OC([H])([H])C([H])([H])C([H])([H])OC=1C([H])=C([H])C=C([H])C=1[H])N2N=N/C=C2/[H])C([H])([H])N4C([H])([H])C([H])([H])N(C=3C([H])=C([H])C([H])=C([H])C=3OC([H])([H])[H])C([H])([H])C4([H])[H]</chem>                              | 3600                             | 440              | 2900             | [70] |
| SC52 | <chem>O=C(C=1C([H])=C([H])C([F])=C([H])C=1[H])C([H])([H])C([H])([H])C(O)N3C([H])([H])C([H])([H])C(O[H])(C=2C([H])=C([H])C([Cl])=C([H])C=2[H])C([H])([H])C3([H])[H]</chem>                                                                                      | 19000                            | 860              | 1700             | [71] |
| SC53 | <chem>[H]C=1C([H])=C([H])C2=C(C=1[H])C([H])([H])C([H])(C2([H])[H])C([H])([H])N5C([H])([H])C([H])([H])N(C=4C([H])=C([H])C=3OC([H])([H])C([H])([H])OC=3C=4[H])C([H])([H])C5([H])[H]</chem>                                                                       | 3000                             | 738              | 2840             | [72] |

| ID   | SMILES                                                                                                                                                    | K <sub>i</sub> [nM] <sup>a</sup> |                  |                  | Ref. |
|------|-----------------------------------------------------------------------------------------------------------------------------------------------------------|----------------------------------|------------------|------------------|------|
|      |                                                                                                                                                           | D <sub>1</sub> R                 | D <sub>2</sub> R | D <sub>3</sub> R |      |
| SC54 | <chem>[Cl]C=1C([H])=C([H])C(=C([H])C=1[H])N2C([H])([H])C([H])([H])N(C([H])([H])C2([H])[H])C([H])([H])C3=C([H])N([H])C=4/N=C(/[H])C([H])=C([H])C3=4</chem> | 10000                            | 960              | 2310             |      |

<sup>a</sup>All K<sub>i</sub> values retrieved from ChEMBL were determined in vitro utilizing radio-ligand binding assays.

### 2.3 Dataset of D<sub>2</sub>-like-selective compounds (ChEMBL)

**Table S3.** D<sub>2</sub>-like-selective compounds extracted from ChEMBL with in vitro determined biological activities for all investigated DR subtypes.

| ID   | SMILES                                                                                                                                                                                                                                      | K <sub>i</sub> [nM] <sup>a</sup> |                  |                  | Ref. |
|------|---------------------------------------------------------------------------------------------------------------------------------------------------------------------------------------------------------------------------------------------|----------------------------------|------------------|------------------|------|
|      |                                                                                                                                                                                                                                             | D <sub>1</sub> R                 | D <sub>2</sub> R | D <sub>3</sub> R |      |
| SC55 | <chem>[H]C=1C([H])=C([H])C(=C([H])C=1[H])C2=C([H])C([H])([H])N(C([H])([H])C2([H])[H])C([H])([H])C([H])([H])C#CC=3C([H])=C([H])C([H])=NC=3[H]</chem>                                                                                         | 5004                             | 3.3              | 20               |      |
| SC56 | <chem>[H]C=1C([H])=C([H])C(=C([H])C=1[H])C2=C([H])C([H])([H])N(C([H])([H])C2([H])[H])C([H])([H])C([H])([H])C#CC=3C([H])=C([H])C(=C([H])C=3[H])N([H])[H]</chem>                                                                              | 10000                            | 0.67             | 24               | [73] |
| SC57 | <chem>[H]C=1C([H])=C([H])C(=C([H])C=1[H])C2=C([H])C([H])([H])N(C([H])([H])C2([H])[H])C([H])([H])C([H])([H])C#CC=3C([H])=C([H])C(=NC=3[H])N([H])[H]</chem>                                                                                   | 10000                            | 19               | 7                |      |
| SC58 | <chem>[H]C=1C([H])=C([H])C(=C([H])C=1[H])C2=C([H])C([H])([H])N(C([H])([H])C2([H])[H])C([H])([H])C([H])([H])C#C/C3=N/C([H])=C(C([H])=C3[H])N([H])[H]</chem>                                                                                  | 10000                            | 1.9              | 2.6              |      |
| SC59 | <chem>O=C(C=3C([H])=C([H])C=2C=1C([H])=C([H])C([H])=C([H])C=1C([H])([H])C=2C=3[H])N([H])C([H])([H])C([H])([H])C([H])([H])C([H])([H])C([H])([H])N5C([H])([H])C([H])([H])N(C=4C([H])=C([H])C([H])=C([Cl])C=4[Cl])C([H])([H])C5([H])[H]</chem> | 10000                            | 217              | 1.4              | [74] |
| SC60 | <chem>O=C(C=3C([H])=C([H])C=2C=1C([H])=C([H])C([H])=C([H])C=1C=2C=3[H])N([H])C([H])([H])C([H])([H])C([H])([H])C([H])([H])C([H])([H])N5C([H])([H])C([H])([H])N(C=4C([H])=C([H])C([H])=C([Cl])C=4[Cl])C([H])([H])C5([H])[H]</chem>            | 10000                            | 262              | 0.9              |      |
| SC61 | <chem>[Cl]C=2C([H])=C([H])C=1OC([H])([H])[C@@]([H])(OC=1C=2[H])C([H])([H])N([H])C([H])([H])[C@@]4([H])C([H])([H])C([H])([H])N(C=3C([H])=C([H])C([H])=C([H])C=3OC([H])([H])[H])C([H])([H])C4([H])[H]</chem>                                  | 1000                             | 13.2             | 1.6              | [75] |
| SC62 | <chem>[Cl]C=1C([H])=C([H])C(=C([H])C=1[H])[C@@]3(O[H])C([H])([H])[C@@]2([H])N([C@]([H])(C([H])([H])C2([H])[H])C3([H])[H])C([H])([H])C4=C([H])N([H])C=5C([H])=C([H])C([H])=C([H])C4=5</chem>                                                 | 1220                             | 33.4             | 15.5             |      |
| SC63 | <chem>[Cl]C=1C([H])=C([H])C(=C([H])C=1[H])[C@@]3(O[H])C([H])([H])[C@@]2([H])N([C@]([H])(C([H])([H])C2([H])[H])C3([H])[H])C([H])([H])C4=C([H])[S]C=5C([H])=C([H])C([H])=C([H])C4=5</chem>                                                    | 3000                             | 12.9             | 3.62             | [76] |
| SC64 | <chem>[Cl]C=1C([H])=C([H])C(=C([H])C=1[H])[C@@]3(O[H])C([H])([H])[C@@]2([H])N([C@]([H])(C([H])([H])C2([H])[H])C3([H])[H])C([H])([H])C4=C([H])OC=5C([H])=C([H])C([H])=C([H])C4=5</chem>                                                      | 3930                             | 1.06             | 0.71             |      |
| SC65 | <chem>O=C1C([H])=NN(C(=O)N1C([H])([H])[H])C([H])([H])C([H])([H])C([H])([H])C([H])([H])C([H])([H])N4C([H])([H])C([H])([H])N(/C3=C([H])C([H])=C([H])C=2C([H])=C([H])C(OC([H])([H])[H])=C([H])C=23)C([H])([H])C4([H])[H]</chem>                | 7396                             | 22.01            | 62.8             | [77] |

| ID   | SMILES                                                                                                                                                                                                                                                            | K <sub>i</sub> [nM] <sup>a</sup> |                  |                  | Ref. |
|------|-------------------------------------------------------------------------------------------------------------------------------------------------------------------------------------------------------------------------------------------------------------------|----------------------------------|------------------|------------------|------|
|      |                                                                                                                                                                                                                                                                   | D <sub>1</sub> R                 | D <sub>2</sub> R | D <sub>3</sub> R |      |
| SC66 | <chem>O=C(C=1C([H])=C3C([H])=C([H])C=1C([H])([H])C([H])([H])C=2C([H])=C([H])C(=C([H])C=2[H])C([H])([H])C3([H])[H])N([H])C([H])([H])C([H])([H])C([H])([H])C([H])([H])N5C([H])([H])C([H])([H])N(C=4C([H])=C([H])C([H])=C([Cl])C=4[Cl])C([H])([H])C5([H])[H])</chem> | 2800                             | 220              | 3.6              | [78] |
| SC67 | <chem>O=C(C=2OC=1C([H])=C([H])C([H])=C([H])C=1C=2[H])N([H])C([H])([H])C([H])([H])C([H])([H])C([H])([H])N4C([H])([H])C([H])([H])N(C=3C([H])=C([H])C([H])=C([H])C=3OC([H])([H])[H])C([H])([H])C4([H])[H])</chem>                                                    | 2000                             | 36.5             | 0.92             |      |
| SC68 | <chem>O=C(C=2OC=1C([H])=C([H])C([H])=C([H])C=1C=2[H])N([H])C([H])([H])C([H])([H])C([H])([H])C([H])([H])N4C([H])([H])C([H])([H])N(C=3C([H])=C([H])C([H])=C([Cl])C=3[Cl])C([H])([H])C4([H])[H])</chem>                                                              | 2100                             | 44.8             | 0.81             |      |
| SC69 | <chem>O=C(/C2=C([H])C=1C([H])=C([H])C([H])=C([H])C=1N2[H])N([H])C([H])([H])C([H])([H])[C@@]([H])(O[H])C([H])([H])N4C([H])([H])C([H])([H])N(C=3C([H])=C([H])C([H])=C([Cl])C=3[Cl])C([H])([H])C4([H])[H])</chem>                                                    | 4630                             | 502              | 1.39             |      |
| SC70 | <chem>O=C(/C2=C([H])C=1C([H])=C([H])C([H])=C([H])C=1N2[H])N([H])C([H])([H])C([H])([H])[C@@]([H])(O[H])C([H])([H])N4C([H])([H])C([H])([H])N(C=3C([H])=C([H])C([H])=C([Cl])C=3[Cl])C([H])([H])C4([H])[H])</chem>                                                    | 10000                            | 433              | 1.12             |      |
| SC71 | <chem>O=C(/C2=C([H])C=1C([H])=C([H])C([H])=C([H])C=1N2[H])N([H])C([H])([H])C([H])([H])[C@]([H])(O[H])C([H])([H])N4C([H])([H])C([H])([H])N(C=3C([H])=C([H])C([H])=C([Cl])C=3[Cl])C([H])([H])C4([H])[H])</chem>                                                     | 10000                            | 715              | 16.6             |      |
| SC72 | <chem>O=C(/C2=C([H])C=1C([H])=C([H])C([H])=C([H])C=1N2[H])N([H])C([H])([H])C([H])([H])[C@@]([H])(O[H])C([H])([H])N4C([H])([H])C([H])([H])N(C=3C([H])=C([H])C([H])=C([H])C=3OC([H])([H])[H])C([H])([H])C4([H])[H])</chem>                                          | 10000                            | 249              | 1.4              | [79] |
| SC73 | <chem>O=C(/C2=C([H])C=1C([H])=C([H])C([H])=C([H])C=1N2[H])N([H])C([H])([H])C([H])([H])[C@@]([H])(O[H])C([H])([H])N4C([H])([H])C([H])([H])N(C=3C([H])=C([H])C([H])=C([H])C=3OC([H])([H])C([H])([H])C([H])([H])C4([H])[H])</chem>                                   | 4960                             | 47.1             | 62.1             |      |
| SC74 | <chem>O=C(/C2=C([H])C=1C([H])=C([F])C([H])=C([H])C=1N2[H])N([H])C([H])([H])C([H])([H])[C@]([H])(O[H])C([H])([H])N4C([H])([H])C([H])([H])N(C=3C([H])=C([H])C([H])=C([Cl])C=3[Cl])C([H])([H])C4([H])[H])</chem>                                                     | 10000                            | 293              | 1.61             |      |
| SC75 | <chem>O=C(/C2=C([H])C=1C([H])=C([F])C([H])=C([H])C=1N2[H])N([H])C([H])([H])C([H])([H])[C@@]([H])(O[H])C([H])([H])N4C([H])([H])C([H])([H])N(C=3C([H])=C([H])C([H])=C([H])C=3OC([H])([H])[H])C([H])([H])C4([H])[H])</chem>                                          | 5060                             | 244              | 2.41             |      |
| SC76 | <chem>O=C(/C2=C([H])C=1C([H])=C([I])C([H])=C([H])C=1N2[H])N([H])C([H])([H])C([H])([H])[C@@]([H])(O[H])C([H])([H])N4C([H])([H])C([H])([H])N(C=3C([H])=C([H])C([H])=C([H])C=3OC([H])([H])[H])C([H])([H])C4([H])[H])</chem>                                          | 10000                            | 520              | 3.6              |      |
| SC77 | <chem>O=C(/C2=C([H])C=1C([H])=C(OC([H])([H])[H])C([H])=C([H])C=1N2[H])N([H])C([H])([H])C([H])([H])[C@@]([H])(O[H])C([H])([H])N4C([H])([H])C([H])([H])N(C=3C([H])=C([H])C([H])=C([Cl])C=3[Cl])C([H])([H])C4([H])[H])</chem>                                        | 10000                            | 489              | 1.2              |      |

| ID   | SMILES                                                                                                                                                                                                                                             | K <sub>i</sub> [nM] <sup>a</sup> |                  |                  | Ref. |
|------|----------------------------------------------------------------------------------------------------------------------------------------------------------------------------------------------------------------------------------------------------|----------------------------------|------------------|------------------|------|
|      |                                                                                                                                                                                                                                                    | D <sub>1</sub> R                 | D <sub>2</sub> R | D <sub>3</sub> R |      |
| SC78 | <chem>O=C(/C2=C(\ [H])C=1C([H])=C(OC([H])([H])[H])C([H])=C([H])C=1N2[H])N([H])C([H])([H])C([H])([H])[C@@]([H])(O[H])C([H])([H])N4C([H])([H])C([H])([H])N(C=3C([H])=C([H])C([H])=C([H])C=3OC([H])([H])[H])C4([H])[H]</chem>                         | 10000                            | 390              | 2.32             |      |
| SC79 | <chem>O=C(C=2OC=1C([H])=C([H])C([H])=C([H])C=1C=2[H])N([H])C([H])([H])C([H])([H])[C@@]([H])(O[H])C([H])([H])N4C([H])([H])C([H])([H])N(C=3C([H])=C([H])C([H])=C([Cl])C=3[Cl])C([H])([H])C4([H])[H]</chem>                                           | 10000                            | 622              | 6.11             |      |
| SC80 | <chem>O=C(C=2OC=1C([H])=C([H])C([H])=C([H])C=1C=2[H])N([H])C([H])([H])C([H])([H])[C@@]([H])(O[H])C([H])([H])N4C([H])([H])C([H])([H])N(C=3C([H])=C([H])C([H])=C([H])C=3OC([H])([H])[H])C4([H])[H]</chem>                                            | 10000                            | 507              | 7.51             |      |
| SC81 | <chem>O=C(C=2OC=1C([H])=C([H])C([H])=C([H])C=1C=2[H])N([H])C([H])([H])C([H])([H])[C@]([H])(O[H])C([H])([H])N4C([H])([H])C([H])([H])N(C=3C([H])=C([H])C([H])=C([Cl])C=3[Cl])C([H])([H])C4([H])[H]</chem>                                            | 10000                            | 581              | 7.71             |      |
| SC82 | <chem>O=C(C=2OC=1C([H])=C([H])C([H])=C([H])C=1C=2[H])N([H])C([H])([H])C([H])([H])[C@@]([H])(O[H])C([H])([H])N4C([H])([H])C([H])([H])N(C=3C([H])=C([H])C([H])=C([H])C=3OC([H])([H])[H])C4([H])[H]</chem>                                            | 3690                             | 430              | 7.5              |      |
| SC83 | <chem>O=C(C=2[S]C=1C([H])=C([H])C([H])=C([H])C=1C=2[H])N([H])C([H])([H])C([H])([H])[C@@]([H])(O[H])C([H])([H])N4C([H])([H])C([H])([H])N(C=3C([H])=C([H])C([H])=C([H])C=3OC([H])([H])[H])C4([H])[H]</chem>                                          | 6650                             | 337              | 4.6              |      |
| SC84 | <chem>O=C(/C2=C(\ [H])C=1C([H])=C([H])C([H])=C([H])C=1N2[H])N([H])C([H])([H])C([H])([H])[C@]([H])(O[H])C([H])([H])C([H])([H])N4C([H])([H])C([H])([H])N(C=3C([H])=C([H])C([H])=C([Cl])C=3[Cl])C([H])([H])C4([H])[H]</chem>                          | 10000                            | 28.4             | 0.26             |      |
| SC85 | <chem>O=C(C=2[S]C=1C([H])=C([H])C([H])=C([H])C=1C=2[H])N([H])C([H])([H])C([H])=C([H])C([H])([H])N4C([H])([H])C([H])([H])N(C=3C([H])=C([H])C([H])=C([Cl])C=3[Cl])C([H])([H])C4([H])[H]</chem>                                                       | 1730                             | 149              | 1.11             |      |
| SC86 | <chem>O=C(C=2OC=1C([H])=C([H])C([H])=C([H])C=1C=2[H])N([H])C([H])([H])C([H])=C([H])C([H])([H])N4C([H])([H])C([H])([H])N(C=3C([H])=C([H])C([H])=C([Cl])C=3[Cl])C([H])([H])C4([H])[H]</chem>                                                         | 1460                             | 76.5             | 2.11             |      |
| SC87 | <chem>O=C2C=1C([H])=C([H])C([H])=C([H])C=1C([H])([H])C([H])([H])C([H])([H])N2C([H])([H])C([H])([H])C([H])([H])C([H])([H])N4C([H])([H])C([H])([H])N(C=3C([H])=C([H])C([H])=C([Cl])C=3[Cl])C([H])([H])C4([H])[H]</chem>                              | 1737.8                           | 36.3078          | 14.45            |      |
| SC88 | <chem>O=C2C=1C([H])=C([H])C([H])=C([H])C=1C([H])([H])C([H])([H])C([H])([H])N2C([H])([H])C([H])([H])C([H])([H])C([H])([H])N4C([H])([H])C([H])([H])N(C=3C([H])=C([H])C([H])=C([H])C=3OC([H])([H])[H])C4([H])[H]</chem>                               | 2691.53                          | 3.63078          | 1.585            | [80] |
| SC89 | <chem>O=C(C=1C([H])=C3C([H])=C([H])C=1C([H])([H])C([H])([H])C=2C([H])=C([H])C=C([H])C=2[H])C([H])([H])C3([H])[H]C([H])([H])C([H])([H])C([H])([H])N5C([H])([H])C([H])([H])C(O[H])(C=4C([H])=C([H])C([Cl])=C([H])C=4[H])C([H])([H])C5([H])[H]</chem> | 9800                             | 21               | 17               | [81] |

| ID    | SMILES                                                                                                                                                                                                                                                                                                                                               | K <sub>i</sub> [nM] <sup>a</sup> |                  |                  | Ref. |
|-------|------------------------------------------------------------------------------------------------------------------------------------------------------------------------------------------------------------------------------------------------------------------------------------------------------------------------------------------------------|----------------------------------|------------------|------------------|------|
|       |                                                                                                                                                                                                                                                                                                                                                      | D <sub>1</sub> R                 | D <sub>2</sub> R | D <sub>3</sub> R |      |
| SC90  | <chem>O=C(C=2[S]C=1C([H])=C([H])C([H])=C([H])C=1C=2[H])N([H])C([H])([H])C([H])([H])C([H])([H])C([H])([H])N6C([H])([H])C([H])([H])N(C=3C([H])=C5C([H])=C([H])C=3C([H])([H])C([H])([H])C=4C([H])=C([H])C=C([H])C=4[H])C([H])([H])C5([H])[H]C([H])([H])C6([H])[H]</chem>                                                                                | 4000                             | 83               | 1.6              |      |
| SC91  | <chem>O=C(C=2[S]C=1C([H])=C([H])C([H])=C([H])C=1C=2[H])N([H])C([H])([H])C([H])([H])C([H])([H])C([H])([H])N4C([H])([H])C([H])([H])N(C=3C([H])=C(C([H])=C([H])C=3C([H])([H])[H])C([H])([H])[H]C([H])([H])C4([H])[H]</chem>                                                                                                                             | 2400                             | 84               | 2.5              |      |
| SC92  | <chem>O=C(C=1C([H])=C(C([H])=C([H])C=1C([H])([H])[H])C([H])([H])N([H])C([H])([H])C([H])([H])C([H])([H])C([H])([H])N3C([H])([H])C([H])([H])N(C=2C([H])=C([H])C([H])=C([H])C=2OC([H])([H])[H]C([H])([H])C3([H])[H]</chem>                                                                                                                              | 2100                             | 22               | 4.7              |      |
| SC93  | <chem>O=C(C([H])=C([H])C=1C([H])=C([H])C([H])=C([H])C=1[H])N([H])C([H])([H])C([H])([H])C([H])([H])C([H])([H])N3C([H])([H])C([H])([H])N(C=2C([H])=C([H])C([H])=C([H])C=2OC([H])([H])[H]C([H])([H])C3([H])[H]</chem>                                                                                                                                   | 1100                             | 27               | 0.34             | [82] |
| SC94  | <chem>[F]C([H])([H])C([H])([H])C([H])([H])OC=3C([H])=C2C1=C(C([H])=C([H])C(O[H])=C1O[H])C([H])([H])[C@]4([H])C2=C(C=3[H])C([H])([H])C([H])([H])N4C([H])([H])C([H])([H])C([H])([H])[H]</chem>                                                                                                                                                         | 5000                             | 28               | 430              |      |
| SC95  | <chem>[F]C([H])([H])C([H])([H])C([H])([H])OC=3C([H])=C2C1=C(C([H])=C([H])C([H])=C1O[H])C([H])([H])[C@]4([H])C2=C(C=3[H])C([H])([H])C([H])([H])N4C([H])([H])C([H])([H])C([H])([H])[H]</chem>                                                                                                                                                          | 5000                             | 0.54             | 100              |      |
| SC96  | <chem>[F]C([H])([H])C([H])([H])OC=3C([H])=C2C1=C(C([H])=C([H])C([H])=C1O[H])C([H])([H])[C@]4([H])C2=C(C=3[H])C([H])([H])C([H])([H])N4C([H])([H])C([H])([H])C([H])([H])[H]</chem>                                                                                                                                                                     | 5000                             | 3.5              | 410              | [69] |
| SC97  | <chem>[F]C([H])([H])C([H])([H])C([H])([H])OC=3C([H])=C2C1=C(C([H])=C([H])C([H])=C1O[H])C([H])([H])[C@]4([H])C2=C(C=3[H])C([H])([H])C([H])([H])N4C([H])([H])C([H])([H])[H]</chem>                                                                                                                                                                     | 5000                             | 3.2              | 240              |      |
| SC98  | <chem>[F]C([H])([H])C([H])([H])OC=3C([H])=C2C1=C(C([H])=C([H])C([H])=C1O[H])C([H])([H])[C@]4([H])C2=C(C=3[H])C([H])([H])C([H])([H])N4C([H])([H])C([H])([H])[H]</chem>                                                                                                                                                                                | 5000                             | 0.83             | 550              |      |
| SC99  | <chem>[H]C=1C([H])=C([H])C(OC([H])([H])[H])=C(C=1[H])N2C([H])([H])C([H])([H])N(C([H])([H])C2([H])[H])C([H])([H])C([H])([H])C([H])([H])C([H])([H])N3N=N/C(=C3/[H])C([H])([H])O/C4=C(\[H])C([H])=C([H])C7=C4/C5=C(\[H])C([H])=C([H])C6=C5[C@@([H])(N(C([H])([H])C6([H])[H])C([H])([H])C([H])([H])C([H])([H])[H])C7([H])[H]</chem>                      | 2700                             | 661              | 2.67             |      |
| SC100 | <chem>[H]C=1C([H])=C([H])C(OC([H])([H])[H])=C(C=1[H])N2C([H])([H])C([H])([H])N(C([H])([H])C2([H])[H])C([H])([H])C([H])([H])C([H])([H])C([H])([H])C=3N=NN(C=3[H])C([H])([H])C([H])([H])C([H])([H])O/C4=C(\[H])C([H])=C([H])C7=C4/C5=C(\[H])C([H])=C([H])C6=C5[C@@([H])(N(C([H])([H])C6([H])[H])C([H])([H])C([H])([H])C([H])([H])[H])C7([H])[H]</chem> | 1900                             | 206              | 8.14             | [83] |
| SC101 | <chem>[H]C=1C([H])=C([H])C(OC([H])([H])[H])=C(C=1[H])N2C([H])([H])C([H])([H])N(C([H])([H])C2([H])[H])C([H])([H])C([H])([H])C([H])([H])C([H])([H])O/C3=C(\[H])C([H])=C([H])C6=C3/C4</chem>                                                                                                                                                            | 1174                             | 174              | 189              |      |

| ID    | SMILES                                                                                                                                                                                                                                                                                                                                                                   | K <sub>i</sub> [nM] <sup>a</sup> |                  |                  | Ref. |
|-------|--------------------------------------------------------------------------------------------------------------------------------------------------------------------------------------------------------------------------------------------------------------------------------------------------------------------------------------------------------------------------|----------------------------------|------------------|------------------|------|
|       |                                                                                                                                                                                                                                                                                                                                                                          | D <sub>1</sub> R                 | D <sub>2</sub> R | D <sub>3</sub> R |      |
|       | <chem>=C(\[H])C([H])=C([H])C5=C4[C@@]([H])(N(C([H])([H])C5([H])</chem><br><chem>[H])C([H])([H])C([H])([H])C([H])([H])[H])C6([H])[H]</chem>                                                                                                                                                                                                                               |                                  |                  |                  |      |
| SC102 | <chem>[H]C=1C([H])=C([H])C(OC([H])([H])[H])=C(C=1[H])N2C([H])(</chem><br><chem>[H])C([H])([H])N(C([H])([H])C2([H])[H])C([H])([H])C([H])([H]</chem><br><chem>)C([H])([H])C([H])([H])O/C3=C(\[H])C([H])=C([H])C6=C3/C4</chem><br><chem>=C(\[H])C([H])=C([H])C5=C4[C@]([H])(N(C([H])([H])C5([H])[</chem><br><chem>H])C([H])([H])C([H])([H])C([H])([H])[H])C6([H])[H]</chem> | 1307                             | 141              | 23.4             |      |
| SC103 | <chem>[H]C=1C([H])=C([H])C(=C([H])C=1[H])[C@]2([H])N(C([H])([H]</chem><br><chem>)[C@]4([H])[C@@]2([H])[C@@]([H])(N3C([H])([H])C([H])([H])</chem><br><chem>C([H])([H])C3([H])[H])[C@]4([H])C([H])([H])O[H])C([H])([H])</chem><br><chem>C=5C([H])=C([H])C([H])=C([H])C=5[H]</chem>                                                                                         | 22000                            | 250              | 280              | [84] |
| SC104 | <chem>[H]C=1C([H])=C([H])C(=C([H])C=1[H])C([H])([H])C([H])([H])</chem><br><chem>N(C([H])([H])C([H])([H])C=2C([H])=C([H])C([H])=C(O[H])C=2</chem><br><chem>[H])C([H])([H])C([H])([H])C([H])([H])[H]</chem>                                                                                                                                                                | 10000                            | 64.4             | 21.8             |      |
| SC105 | <chem>[H]C=1C([H])=C([H])C(=C([H])C=1[H])C([H])([H])C([H])([H])</chem><br><chem>N(C([H])([H])C2([H])C([H])([H])C2([H])[H])C([H])([H])C([H])</chem><br><chem>([H])C3=C([H])C([H])=C([H])C(O[H])=C3[H]</chem>                                                                                                                                                              | 10000                            | 118              | 168              | [85] |
| SC106 | <chem>[H]C=1C([H])=C([H])C(=C([H])C=1[H])C([H])([H])C([H])([H])</chem><br><chem>N(C([H])([H])C2([H])C([H])([H])C([H])([H])C2([H])[H])C([H])</chem><br><chem>([H])C([H])([H])C3=C([H])C([H])=C([H])C(O[H])=C3[H]</chem>                                                                                                                                                   | 10000                            | 450              | 282              |      |
| SC107 | <chem>O=C1C([H])=NN(C(=O)N1C([H])([H])[H])C([H])([H])C([H])([</chem><br><chem>H])C([H])([H])C([H])([H])N3C([H])([H])C([H])([H])N(C=2C([</chem><br><chem>H])=C([H])C([H])=C([H])C=2OC([H])([H])C([H])([H])[H])C([H]</chem><br><chem>)([H])C3([H])[H]</chem>                                                                                                               | 10000                            | 37.1             | 22               | [86] |
| SC108 | <chem>[H]C=1C([H])=C([H])C(OC([H])([H])C([H])([H])[H])=C(C=1[H]</chem><br><chem>)N2C([H])([H])C([H])([H])N(C([H])([H])C2([H])[H])C([H])([H]</chem><br><chem>)C=3[S]C([H])=C([H])C=3[H]</chem>                                                                                                                                                                            | 10000                            | 162              | 112              |      |
| SC109 | <chem>[H]C=1C([H])=C([H])C(OC([H])([H])C([H])([H])[H])=C(C=1[H]</chem><br><chem>)N2C([H])([H])C([H])([H])N(C([H])([H])C2([H])[H])C([H])([H]</chem><br><chem>)C=3C([H])=C([H])C([H])=NC=3[H]</chem>                                                                                                                                                                       | 10000                            | 255              | 42               |      |
| SC110 | <chem>[Cl]C=1C([H])=C([H])C([H])=C(C=1[Cl])N2C([H])([H])C([H])([</chem><br><chem>H])N(C([H])([H])C2([H])[H])C([H])([H])C=3C([H])=C([H])C([</chem><br><chem>H])=NC=3[H]</chem>                                                                                                                                                                                            | 10000                            | 327              | 41               |      |
| SC111 | <chem>[H]C=1C([H])=C([H])C2=C(C=1[H])C([H])=C([H])C([H])=C2C([</chem><br><chem>H])([H])N4C([H])([H])C([H])([H])N(C=3C([H])=C([H])C([H])=</chem><br><chem>C([H])C=3OC([H])([H])C([H])([H])[H])C([H])([H])C4([H])[H]</chem>                                                                                                                                                | 10000                            | 264              | 59               |      |
| SC112 | <chem>[Cl]C=1C([H])=C([H])C([H])=C(C=1[Cl])N2C([H])([H])C([H])([</chem><br><chem>H])N(C([H])([H])C2([H])[H])C([H])([H])C4=C([H])C([H])=C([</chem><br><chem>H])C=3C([H])=C([H])C([H])=C([H])C=34</chem>                                                                                                                                                                   | 10000                            | 351              | 92               | [87] |
| SC113 | <chem>[H]C=2C([H])=C([H])C=1[S]C([H])=C(C=1C=2[H])C([H])([H])N</chem><br><chem>4C([H])([H])C([H])([H])N(C=3C([H])=C([H])C([H])=C([H])C=3</chem><br><chem>OC([H])([H])C([H])([H])[H])C([H])([H])C4([H])[H]</chem>                                                                                                                                                         | 10000                            | 219              | 45.1             |      |
| SC114 | <chem>[Cl]C=1C([H])=C([H])C([H])=C(C=1[Cl])N2C([H])([H])C([H])([</chem><br><chem>H])N(C([H])([H])C2([H])[H])C([H])([H])C3=C([H])[S]C=4C([H]</chem><br><chem>)=C([H])C([H])=C([H])C3=4</chem>                                                                                                                                                                             | 10000                            | 383              | 52.5             |      |
| SC115 | <chem>[H]C=1C([H])=C([H])C(=C([H])C=1[H])C([H])([H])N3C([H])([</chem><br><chem>H])C([H])([H])N(C=2C([H])=C([H])C([H])=C([H])C=2OC([H])([</chem><br><chem>H])C([H])([H])[H])C([H])([H])C3([H])[H]</chem>                                                                                                                                                                  | 10000                            | 217              | 42.7             |      |

| ID    | SMILES                                                                                                                                                                                                                              | K <sub>i</sub> [nM] <sup>a</sup> |                  |                  | Ref. |
|-------|-------------------------------------------------------------------------------------------------------------------------------------------------------------------------------------------------------------------------------------|----------------------------------|------------------|------------------|------|
|       |                                                                                                                                                                                                                                     | D <sub>1</sub> R                 | D <sub>2</sub> R | D <sub>3</sub> R |      |
| SC116 | <chem>[Cl]C=1C([H])=C([H])C([H])=C(C=1[Cl])N2C([H])([H])C([H])([H])N(C([H])([H])C2([H])[H])C([H])([H])C=3C([H])=C([H])C([H])=C([H])C=3[H]</chem>                                                                                    | 10000                            | 242              | 41               |      |
| SC117 | <chem>[H]C=1C([H])=C([H])C2=C(C=1[H])C(=C([H])N2[H])C([H])([H])N4C([H])([H])C([H])([H])N(C=3C([H])=C([H])C([H])=C([H])C=3OC([H])([H])C([H])([H])[H])C([H])([H])C4([H])[H]</chem>                                                    | 10000                            | 473              | 103              |      |
| SC118 | <chem>[Cl]C=1C([H])=C([H])C([H])=C(C=1[Cl])N2C([H])([H])C([H])([H])N(C([H])([H])C2([H])[H])C([H])([H])C3=C([H])N([H])C=4C([H])=C([H])C([H])=C([H])C3=4</chem>                                                                       | 10000                            | 502              | 123              |      |
| SC119 | <chem>[H]C=1C([H])=C([H])C(OC([H])([H])[H])=C(C=1[H])N2C([H])([H])C([H])([H])N(C([H])([H])C2([H])[H])C([H])([H])C([H])([H])C([H])([H])C([H])([H])N3N=N/C(=C3/[H])C=4C([H])=C([H])C(=C([H])C=4[H])N([H])[H]</chem>                   | 38430                            | 198.8            | 2.7              | [88] |
| SC120 | <chem>[I]C=1C([H])=C([H])C(=C([H])C=1[H])N2C([H])([H])C([H])([H])N(C([H])([H])C2([H])[H])C([H])([H])C([H])([H])N([H])C([H])([H])[C@]4([H])OC=3C([H])=C(O[H])C([H])=C([H])C=3C([H])([H])C4([H])[H]</chem>                            | 3960                             | 80.5             | 23               | [89] |
| SC121 | <chem>[H]/C1=C(\[H])C(O[H])=C([H])C=2O[C@]([H])(C([H])([H])C([H])([H])C1=2)C([H])([H])N([H])C([H])([H])C([H])([H])C([H])([H])C([H])([H])C([H])([H])[H]</chem>                                                                       | 10900                            | 8.19             | 547              |      |
| SC122 | <chem>[Cl]C=1C([H])=C([H])C(=C([H])C=1[H])N2C([H])([H])C([H])([H])N(C([H])([H])C2([H])[H])C([H])([H])C([H])([H])C([H])([H])C([H])([H])C4=NC=3C([H])=C([H])C([H])=C([H])C=3[S]4</chem>                                               | 1897                             | 219              | 31               | [56] |
| SC123 | <chem>O=C(N([H])[C@@]1([H])C([H])([H])C([H])([H])[C@]([H])(C([H])([H])C1([H])[H])C([H])([H])C([H])([H])N3C([H])([H])C([H])([H])N(C=2C([H])=C([H])C([H])=C([Cl])C=2[Cl])C([H])([H])C3([H])[H])N(C([H])([H])[H])C([H])([H])[H]</chem> | 2100                             | 0.47             | 0.27             |      |
| SC124 | <chem>[Cl]C=1C([H])=C([H])C([H])=C(C=1[Cl])N2C([H])([H])C([H])([H])N(C([H])([H])C2([H])[H])C([H])([H])C([H])([H])C([H])([H])C([H])([H])O/C4=C(\[H])C3=C([H])C([H])=NN3C([H])=C4[H]</chem>                                           | 2900                             | 34               | 7                |      |
| SC125 | <chem>[Cl]C=1C([H])=C([H])C([H])=C(C=1[Cl])N2C([H])([H])C([H])([H])N(C([H])([H])C2([H])[H])C([H])([H])C([H])([H])C([H])([H])C([H])([H])OC=4/C3=C(\[H])C([H])=NN3C([H])=C([H])C=4[H]</chem>                                          | 1800                             | 25               | 10               |      |
| SC126 | <chem>[Cl]C=1C([H])=C([H])C([H])=C(C=1[Cl])N2C([H])([H])C([H])([H])N(C([H])([H])C2([H])[H])C([H])([H])C([H])([H])C([H])([H])C([H])([H])OC=4C([H])=C([H])C3=C([H])C([H])=NN3C=4[H]</chem>                                            | 1200                             | 4.2              | 2.3              | [90] |
| SC127 | <chem>[Cl]C=1C([H])=C([H])C([H])=C(C=1[Cl])N2C([H])([H])C([H])([H])N(C([H])([H])C2([H])[H])C([H])([H])C([H])([H])C([H])([H])C([H])([H])O/C3=N/N4/C(=C3/[H])C([H])=C([H])C([H])=C4[H]</chem>                                         | 1100                             | 9.4              | 3.5              |      |
| SC128 | <chem>O=C([H])C=1C([H])=NN2C=1C([H])=C([H])C([H])=C2OC([H])([H])C([H])([H])C([H])([H])C([H])([H])N4C([H])([H])C([H])([H])N(C=3C([H])=C([H])C([H])=C([Cl])C=3[Cl])C([H])([H])C4([H])[H]</chem>                                       | 1600                             | 51               | 6.4              |      |
| SC129 | <chem>[Cl]/C1=C(\[H])C([H])=C([H])C(=C1[Cl])N2C([H])([H])C([H])([H])N(C([H])([H])C2([H])[H])C([H])([H])C([H])([H])C([H])([H])C([H])([H])[H]</chem>                                                                                  | 4300                             | 1.8              | 2.3              |      |

| ID    | SMILES                                                                                                                                                                                                                                                                                                                                                                  | K <sub>i</sub> [nM] <sup>a</sup> |                  |                  | Ref. |
|-------|-------------------------------------------------------------------------------------------------------------------------------------------------------------------------------------------------------------------------------------------------------------------------------------------------------------------------------------------------------------------------|----------------------------------|------------------|------------------|------|
|       |                                                                                                                                                                                                                                                                                                                                                                         | D <sub>1</sub> R                 | D <sub>2</sub> R | D <sub>3</sub> R |      |
|       | <chem>)]C([H])([H])O/C4=C(\ [H])C3=C(C([H])=NN3C([H])=C4[H])C([H])=NO[H]</chem>                                                                                                                                                                                                                                                                                         |                                  |                  |                  |      |
| SC130 | <chem>N#C/C1=N/N4/C(=C1/[H])C([H])=C(OC([H])([H])C([H])([H])C([H])([H])C([H])([H])N3C([H])([H])C([H])([H])N(C=2C([H])=C([H])C([H])=C([Cl])C=2[Cl])C([H])([H])C3([H])[H])C([H])=C4[H]</chem>                                                                                                                                                                             | 3500                             | 8.9              | 1.9              |      |
| SC131 | <chem>[F]C=1C([H])=C([H])C(=C([H])C=1[H])C([H])([H])C([H])([H])C([H])([H])C([H])([H])N2[C@@]4([H])C([H])([H])C([H])([H])[C@]2([H])C([H])([H])[C@@](O[H])(C=3C([H])=C([H])C([Cl])=C([H])C=3[H])C4([H])[H]</chem>                                                                                                                                                         | 10000                            | 33               | 9.7              |      |
| SC132 | <chem>[F]C=4C([H])=C([H])C(OC([H])([H])C([H])([H])C([H])([H])N1[C@@]3([H])C([H])([H])C([H])([H])[C@]1([H])C([H])([H])[C@@](O[H])(C=2C([H])=C([H])C([Cl])=C([H])C=2[H])C3([H])[H])=C([H])C=4[H]</chem>                                                                                                                                                                   | 10000                            | 22               | 4.1              |      |
| SC133 | <chem>[F]C=1C([H])=C([H])C([H])=C([H])C=1[S]C([H])([H])C([H])([H])C([H])([H])N2[C@@]4([H])C([H])([H])C([H])([H])[C@]2([H])C([H])([H])[C@@](O[H])(C=3C([H])=C([H])C([Cl])=C([H])C=3[H])C4([H])[H]</chem>                                                                                                                                                                 | 4093                             | 4.8              | 1.3              | [91] |
| SC134 | <chem>O=C(C=1C([H])=C([H])C([H])=C([H])C=1OC([H])([H])C([H])([H])C([H])([H])N5C([H])([H])C([H])([H])N(C=2C([H])=C([H])C([H])=C3C=2C([H])=C([H])N3[S](=O)(=O)C=4C([H])=C([H])C([H])=C([H])C=4[H])C([H])([H])C5([H])[H])N([H])[H]</chem>                                                                                                                                  | 1000                             | 6.3              | 0.1              |      |
| SC135 | <chem>O=C(C=1C([H])=C([H])C(=C([H])C=1[H])C=2C([H])=C([H])C([H])=C([H])C=2[H])N([H])C([H])([H])C([H])([H])C([H])([H])C([H])([H])N([C@]3([H])C([H])([H])C([H])=C(C#C[H])C([H])([H])C3([H])[H])C([H])([H])C([H])([H])C([H])([H])[H]</chem>                                                                                                                                | 13000                            | 9.4              | 1                |      |
| SC136 | <chem>O=C(C=1C([H])=C([H])C(=C([H])C=1[H])C=2C([H])=C([H])C([H])=C([H])C=2[H])N([H])C([H])([H])C([H])([H])C([H])([H])C([H])([H])N([C@@]3([H])C([H])([H])C([H])=C(C#C[H])C([H])([H])C3([H])[H])C([H])([H])C([H])([H])C([H])([H])[H]</chem>                                                                                                                               | 18000                            | 14               | 4.3              |      |
| SC137 | <chem>O=C(C=2C([H])=C([H])C(OC([H])([H])C([H])([H])C([H])([H])C([H])([H])C([H])([H])N=NN(C=1[H])C([H])([H])C([H])([H])C([H])([H])C([H])([H])C([H])([H])C([H])([H])C([H])([H])N([C@]3([H])C([H])([H])C([H])=C(C#C[H])OC3([H])[H])C([H])([H])C([H])([H])C([H])([H])[H]</chem>                                                                                             | 2600                             | 1.6              | 0.63             |      |
| SC138 | <chem>O=C(C=2C([H])=C([H])C(OC([H])([H])C([H])([H])C([H])([H])C([H])([H])C([H])([H])N=NN(C=1[H])C([H])([H])C([H])([H])C([H])([H])C([H])([H])C([H])([H])C([H])([H])C([H])([H])N([C@@]3([H])C([H])([H])C([H])=C(C#C[H])OC3([H])[H])C([H])([H])C([H])([H])C([H])([H])[H]</chem>                                                                                            | 3900                             | 4.9              | 2.2              | [92] |
| SC139 | <chem>O=C2C([H])=C([H])C=1/C(=C(/[H])C([H])=C(O[H])C=1N2[H])C([H])([H])C([H])([H])N(C([H])([H])C([H])([H])C([H])([H])C([H])([H])C([H])([H])C([H])([H])C([H])([H])C([H])([H])N([H])C(=O)C=4C([H])=C([H])C(OC([H])([H])C([H])([H])C([H])([H])C([H])([H])C=3N=NN(C=3[H])C([H])([H])C([H])([H])C([H])([H])C([H])([H])C([H])([H])C([H])([H])=C(OC([H])([H])[H])C=4[H]</chem> | 4600                             | 24               | 1.6              |      |
| SC140 | <chem>O=C(C=2C([H])=C([H])C(OC([H])([H])C([H])([H])C([H])([H])C([H])([H])C([H])([H])N=NN(C=1[H])C([H])([H])C([H])([H])C([H])([H])C([H])([H])C([H])([H])C([H])([H])C([H])([H])N([C@]3([H])C([H])([H])C([H])=C(C#C[H])OC3([H])[H])C([H])([H])C([H])([H])C([H])([H])[H]</chem>                                                                                             | 23000                            | 18               | 1.2              |      |



| ID    | SMILES                                                                                                                                                                                                                                | K <sub>i</sub> [nM] <sup>a</sup> |                  |                  | Ref. |
|-------|---------------------------------------------------------------------------------------------------------------------------------------------------------------------------------------------------------------------------------------|----------------------------------|------------------|------------------|------|
|       |                                                                                                                                                                                                                                       | D <sub>1</sub> R                 | D <sub>2</sub> R | D <sub>3</sub> R |      |
|       | <chem>=C([H])C(OC([H])([H])C([H])([H])C([H])([H])C=3C([H])=C([H])C([H])=C([H])C=3[H])=C(OC([H])([H])[H])C=4[H]</chem>                                                                                                                 |                                  |                  |                  |      |
| SC153 | <chem>O=C(N([H])C2=C([H])C1=C([H])C([H])=NN1C([H])=C2[H])C([H])([H])C([H])([H])C([H])([H])N4C([H])([H])C([H])([H])N(C=3C([H])=C([H])C([H])=C([H])C=3OC([H])([H])[H])C([H])([H])C4([H])[H]</chem>                                      | 1700                             | 46               | 97               |      |
| SC154 | <chem>O=C([H])C=1C([H])=NN4C=1C([H])=C([H])C(OC([H])([H])C([H])([H])C([H])([H])C([H])([H])N3C([H])([H])C([H])([H])N(C=2C([H])=C([H])C([H])=C([H])C=2OC([H])([H])[H])C([H])([H])C3([H])[H])=C4[H]</chem>                               | 1400                             | 7.8              | 17               |      |
| SC155 | <chem>O=C(N([H])C2=C([H])C1=C(C([H])=NN1C([H])=C2[H])C([H])=NO[H])C([H])([H])C([H])([H])C([H])([H])N4C([H])([H])C([H])([H])N(C=3C([H])=C([H])C([H])=C([Cl])C=3[Cl])C([H])([H])C4([H])[H]</chem>                                       | 2900                             | 0.57             | 2.2              |      |
| SC156 | <chem>[H]C=1C([H])=C([H])C(OC([H])([H])[H])=C(C=1[H])N2C([H])([H])C([H])([H])N(C([H])([H])C2([H])[H])C([H])([H])C([H])([H])C([H])([H])C([H])([H])OC=4C([H])=C([H])C3=C(C([H])=NN3C=4[H])C([H])=NO[H]</chem>                           | 1000                             | 4.2              | 2.3              |      |
| SC157 | <chem>O=C([H])C=1C([H])=NN4C=1C([H])=C([H])C(OC([H])([H])C([H])([H])C([H])([H])C([H])([H])C([H])([H])N([C@]3([H])C([H])([H])C=2C([H])=C([H])C([H])=C(O[H])C=2C([H])([H])C3([H])[H])C([H])([H])C([H])([H])C([H])([H])[H])=C4[H]</chem> | 1400                             | 2.4              | 1.6              |      |
| SC158 | <chem>[H]C=1C([H])=C([H])C(OC([H])([H])[H])=C(C=1[H])N2C([H])([H])C([H])([H])N(C([H])([H])C2([H])[H])C([H])([H])C([H])([H])C([H])([H])C([H])([H])C([H])([H])O/C4=C([H])C3=C([H])C([H])=NN3C([H])=C4[H]</chem>                         | 2800                             | 18               | 20               | [97] |
| SC159 | <chem>O=C([H])C=1C([H])=NN2C=1C([H])=C(C([H])=C2[H])N([H])C(=O)C([H])([H])C([H])([H])C([H])([H])N4C([H])([H])C([H])([H])N(C=3C([H])=C([H])C([H])=C([H])C=3OC([H])([H])[H])C([H])([H])C4([H])[H]</chem>                                | 1200                             | 1.4              | 70               |      |
| SC160 | <chem>O=C([H])C=1C([H])=NN4C=1C([H])=C(OC([H])([H])C([H])([H])C([H])([H])C([H])([H])C([H])([H])N([C@]3([H])C([H])([H])C=2C([H])=C([H])C([H])=C(O[H])C=2C([H])([H])C3([H])[H])C([H])([H])C([H])([H])C([H])([H])[H])C([H])=C4[H]</chem> | 1300                             | 2.3              | 1.1              |      |
| SC161 | <chem>[H]/C1=C([H])C4=C(C(O[H])=C1[H])C([H])([H])C([H])([H])C([H])([H])C([H])([H])N(C([H])([H])C([H])([H])C([H])([H])C([H])([H])C([H])([H])C([H])([H])C([H])([H])O/C3=C([H])C2=C([H])C([H])=NN2C([H])=C3[H])C4([H])[H]</chem>         | 3700                             | 96               | 13               |      |
| SC162 | <chem>[H]/C1=C([H])C4=C(C(O[H])=C1[H])C([H])([H])C([H])([H])C([H])([H])C([H])([H])N(C([H])([H])C([H])([H])C([H])([H])C([H])([H])C([H])([H])C([H])([H])OC=3C([H])=C([H])C2=C([H])C([H])=NN2C=3[H])C4([H])[H]</chem>                    | 2100                             | 0.63             | 0.71             |      |
| SC163 | <chem>[H]C=1C([H])=C([H])C(OC([H])([H])[H])=C(C=1[H])N2C([H])([H])C([H])([H])N(C([H])([H])C2([H])[H])C([H])([H])C([H])([H])C([H])([H])C([H])([H])C([H])([H])OC=4C([H])=C([H])C3=C([H])C([H])=NN3C=4[H]</chem>                         | 1100                             | 1.8              | 5                |      |
| SC164 | <chem>[H]/C1=C([H])C4=C(C(O[H])=C1[H])C([H])([H])C([H])([H])C([H])([H])C([H])([H])N(C([H])([H])C([H])([H])C([H])([H])C([H])([H])C([H])([H])C([H])([H])C([H])([H])O/C3=C([H])C2=C([H])C([H])=NN2C([H])=C3[H])C4([H])[H]</chem>         | 1800                             | 2.2              | 0.59             |      |





| ID    | SMILES                                                                                                                                                                                                                                                          | K <sub>i</sub> [nM] <sup>a</sup> |                  |                  | Ref.  |
|-------|-----------------------------------------------------------------------------------------------------------------------------------------------------------------------------------------------------------------------------------------------------------------|----------------------------------|------------------|------------------|-------|
|       |                                                                                                                                                                                                                                                                 | D <sub>1</sub> R                 | D <sub>2</sub> R | D <sub>3</sub> R |       |
|       | <chem>C([H])([H])C([H])([H])C([H])([H])O/C5=C([H])C4=C(C([H])=NN4C([H])=C5[H])C([H])=NO[H]</chem>                                                                                                                                                               |                                  |                  |                  |       |
| SC188 | <chem>O=C1N([H])C=2C(OC1([H])[H])=C(C([H])=C([H])C=2O([H])N3C([H])([H])C([H])([H])N(C([H])([H])C3([H])[H])C([H])([H])C([H])([H])C([H])([H])[H]</chem>                                                                                                           | 20000                            | 120              | 5.9              |       |
| SC189 | <chem>O=C2C([H])=C([H])C=1/C(=C([H])C([H])=C(O[H])C=1N2([H])N3C([H])([H])C([H])([H])N(C([H])([H])C3([H])[H])C([H])([H])[H]</chem>                                                                                                                               | 20000                            | 780              | 380              |       |
| SC190 | <chem>O=C([H])C=1C([H])=NN5C=1C([H])=C(OC([H])([H])C([H])([H])C([H])([H])C([H])([H])N4C([H])([H])C([H])([H])N(C=2C([H])=C([H])C(O[H])=C3OC([H])([H])C([H])([H])OC=23C([H])([H])C4([H])[H])C([H])=C5[H]</chem>                                                   | 11000                            | 5.7              | 24               |       |
| SC191 | <chem>O=C1N([H])C=2C(OC1([H])[H])=C(C([H])=C([H])C=2O([H])N3C([H])([H])C([H])([H])N(C([H])([H])C3([H])[H])C([H])([H])[H]</chem>                                                                                                                                 | 20000                            | 630              | 48               |       |
| SC192 | <chem>O=C2C([H])=C([H])C=1/C(=C([H])C([H])=C(O[H])C=1N2([H])N3C([H])([H])C([H])([H])N(C([H])([H])C3([H])[H])C([H])([H])C([H])([H])C([H])([H])O/C5=C([H])C4=C(C([H])=NN4C([H])=C5[H])C(=O)[H]</chem>                                                             | 15000                            | 1                | 2.3              |       |
| SC193 | <chem>O=C/C1=N/N2/C(=C1/[H])C([H])=C([H])C([H])=C2([H])N([H])C([H])([H])C([H])([H])C([H])([H])C([H])([H])N4C([H])([H])C([H])([H])N(C=3C([H])=C([H])C([H])=C([H])C=3OC([H])([H])[H])C([H])([H])C4([H])[H]</chem>                                                 | 1600                             | 270              | 3.5              | [100] |
| SC194 | <chem>O=C/C1=N/N2/C(=C1/[H])C([H])=C([H])C([H])=C2([H])N([H])C([H])([H])C([H])([H])C([H])([H])C([H])([H])N4C([H])([H])C([H])([H])N/C3=N/C(=N/C(=C3/[H])C([F])([F])[F])C(C([H])([H])C([H])([H])C([H])[H])C([H])([H])C4([H])[H]</chem>                            | 7500                             | 430              | 1.2              |       |
| SC195 | <chem>O=C(C=1C([H])=C([H])C(=C([H])C=1[H])N(C([H])([H])[H])C([H])([H])[H])N([H])C([H])([H])C([H])([H])C([H])([H])C([H])([H])C([H])([H])N3C([H])([H])C([H])([H])[C@]([H])(C=2C([H])=C([H])C([H])=C(O[H])C=2[H])C3([H])[H]</chem>                                 | 10000                            | 345              | 27               | [101] |
| SC196 | <chem>[F]C([F])([F])C=1C([H])=C(C([H])=C([H])C=1[Cl])C2(O[H])C([H])([H])C([H])([H])N(C([H])([H])C2([H])[H])C([H])([H])C([H])([H])C([H])([H])C([H])([H])N(C=3C([H])=C([H])C(OC([H])([H])[H])=C([H])C=3[H])C=4C([H])=C([H])C(OC([H])([H])[H])=C([H])C=4[H]</chem> | 10000                            | 417              | 437              | [102] |
| SC197 | <chem>N#CC=1C([H])=C([H])C([H])=C(C=1[H])N2C([H])([H])C([H])([H])N(C([H])([H])C2([H])[H])C([H])([H])C([H])([H])C([H])([H])C([H])([H])N([H])C(=O)C=3C([H])=C([H])C(=C([H])C=3[H])C=4C([H])=C([H])[S]C=4[H]</chem>                                                | 10000                            | 743              | 0.5              | [103] |
| SC198 | <chem>[F]C=1C([H])=C([H])C(OC([H])([H])[H])=C(C=1[H])[C@@]2([H])C([H])([H])[C@]2([H])C([H])([H])N(C([H])([H])C([H])([H])C([H])([H])[S]/C4=N/N=C(/C=3C([H])=C([H])C([H])=C([H])C=3[H])N4C([H])([H])[H])C([H])(C([H])([H])[H])C([H])([H])[H]</chem>               | 5000                             | 512.9            | 104.7            | [104] |
| SC199 | <chem>O=C(C=2C([H])=C([H])C=1C([H])=C([H])C([H])=C([H])C=1C=2[H])N([H])C([H])([H])C([H])([H])C([H])([H])C([H])([H])N(C([H])([H])[C@]3([H])C([H])([H])[C@@]3([H])C=4C([H])=C([Cl])C([H])=C([H])C=4OC([H])([H])[H])C([H])([H])C([H])([H])[H]</chem>               | 1981                             | 408              | 23.4             |       |

| ID    | SMILES                                                                                                                                                                                                                                                            | K <sub>i</sub> [nM] <sup>a</sup> |                  |                  | Ref.  |
|-------|-------------------------------------------------------------------------------------------------------------------------------------------------------------------------------------------------------------------------------------------------------------------|----------------------------------|------------------|------------------|-------|
|       |                                                                                                                                                                                                                                                                   | D <sub>1</sub> R                 | D <sub>2</sub> R | D <sub>3</sub> R |       |
| SC200 | <chem>[Cl]C=1C([H])=C([H])C(OC([H])([H])[H])=C(C=1[H])[C@]2([H])C([H])([H])[C@]2([H])C([H])([H])N(C([H])([H])C([H])([H])[H])C([H])([H])C([H])([H])C([H])([H])[S]/C4=N/N=C(/C=3C([H])=C([H])C([H])=C([H])C=3[H])N4C([H])([H])[H]</chem>                            | 1509                             | 238              | 31.6             |       |
| SC201 | <chem>[Cl]C=1C([H])=C([H])C(OC([H])([H])[H])=C(C=1[H])[C@@]2([H])C([H])([H])[C@@]2([H])C([H])([H])N(C([H])([H])C([H])([H])C([H])([H])[H])C([H])([H])C([H])([H])C([H])([H])[S]/C4=N/N=C(/C=3C([H])=C([H])C([H])=C([H])C=3[H])N4C([H])([H])[H]</chem>               | 1918                             | 233              | 36.7             |       |
| SC202 | <chem>[F]C=1C([H])=C([H])C(OC([H])([H])[H])=C(C=1[H])[C@@]2([H])C([H])([H])[C@]2([H])C([H])([H])N(C([H])([H])C([H])([H])[H])C([H])([H])C([H])([H])C([H])([H])[S]/C4=N/N=C(/C=3C([H])=C([H])C([H])=C([H])C=3[H])N4C([H])([H])[H]</chem>                            | 1724.6                           | 275.4            | 44               |       |
| SC203 | <chem>[H]C2([H])C=1N=C([S]C=1C([H])([H])[C@@]([H])(N([H])C([H])([H])C([H])([H])C([H])([H])[H])C2([H])[H])N([H])[H]</chem>                                                                                                                                         | 10000                            | 743.5            | 0.9              | [105] |
| SC204 | <chem>O=C(/C2=C(\ [H])C=1C([H])=C([H])C([H])=C([H])C=1N2[H])N([H])C([H])([H])C([H])([H])[C@@]3([H])C([H])([H])[C@]3([H])C([H])([H])N4C([H])([H])[C@@]([H])(OC([H])([H])[C@]4([H])C([H])([H])[H])C=5C([H])=C([H])C(=NC=5[H])N([H])[H]</chem>                       | 5630                             | 87.8             | 1.85             |       |
| SC205 | <chem>O=C(/C2=C(\ [H])C=1C([H])=C([H])C([H])=C([H])C=1N2[H])N([H])[C@@]3([H])C([H])([H])C([H])([H])[C@]([H])(C([H])([H])C3([H])[H])C([H])([H])C([H])([H])N4C([H])([H])[C@@]([H])(OC([H])([H])[C@]4([H])C([H])([H])[H])C=5C([H])=C([H])C(=NC=5[H])N([H])[H]</chem> | 100000                           | 104              | 21.6             | [106] |
| SC206 | <chem>[H]/C1=C(\ [H])C(O[H])=C([H])C2=C1OC([H])([H])[C@]3([H])N(C([H])([H])C([H])([H])O[C@]23[H])C([H])([H])C([H])([H])C([H])([H])[H]</chem>                                                                                                                      | 100000                           | 28               | 1.67             |       |

<sup>a</sup>All K<sub>i</sub> values retrieved from ChEMBL were determined in vitro utilizing radio-ligand binding assays.

#### 2.4 Dataset of D<sub>3</sub>R-selective compounds (ChEMBL)

**Table S4.** D<sub>3</sub>R-selective compounds extracted from ChEMBL with in vitro determined biological activities for all investigated DR subtypes.

| ID    | SMILES                                                                                                                                                                                                            | K <sub>i</sub> [nM] <sup>a</sup> |                  |                  | Ref.  |
|-------|-------------------------------------------------------------------------------------------------------------------------------------------------------------------------------------------------------------------|----------------------------------|------------------|------------------|-------|
|       |                                                                                                                                                                                                                   | D <sub>1</sub> R                 | D <sub>2</sub> R | D <sub>3</sub> R |       |
| SC207 | <chem>O=C(C=1C([H])=C([Cl])C(=C([H])C=1OC([H])([H])[H])N([H])[H])N([H])C([H])([H])[C@]2([H])C([H])([H])C([H])([H])N(C2([H])[H])C([H])([H])C=3C([H])=C([H])C([H])=C([H])C=3[H]</chem>                              | 11000                            | 1400             | 570              | [62]  |
| SC208 | <chem>[H]C=1C([H])=C([H])C(=C([H])C=1[H])C2=N/C(=C(/[H])[S]2)C([H])([H])N([H])C([H])([H])[C@]3([H])C([H])([H])C([H])([H])N(C3([H])[H])C([H])([H])C=4C([H])=C([H])C([H])=C([H])C=4[H]</chem>                       | 8850                             | 7900             | 660              | [63]  |
| SC209 | <chem>[Br]C=1C([H])=C([H])C(OC([H])([H])[H])=C(C=1[H])C2=N/C(=C(/[H])O2)C([H])([H])N([H])C([H])([H])C([H])([H])[C@]3([H])C([H])([H])C([H])([H])N(C3([H])[H])C([H])([H])C=4C([H])=C([H])C([H])=C([H])C=4[H]</chem> | 8950                             | 1070             | 120              |       |
| SC210 | <chem>[H]C=1C([H])=C([H])C(=C([H])C=1[H])N2C([H])([H])C([H])([H])N(C([H])([H])C2([H])[H])C([H])([H])C3=C([H])C([H])=C([H])N3[H]</chem>                                                                            | 5400                             | 3000             | 570              | [107] |

| ID    | SMILES                                                                                                                                                                                                                                   | K <sub>i</sub> [nM] <sup>a</sup> |                  |                  | Ref.  |
|-------|------------------------------------------------------------------------------------------------------------------------------------------------------------------------------------------------------------------------------------------|----------------------------------|------------------|------------------|-------|
|       |                                                                                                                                                                                                                                          | D <sub>1</sub> R                 | D <sub>2</sub> R | D <sub>3</sub> R |       |
| SC211 | <chem>O=C(C=2[S]C=1C([H])=C([H])C([H])=C([H])C=1C=2[H])N([H])C([H])([H])C([H])([H])C([H])([H])C([H])([H])N4C([H])([H])C([H])([H])N(C=3C([H])=C([H])C([H])=C([Cl])C=3[Cl])C([H])([H])C4([H])[H]</chem>                                    | 8800                             | 3600             | 0.5              | [108] |
| SC212 | <chem>O=C(C=2C([H])=C([Br])C=1C([H])=C([H])C([H])=C([H])C=1C=2OC([H])([H])[H]N([H])C([H])([H])C([H])([H])[C@]3([H])C([H])([H])C([H])([H])N(C3([H])[H])C([H])([H])C=4C([H])=C([H])C([H])=C([H])C=4[H]</chem>                              | 1700                             | 2000             | 580              | [65]  |
| SC213 | <chem>O=C(C=2OC=1C([H])=C([H])C([I])=C([H])C=1C=2[H])N([H])C([H])([H])C([H])([H])C([H])([H])C([H])([H])N4C([H])([H])C([H])([H])N(C=3C([H])=C([H])C([H])=C([Cl])C=3[Cl])C([H])([H])C4([H])[H]</chem>                                      | 3300                             | 3200             | 5.7              | [109] |
| SC214 | <chem>O=C(C=2C([H])=C([H])C(C#CC=1C([H])=C([H])C([H])=C([H])C=1[H])=C([H])C=2[H])N([H])C([H])([H])C([H])([H])N4C([H])([H])C([H])([H])N(C=3C([H])=C([H])C([H])=C([Cl])C=3[Cl])C([H])([H])C4([H])[H]</chem>                                | 5500                             | 4700             | 29               |       |
| SC215 | <chem>O=C(C=2C([H])=C([H])C([H])=C(C#CC=1C([H])=C([H])C([H])=C([H])C=1[H])C=2[H])N([H])C([H])([H])C([H])([H])N4C([H])([H])C([H])([H])N(C=3C([H])=C([H])C([H])=C([Cl])C=3[Cl])C([H])([H])C4([H])[H]</chem>                                | 3100                             | 1200             | 68               | [110] |
| SC216 | <chem>O=C(C=2C([H])=C([H])C(C#CC=1C([H])=C([H])C([H])=C([H])C=1[H])=C([H])C=2[H])N([H])C([H])([H])C([H])([H])C([H])([H])C([H])([H])N4C([H])([H])C([H])([H])N(C=3C([H])=C([H])C([H])=C([H])C=3OC([H])([H])[H]C([H])([H])C4([H])[H]</chem> | 16000                            | 1400             | 10               |       |
| SC217 | <chem>O=C(C=2C([H])=C([H])C([H])=C(C#CC=1C([H])=C([H])C([H])=C([H])C=1[H])C=2[H])N([H])C([H])([H])C([H])([H])C([H])([H])C([H])([H])N4C([H])([H])C([H])([H])N(C=3C([H])=C([H])C([H])=C([H])C=3OC([H])([H])[H]C([H])([H])C4([H])[H]</chem> | 5900                             | 1200             | 22               |       |
| SC218 | <chem>[Cl]C=1C([H])=C([H])C(=C([H])C=1[Cl])N2C([H])([H])C([H])([H])N(C([H])([H])C2([H])[H])C([H])([H])C=4N=C3C([H])=C([H])C(=NN3C=4[H])N5C([H])([H])C([H])([H])N(C([H])([H])C5([H])[H])C([H])([H])[H]</chem>                             | 13000                            | 8000             | 880              | [66]  |
| SC219 | <chem>O=C(/C2=C([H])C=1C([H])=C([H])C([H])=C([H])C=1C([H])([H])N2[H])N([H])C([H])([H])C([H])([H])C([H])([H])C([H])([H])N5C([H])([H])C4=C([H])C=3C([H])=C([H])C([H])=C(OC([H])([H])[H])C=3N4C([H])([H])C5([H])[H]</chem>                  | 10000                            | 1012             | 33.5             |       |
| SC220 | <chem>O=C(/C2=N/C([H])=C1C([H])=C([H])C([H])=C([H])C1=C2[H])N([H])C([H])([H])C([H])([H])C([H])([H])C([H])([H])N4C([H])([H])C([H])([H])N(C=3C([H])=C([H])C([H])=C([Cl])C=3[H])C([H])([H])C4([H])[H]</chem>                                | 5500                             | 1039             | 0.27             | [111] |
| SC221 | <chem>O=C3/C2=C([H])C=1C([H])=C([H])C([H])=C([H])C=1N2C([H])([H])C([H])([H])N3C([H])([H])C([H])([H])C([H])([H])C([H])([H])N6C([H])([H])C5=C([H])C=4C([H])=C([H])C([H])=C(OC([H])([H])[H])C=4N5C([H])([H])C6([H])[H]</chem>               | 10000                            | 3530             | 8.6              |       |
| SC222 | <chem>O=C(/C2=C([H])C=1C([H])=C([H])C([H])=C([H])C=1C([H])([H])N2[H])N([H])C([H])([H])C([H])([H])C([H])([H])C([H])([H])N5C([H])([H])C4=N/C3=C([H])C([H])=C([H])C(OC([H])([H])[H])=C3[C@]4([H])C([H])([H])C5([H])[H]</chem>               | 10000                            | 6475             | 6                |       |



| ID    | SMILES                                                                                                                                                                                                                                      | K <sub>i</sub> [nM] <sup>a</sup> |                  |                  | Ref.  |
|-------|---------------------------------------------------------------------------------------------------------------------------------------------------------------------------------------------------------------------------------------------|----------------------------------|------------------|------------------|-------|
|       |                                                                                                                                                                                                                                             | D <sub>1</sub> R                 | D <sub>2</sub> R | D <sub>3</sub> R |       |
| SC236 | <chem>[Cl]C=1C([H])=C([H])C(=C([H])C=1[H])N2C([H])([H])C([H])([H])N(C([H])([H])C2([H])[H])C([H])([H])C([H])([H])C([H])([H])C([H])([H])C4=NC=3C([H])=C([H])C([H])=C([H])C=3[S]4</chem>                                                       | 1273                             | 2321             | 214              |       |
| SC237 | <chem>[Cl]C=1C([H])=C([H])C(=C([H])C=1[H])N2C([H])([H])C([H])([H])N(C([H])([H])C2([H])[H])C([H])([H])C([H])([H])C([H])([H])C([H])([H])C4=NC=3C([H])=C([H])C([H])=C([H])C=3O4</chem>                                                         | 1172                             | 3962             | 180              |       |
| SC238 | <chem>[F]C([F])([F])C=3C([H])=C([H])C(OC([H])([H])C([H])([H])C([H])([H])N2C([H])([H])C([H])([H])N(/C1=N/C([H])=C([H])C([H])=C1[H])C([H])([H])C2([H])[H])=C([H])C=3[H]</chem>                                                                | 2344                             | 1092             | 355              | [56]  |
| SC239 | <chem>[Cl]C=1C([H])=C([H])C(=C([H])C=1[H])N2C([H])([H])C([H])([H])N(C([H])([H])C2([H])[H])C([H])([H])C([H])([H])C([H])([H])C([H])([H])C4=NC=3C([H])=C([H])C([H])=C([H])C=3O4</chem>                                                         | 7939                             | 3108             | 119              |       |
| SC240 | <chem>[H]C=1C([H])=C([H])C(=C([H])C=1[H])C([H])([H])C([H])([H])C@@]2([H])OC([H])([H])C([H])([H])N(C2([H])[H])C([H])([H])C4=NC=3C([H])=C([H])C([H])=C([H])C=3N4[H]</chem>                                                                    | 100000                           | 100000           | 10.8             |       |
| SC241 | <chem>[H]C=1C([H])=C([H])C(=C([H])C=1[H])C([H])([H])C([H])([H])C@]2([H])OC([H])([H])C([H])([H])N(C2([H])[H])C([H])([H])C4=NC=3C([H])=C([H])C([H])=C([H])C=3N4[H]</chem>                                                                     | 100000                           | 100000           | 25.9             | [115] |
| SC242 | <chem>[H]C=1C([H])=C([H])C(=C([H])C=1[H])C([H])([H])C([H])([H])C@@]2([H])OC([H])([H])C([H])([H])N(C2([H])[H])C([H])([H])C4=NC=3C([H])=C([H])C([H])=C([H])C=3N4[H]</chem>                                                                    | 100000                           | 100000           | 15.7             |       |
| SC243 | <chem>[H]C=1C([H])=C([H])C(=C([H])C=1[H])C([H])([H])C([H])([H])C([H])([H])N(C([H])([H])C([H])([H])C=3C([H])=C([H])C=2OC([H])([H])OC=2C=3[H])C([H])([H])C([H])([H])C=4C([H])=C([H])C(OC([H])([H])C([H])=C(OC([H])([H])C([H])C=4[H]</chem>    | 1682                             | 1729             | 498              | [116] |
| SC244 | <chem>[H]C=1C([H])=C([H])C(=C([H])C=1[H])C([H])([H])C([H])([H])C([H])([H])OC=2C([H])=C([H])C(=C([H])C=2OC([H])([H])C([H])([H])C([H])([H])C([H])([H])N([H])C([H])([H])C@@]([H])(O[H])C=3C([H])=C([H])C(O[H])=C(O[H])C=3[H]</chem>            | 2900                             | 1900             | 660              | [96]  |
| SC245 | <chem>O=C2C([H])=C([H])C=1/C(=C(/[H])C([H])=C(O[H])C=1N2[H])C@]([H])(O[H])C([H])([H])N([H])C([H])([H])C([H])([H])C=4C([H])=C([H])C(OC([H])([H])C([H])([H])C([H])([H])C=3C([H])=C([H])C([H])=C([H])C=3[H])=C(OC([H])([H])C([H])C=4[H]</chem> | 6800                             | 2900             | 790              |       |
| SC246 | <chem>[H]/C2=C(\ [H])C(O[H])=C1OC([H])([H])C([H])([H])O/C1=C2 \ N3C([H])([H])C([H])([H])N(C([H])([H])C3([H])[H])C([H])([H])C([H])</chem>                                                                                                    | 7700                             | 3200             | 790              |       |
| SC247 | <chem>[H]/C2=C(\ [H])C(O[H])=C1OC([H])([H])C([H])([H])O/C1=C2 \ N3C([H])([H])C([H])([H])N([H])C([H])([H])C3([H])[H]</chem>                                                                                                                  | 6000                             | 6900             | 110              | [99]  |
| SC248 | <chem>O=C1N([H])C2=C(OC1([H])[H])C(=C([H])C([H])=C2O[H])N3C([H])([H])C([H])([H])C([H])([H])N([H])C([H])([H])C3([H])[H]</chem>                                                                                                               | 20000                            | 14000            | 510              |       |
| SC249 | <chem>O=C1N([H])C=2C(OC1([H])[H])=C(C([H])=C([H])C=2O[H])N3C([H])([H])C([H])([H])C([H])([H])N(C([H])([H])C3([H])[H])C([H])([H])[H]</chem>                                                                                                   | 20000                            | 6400             | 42               |       |

| ID    | SMILES                                                                                                                                                                                                                                                                        | K <sub>i</sub> [nM] <sup>a</sup> |                  |                  | Ref.  |
|-------|-------------------------------------------------------------------------------------------------------------------------------------------------------------------------------------------------------------------------------------------------------------------------------|----------------------------------|------------------|------------------|-------|
|       |                                                                                                                                                                                                                                                                               | D <sub>1</sub> R                 | D <sub>2</sub> R | D <sub>3</sub> R |       |
| SC250 | <chem>O=C2C([H])=C([H])C=1/C(=C/[H])C([H])=C(O[H])C=1N2([H])N3C([H])([H])C([H])([H])N(C([H])([H])C3([H])[H])C([H])([H])C([H])([H])C([H])([H])[H]</chem>                                                                                                                       | 20000                            | 1900             | 420              |       |
| SC251 | <chem>O=C1N([H])C2=C(OC1([H])[H])C(=C([H])C([H])=C2O[H])N3C([H])([H])C([H])([H])N([H])C([H])([H])C3([H])[H]</chem>                                                                                                                                                            | 20000                            | 8300             | 160              |       |
| SC252 | <chem>O=C(/C1=N/N2/C(=C1/[H])C([H])=C([H])C([H])=C2[H])N([H])C([H])([H])C([H])([H])C([H])([H])C([H])([H])N5C([H])([H])C([H])([H])[N+]<sup>4</sup>(C=3C([H])=C([H])C([H])=C([H])C=3OC([H])([H])C4([H])[H])C([H])([H])C5([H])[H]</chem>                                         | 5700                             | 6300             | 200              | [100] |
| SC253 | <chem>O=C(C=2[S]C=1C([H])=C([H])C([H])=C([H])C=1C=2[H])N([H])C([H])([H])C([H])([H])C([H])([H])C([H])([H])N4C([H])([H])C([H])([H])N/C3=N/C(=N/C(=C3/[H])C([F])([F])[F])C(C([H])([H])[H])C([H])([H])[H]C([H])([H])C([H])([H])C4([H])[H]</chem>                                  | 10000                            | 4000             | 2.4              | [100] |
| SC254 | <chem>[H]/C1=C(\ [H])C(=C([H])C(O[H])=C1[H])[C@@]2([H])C([H])([H])C([H])([H])N(C2([H])[H])C([H])([H])C([H])([H])C([H])([H])C([H])([H])C([H])([H])C([H])([H])[H]</chem>                                                                                                        | 1278                             | 3555             | 162              | [101] |
| SC255 | <chem>O=C(/C1=C(\ [H])C([H])=NC=2C([H])=C([H])C([H])=C([H])C1=2)N([H])C([H])([H])C([H])([H])C([H])([H])C([H])([H])N4C([H])([H])C3=C([H])C(O[H])=C(OC([H])([H])[H])C([H])=C3C([H])([H])C4([H])[H]</chem>                                                                       | 1810                             | inactive         | 22               | [117] |
| SC256 | <chem>O=C(C=1C([H])=C([H])C([H])=C([H])C=1[H])N([H])C([H])([H])C([H])([H])C([H])([H])C([H])([H])N3C([H])([H])C2=C([H])C(O[H])=C(OC([H])([H])[H])C([H])=C2C([H])([H])C3([H])[H]</chem>                                                                                         | 1600                             | inactive         | 10               |       |
| SC257 | <chem>O=C(C=1C([H])=C([H])C(=C([H])C=1[H])C=2C([H])=C([H])[S]C=2[H])N([H])C([H])([H])C([H])([H])C([H])([H])C([H])([H])N4C([H])([H])C([H])([H])N(C=3C([H])=C([Cl])C([H])=C([Cl])C=3[H])C([H])([H])C4([H])[H]</chem>                                                            | 10000                            | 2049             | 0.44             | [103] |
| SC258 | <chem>O=C(C=2C([H])=C([H])C=1C([H])=C([H])C([H])=C([H])C=1C=2[H])N([H])C([H])([H])C([H])([H])C([H])([H])C([H])([H])N(C([H])([H])[C@]3([H])C([H])([H])[C@@]3([H])C=4C([H])=C([H])C([H])=C([F])C=4[H])C([H])([H])C([H])([H])C([H])([H])[H]</chem>                               | 1308                             | 4823             | 26.7             |       |
| SC259 | <chem>[F]C=1C([H])=C([H])C(OC([H])([H])[H])=C(C=1[H])[C@@]2([H])C([H])([H])[C@@]2([H])C([H])([H])N(C([H])([H])[C@]3([H])C([H])([H])C3([H])[H])C([H])([H])C([H])([H])C([H])([H])[S]/C5=N/N=C(/C=4C([H])=C([H])C([H])=C([H])C=4[H])N5C([H])([H])[H]</chem>                      | 1078                             | 5000             | 64.6             |       |
| SC260 | <chem>O=C(C=1C([H])=C([H])C(=C([H])C=1[H])C2=NC([H])=C([H])C([H])=C2[H])N([H])C([H])([H])C([H])([H])C([H])([H])C([H])([H])N(C([H])([H])[C@]3([H])C([H])([H])[C@@]3([H])C=4C([H])=C([F])C([H])=C([H])C=4OC([H])([H])[H])C([H])([H])C([H])([H])C([H])([H])C([H])([H])[H]</chem> | 1758                             | 3144             | 4                | [104] |
| SC261 | <chem>[F]C=1C([H])=C([H])C(OC([H])([H])[H])=C(C=1[H])[C@@]2([H])C([H])([H])[C@]2([H])C([H])([H])N(C([H])([H])C([H])([H])C([H])([H])[H])C([H])([H])C([H])([H])C([H])([H])[S]/C4=N/N=C(/C=3C([H])=C([H])C([H])=C([H])C=3[H])N4C([H])([H])[H]</chem>                             | 1668                             | 1161.4           | 87.1             |       |
| SC262 | <chem>O=C(C=2C([H])=C([H])C=1C([H])=C([H])C([H])=C([H])C=1C=2[H])N([H])C([H])([H])C([H])([H])C([H])([H])C([H])([H])N(C([H])([H])[C@]3([H])C([H])([H])[C@@]3([H])C=4C([H])=C([H])C([H])([H])C([H])([H])C([H])([H])C([H])([H])[H]</chem>                                        | 1711                             | 5000             | 43               |       |

| ID    | SMILES                                                                                                                                                                                                                                                                         | K <sub>i</sub> [nM] <sup>a</sup> |                  |                  | Ref. |
|-------|--------------------------------------------------------------------------------------------------------------------------------------------------------------------------------------------------------------------------------------------------------------------------------|----------------------------------|------------------|------------------|------|
|       |                                                                                                                                                                                                                                                                                | D <sub>1</sub> R                 | D <sub>2</sub> R | D <sub>3</sub> R |      |
|       | <chem>=C([H])C=4[H]C([F])([F])[F]C([H])([H])C([H])([H])C([H])([H])[H]</chem>                                                                                                                                                                                                   |                                  |                  |                  |      |
| SC263 | <chem>O=C(C=1C([H])=C([H])C(=C([H])C=1[H])C2=NC([H])=C([H])C([H])=C2[H])N([H])C([H])([H])C([H])([H])C([H])([H])C([H])([H])C([H])([H])N(C([H])([H])[C@]3([H])C([H])([H])[C@@]3([H])C=4C([H])=C([H])C([H])=C([F])C=4[H]C([H])([H])C([H])([H])C([H])([H])[H]</chem>               | 2906                             | 5000             | 45.4             |      |
| SC264 | <chem>O=C(/C2=C(\ [H])C=1C([H])=C([H])C([H])=C([H])C=1N2[H])N([H])C([H])([H])C([H])([H])C([H])([H])C([H])([H])N(C([H])([H])[C@]3([H])C([H])([H])[C@@]3([H])C=4C([H])=C([H])C([H])=C([Cl])C=4[H]C([H])([H])C([H])([H])C([H])([H])[H]</chem>                                     | 992                              | 3494             | 11.1             |      |
| SC265 | <chem>O=C(C=2C([H])=C([H])C=1C([H])=C([H])C([H])=C([H])C=1C=2[H])N([H])C([H])([H])C([H])([H])C([H])([H])C([H])([H])N(C([H])([H])[C@]3([H])C([H])([H])[C@@]3([H])C=4C([H])=C([F])C([H])=C([H])C=4OC([H])([H])[H])C([H])([H])C([H])([H])C([H])([H])[H]</chem>                    | 967                              | 1083.9           | 14.5             |      |
| SC266 | <chem>O=C(C=1C([H])=C([H])C(=C([H])C=1[H])C2=NC([H])=C([H])C([H])=C2[H])N([H])C([H])([H])C([H])([H])C([H])([H])C([H])([H])C([H])([H])N(C([H])([H])[C@]3([H])C([H])([H])[C@@]3([H])C=4C([H])=C([Cl])C([H])=C([H])C=4OC([H])([H])[H])C([H])([H])C([H])([H])C([H])([H])[H]</chem> | 5000                             | 2105             | 39.4             |      |
| SC267 | <chem>O=C(C=2C([H])=C([H])C=1C([H])=C([H])C([H])=C([H])C=1C=2[H])N([H])C([H])([H])C([H])([H])C([H])([H])C([H])([H])N(C([H])([H])[C@]3([H])C([H])([H])[C@@]3([H])C=4C([H])=C([Cl])C([H])=C([H])C=4OC([H])([H])[H])C([H])([H])C([H])([H])C([H])([H])[H]</chem>                   | 930                              | 1116             | 26.9             |      |
| SC268 | <chem>O=C(C=1C([H])=C([H])C(=C([H])C=1[H])C2=NC([H])=C([H])C([H])=C2[H])N([H])C([H])([H])C([H])([H])C([H])([H])C([H])([H])C([H])([H])N(C([H])([H])[C@]3([H])C([H])([H])[C@@]3([H])C=4C([H])=C([H])C([F])=C([H])C=4[H]C([H])([H])C([H])([H])C([H])([H])[H]</chem>               | 3631                             | 5000             | 106.3            |      |
| SC269 | <chem>O=C(C=1C([H])=C([H])C(=C([H])C=1[H])C2=NC([H])=C([H])C([H])=C2[H])N([H])C([H])([H])C([H])([H])C([H])([H])C([H])([H])C([H])([H])N(C([H])([H])[C@]3([H])C([H])([H])[C@@]3([H])C=4C([H])=C([H])C(=C([H])C=4[H]C([F])([F])[F]C([H])([H])C([H])([H])C([H])([H])[H]</chem>     | 1423                             | 5000             | 23.4             |      |
| SC270 | <chem>O=C(C=1C([H])=C([H])C(=C([H])C=1[H])C2=NC([H])=C([H])C([H])=C2[H])N([H])C([H])([H])C([H])([H])C([H])([H])C([H])([H])C([H])([H])N(C([H])([H])[C@]3([H])C([H])([H])[C@@]3([H])C=4C([H])=C([F])C([H])=C([H])C=4OC([H])([H])[H])C([H])([H])C([H])([H])C([H])([H])[H]</chem>  | 4898                             | 1349             | 4.1              |      |
| SC271 | <chem>O=C(C=1C([H])=C([H])C(=C([H])C=1[H])C2=NC([H])=C([H])C([H])=C2[H])N([H])C([H])([H])C([H])([H])C([H])([H])C([H])([H])C([H])([H])N(C([H])([H])[C@@]3([H])C([H])([H])[C@]3([H])C=4C([H])=C([H])C([H])=C([Cl])C=4[Cl]C([H])([H])C([H])([H])C([H])([H])[H]</chem>             | 2344                             | 1023             | 5.3              |      |
| SC272 | <chem>O=C(C=2C([H])=C([H])C=1C([H])=C([H])C([H])=C([H])C=1C=2[H])N([H])C([H])([H])C([H])([H])C([H])([H])C([H])([H])N(C([H])([H])[C@]3([H])C([H])([H])[C@@]3([H])C=4C([H])=C([H])C([H])=C([H])C=4OC([H])([H])[H])C([H])([H])C([H])([H])C([H])([H])[H]</chem>                    | 940                              | 4012             | 15.5             |      |

| ID    | SMILES                                                                                                                                                                                                                                                             | K <sub>i</sub> [nM] <sup>a</sup> |                  |                  | Ref.  |
|-------|--------------------------------------------------------------------------------------------------------------------------------------------------------------------------------------------------------------------------------------------------------------------|----------------------------------|------------------|------------------|-------|
|       |                                                                                                                                                                                                                                                                    | D <sub>1</sub> R                 | D <sub>2</sub> R | D <sub>3</sub> R |       |
|       | <chem>H)([H])[C@]3([H])C([H])([H])[C@@]3([H])C=4C([H])=C([H])C([H])=C([Cl])C=4[H]C([H])([H])C([H])([H])C([H])([H])[H]</chem>                                                                                                                                       |                                  |                  |                  |       |
| SC273 | <chem>O=C(C=1C([H])=C([H])C(=C([H])C=1[H])C2=NC([H])=C([H])C([H])=C2[H])N([H])C([H])([H])C([H])([H])C([H])([H])C([H])([H])N(C([H])([H])[C@]3([H])C([H])([H])[C@@]3([H])C=4C([H])=C([H])C([H])=C([Cl])C=4[Cl])C([H])([H])C([H])([H])C([H])([H])[H]</chem>           | 1647                             | 2362             | 1.2              |       |
| SC274 | <chem>O=C(C=1C([H])=C([H])C(=C([H])C=1[H])C2=NC([H])=C([H])C([H])=C2[H])N([H])C([H])([H])C([H])([H])C([H])([H])C([H])([H])N(C([H])([H])[C@]3([H])C([H])([H])[C@@]3([H])C=4C([H])=C([H])C([Cl])=C([H])C=4[H]C([H])([H])C([H])([H])C([H])([H])[H]</chem>             | 1308                             | 5000             | 17.6             |       |
| SC275 | <chem>O=C(C=2C([H])=C([H])C=1C([H])=C([H])C([H])=C([H])C=1C=2[H])N([H])C([H])([H])C([H])([H])C([H])([H])C([H])([H])N(C([H])([H])[C@]3([H])C([H])([H])[C@@]3([H])C=4C([H])=C([H])C([F])=C([H])C=4[H]C([H])([H])C([H])([H])C([H])([H])[H]</chem>                     | 992                              | 5623             | 55.8             |       |
| SC276 | <chem>O=C(/C2=C(\ [H])C=1C([H])=C([H])C([H])=C([H])C=1N2[H])N([H])C([H])([H])C([H])([H])C([H])([H])C([H])([H])N(C([H])([H])[C@]3([H])C([H])([H])[C@@]3([H])C=4C([H])=C([H])C([F])=C([H])C=4[H]C([H])([H])C([H])([H])C([H])([H])[H]</chem>                          | 1457                             | 5934             | 45.7             |       |
| SC277 | <chem>O=C(C=2C([H])=C([H])C=1C([H])=C([H])C([H])=C([H])C=1C=2[H])N([H])C([H])([H])C([H])([H])C([H])([H])C([H])([H])N(C([H])([H])[C@]3([H])C([H])([H])[C@@]3([H])C=4C([H])=C([H])C([H])=C([Cl])C=4[Cl])C([H])([H])C([H])([H])C([H])([H])[H]</chem>                  | 1047                             | 1148             | 20.8             |       |
| SC278 | <chem>O=C(/C2=C(\ [H])C=1C([H])=C([H])C([H])=C([H])C=1N2[H])N([H])C([H])([H])C([H])([H])C([H])([H])C([H])([H])N(C([H])([H])[C@]3([H])C([H])([H])[C@@]3([H])C=4C([H])=C([H])C(=C([H])C=4[H]C([F])([F])[F])C([H])([H])C([H])([H])C([H])([H])[H]</chem>               | 1278                             | 5000             | 33.1             |       |
| SC279 | <chem>O=C(/C2=C(\ [H])C=1C([H])=C([H])C([H])=C([H])C=1N2[H])N([H])C([H])([H])C([H])([H])C([H])([H])C([H])([H])N(C([H])([H])[C@]3([H])C([H])([H])[C@@]3([H])C=4C([H])=C([H])C([H])=C([F])C=4[H]C([H])([H])C([H])([H])C([H])([H])[H]</chem>                          | 1105                             | 3494             | 18.8             |       |
| SC280 | <chem>O=C(C=1C([H])=C([H])C(=C([H])C=1[H])C2=NC([H])=C([H])C([H])=C2[H])N([H])C([H])([H])C([H])([H])C([H])([H])C([H])([H])N(C([H])([H])[C@@]3([H])C([H])([H])[C@]3([H])C=4C([H])=C([F])C([H])=C([H])C=4OC([H])([H])[H])C([H])([H])C([H])([H])C([H])([H])[H]</chem> | 1071                             | 1230             | 3.8              |       |
| SC281 | <chem>O=C(C=2C([H])=C([H])C=1C([H])=C([H])C([H])=C([H])C=1C=2[H])N([H])[C@]3([H])C([H])([H])[C@](O[H])(C3([H])[H])C([H])([H])C([H])([H])N([C@]5([H])C([H])([H])C=4[S]C(=NC=4C([H])([H])C5([H])[H])N([H])[H])C([H])([H])C([H])([H])C([H])([H])[H]</chem>            | inactive                         | 3902             | 30               | [105] |
| SC282 | <chem>[H]C=4C([H])=C3C1=C(C([H])=C([H])C=2N=C([S]C1=2)N([H])[H])C([H])([H])[C@]5([H])C3=C(C=4[H])C([H])([H])C([H])([H])N5C([H])([H])[H]</chem>                                                                                                                     | 1150                             | 1740             | 381              | [118] |
| SC283 | <chem>[H]/C1=C(\ [H])C(=NC([H])=C1[C@@]2([H])OC([H])([H])[C@@]([H])(N(C2([H])[H])C([H])([H])C([H])([H])C([H])([H])[H])C([H])([H])[H])N([H])[H]</chem>                                                                                                              | 100000                           | 1740             | 185              | [106] |

| ID    | SMILES                                                                                                                                                                                                                     | K <sub>i</sub> [nM] <sup>a</sup> |                  |                  | Ref. |
|-------|----------------------------------------------------------------------------------------------------------------------------------------------------------------------------------------------------------------------------|----------------------------------|------------------|------------------|------|
|       |                                                                                                                                                                                                                            | D <sub>1</sub> R                 | D <sub>2</sub> R | D <sub>3</sub> R |      |
| SC284 | <chem>O=C(/C=C(\ [H])C=1C([H])=C([H])C([H])=C([H])C=1N2[H])N([H])C([H])([H])C([H])([H])[C@@]([H])(O[H])C([H])([H])N3C([H])([H])[C@@]([H])(OC([H])([H])[C@]3([H])C([H])([H])[H])C=4C([H])=C([H])C(=NC=4[H])N([H])[H]</chem> | 100000                           | 1010             | 423              |      |

<sup>a</sup>All KI values retrieved from ChEMBL were determined in vitro utilizing radio-ligand binding assays.

## 2. In vitro screening– overview of 2D structures and NDF values of all compounds

**Table S5.** Overview of all compounds selected for further in vitro investigations. 2D structures and NDF ± standard deviation (SD) are shown for each compound (n = 4). All NDF values for D<sub>2</sub>R were obtained in the previously published article of Zell et al [42]. NDF, normalized decreased fluorescence.

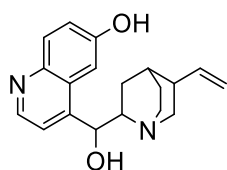

**SC285**

NDF (D<sub>1</sub>R) = 0.83 ± 0.06  
NDF (D<sub>2</sub>R) = 1.13 ± 0.37  
NDF (D<sub>3</sub>R) = 1.17 ± 0.11

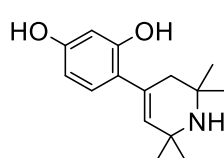

**SC286**

NDF (D<sub>1</sub>R) = 0.88 ± 0.20  
NDF (D<sub>2</sub>R) = 1.05 ± 0.45  
NDF (D<sub>3</sub>R) = 1.04 ± 0.10

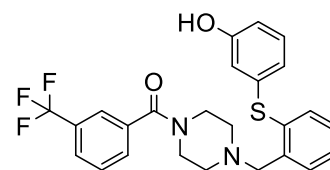

**SC287**

NDF (D<sub>1</sub>R) = 0.91 ± 0.21  
NDF (D<sub>2</sub>R) = 0.90 ± 0.25  
NDF (D<sub>3</sub>R) = 1.00 ± 0.17

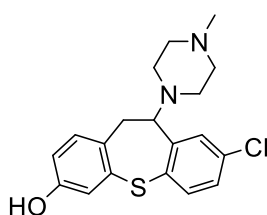

**2**

NDF (D<sub>1</sub>R) = 5.41 ± 1.97  
NDF (D<sub>2</sub>R) = 40.41 ± 1.39  
NDF (D<sub>3</sub>R) = 4.16 ± 1.08

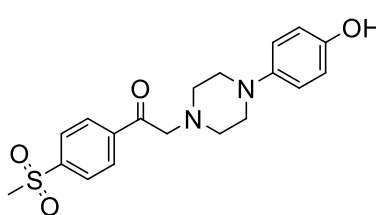

**SC288**

NDF (D<sub>1</sub>R) = 3.21 ± 3.27  
NDF (D<sub>2</sub>R) = 1.01 ± 0.38  
NDF (D<sub>3</sub>R) = 1.58 ± 0.58

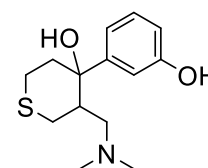

**SC289**

NDF (D<sub>1</sub>R) = 1.66 ± 1.16  
NDF (D<sub>2</sub>R) = 0.90 ± 0.30  
NDF (D<sub>3</sub>R) = 1.24 ± 0.25

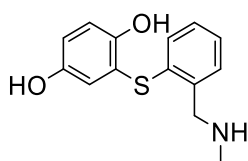

**SC290**

NDF (D<sub>1</sub>R) = 3.50 ± 3.16  
NDF (D<sub>2</sub>R) = 0.91 ± 0.36  
NDF (D<sub>3</sub>R) = 1.81 ± 1.04

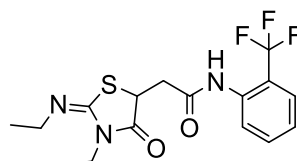

**SC291**

NDF (D<sub>1</sub>R) = 0.81 ± 0.08  
NDF (D<sub>2</sub>R) = 0.84 ± 0.23  
NDF (D<sub>3</sub>R) = 1.02 ± 0.24

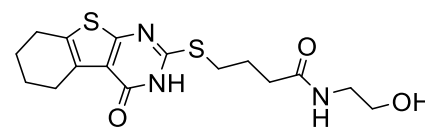

**SC292**

NDF (D<sub>1</sub>R) = 0.80 ± 0.21  
NDF (D<sub>2</sub>R) = 0.95 ± 0.43  
NDF (D<sub>3</sub>R) = 0.92 ± 0.13

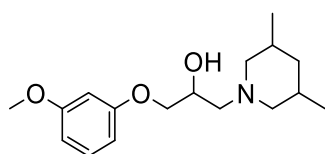

**SC293**

NDF (D<sub>1</sub>R) = 0.85 ± 0.14  
NDF (D<sub>2</sub>R) = 1.02 ± 0.39  
NDF (D<sub>3</sub>R) = 1.04 ± 0.11

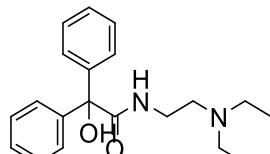

**SC294**

NDF (D<sub>1</sub>R) = 2.72 ± 2.66  
NDF (D<sub>2</sub>R) = 1.01 ± 0.50  
NDF (D<sub>3</sub>R) = 1.49 ± 0.54

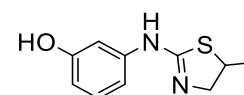

**SC295**

NDF (D<sub>1</sub>R) = 1.08 ± 0.42  
NDF (D<sub>2</sub>R) = 0.95 ± 0.43  
NDF (D<sub>3</sub>R) = 1.26 ± 0.25

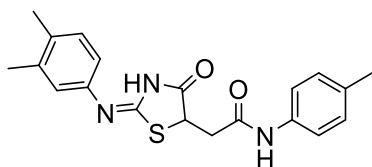

**SC296**

NDF (D<sub>1</sub>R) = 1.02 ± 0.36

NDF (D<sub>2</sub>R) = 0.94 ± 0.32

NDF (D<sub>3</sub>R) = 0.93 ± 0.12

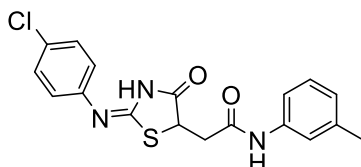

**SC297**

NDF (D<sub>1</sub>R) = 0.89 ± 0.24

NDF (D<sub>2</sub>R) = 0.96 ± 0.38

NDF (D<sub>3</sub>R) = 1.04 ± 0.11

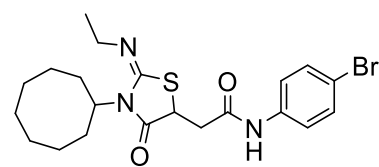

**SC298**

NDF (D<sub>1</sub>R) = 1.21 ± 0.43

NDF (D<sub>2</sub>R) = 1.00 ± 0.35

NDF (D<sub>3</sub>R) = 0.85 ± 0.13

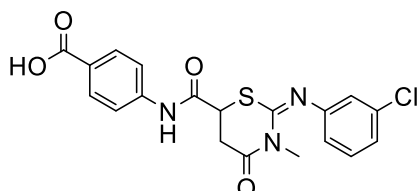

**SC299**

NDF (D<sub>1</sub>R) = 0.94 ± 0.13

NDF (D<sub>2</sub>R) = 0.82 ± 0.25

NDF (D<sub>3</sub>R) = 1.05 ± 0.36

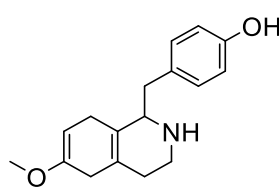

**SC300**

NDF (D<sub>1</sub>R) = 2.72 ± 0.84

NDF (D<sub>2</sub>R) = 1.14 ± 0.56

NDF (D<sub>3</sub>R) = 2.16 ± 0.40

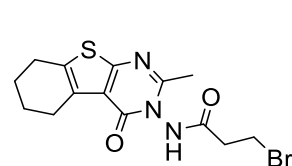

**SC301**

NDF (D<sub>1</sub>R) = 0.78 ± 0.22

NDF (D<sub>2</sub>R) = 0.99 ± 0.35

NDF (D<sub>3</sub>R) = 0.97 ± 0.11

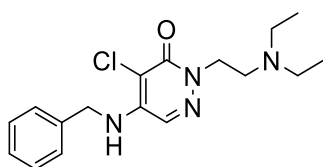

**SC302**

NDF (D<sub>1</sub>R) = 1.04 ± 0.28

NDF (D<sub>2</sub>R) = 0.99 ± 0.39

NDF (D<sub>3</sub>R) = 1.26 ± 0.14

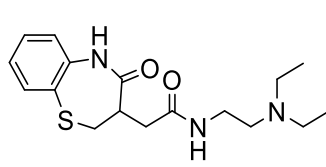

**SC303**

NDF (D<sub>1</sub>R) = 1.00 ± 0.33

NDF (D<sub>2</sub>R) = 1.02 ± 0.36

NDF (D<sub>3</sub>R) = 1.50 ± 0.24

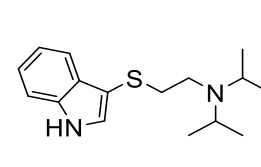

**SC304**

NDF (D<sub>1</sub>R) = 0.88 ± 0.17

NDF (D<sub>2</sub>R) = 0.98 ± 0.32

NDF (D<sub>3</sub>R) = 1.20 ± 0.11

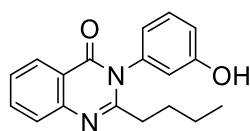

**SC305**

NDF (D<sub>1</sub>R) = 0.90 ± 0.26

NDF (D<sub>2</sub>R) = 0.93 ± 0.29

NDF (D<sub>3</sub>R) = 1.03 ± 0.14

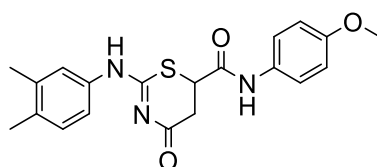

**SC306**

NDF (D<sub>1</sub>R) = 1.05 ± 0.44

NDF (D<sub>2</sub>R) = 0.94 ± 0.36

NDF (D<sub>3</sub>R) = 1.09 ± 0.30

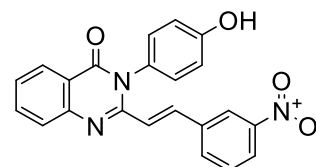

**SC307**

NDF (D<sub>1</sub>R) = 0.93 ± 0.16

NDF (D<sub>2</sub>R) = 0.86 ± 0.24

NDF (D<sub>3</sub>R) = 0.93 ± 0.15

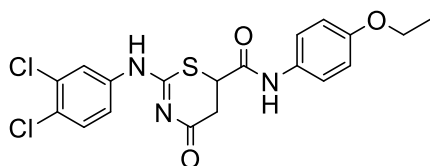

**SC308**

NDF (D<sub>1</sub>R) = 0.87 ± 0.20

NDF (D<sub>2</sub>R) = 2.04 ± 1.34

NDF (D<sub>3</sub>R) = 1.64 ± 0.29

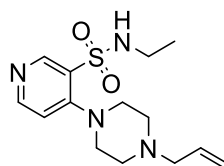

**SC309**

NDF (D<sub>1</sub>R) = 0.96 ± 0.34

NDF (D<sub>2</sub>R) = 1.10 ± 0.46

NDF (D<sub>3</sub>R) = 2.03 ± 0.18

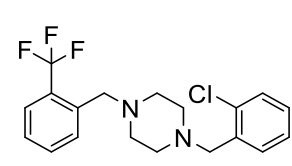

**SC310**

NDF (D<sub>1</sub>R) = 0.99 ± 0.34

NDF (D<sub>2</sub>R) = 1.06 ± 0.41

NDF (D<sub>3</sub>R) = 1.54 ± 0.33

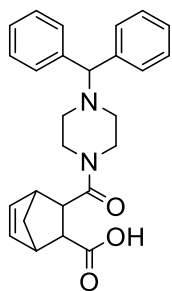

**SC311**

NDF (D<sub>1</sub>R) = 1.09 ± 0.43  
 NDF (D<sub>2</sub>R) = 1.02 ± 0.35  
 NDF (D<sub>3</sub>R) = 1.67 ± 0.44

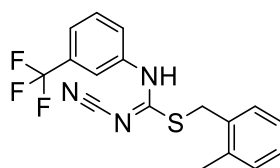

**SC312**

NDF (D<sub>1</sub>R) = 0.97 ± 0.40  
 NDF (D<sub>2</sub>R) = 1.10 ± 0.44  
 NDF (D<sub>3</sub>R) = 1.23 ± 0.27

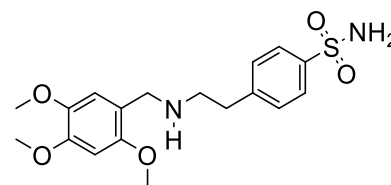

**SC313**

NDF (D<sub>1</sub>R) = 0.88 ± 0.33  
 NDF (D<sub>2</sub>R) = 0.94 ± 0.32  
 NDF (D<sub>3</sub>R) = 1.12 ± 0.15

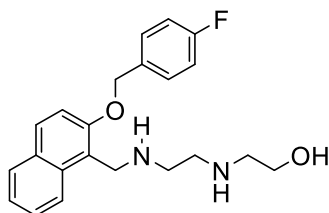

**SC314**

NDF (D<sub>1</sub>R) = 4.17 ± 1.08  
 NDF (D<sub>2</sub>R) = 1.68 ± 0.90  
 NDF (D<sub>3</sub>R) = 3.00 ± 0.61

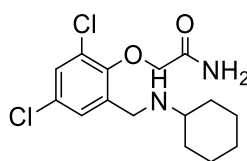

**SC315**

NDF (D<sub>1</sub>R) = 1.18 ± 1.01  
 NDF (D<sub>2</sub>R) = 0.95 ± 0.32  
 NDF (D<sub>3</sub>R) = 1.06 ± 0.20

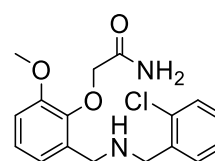

**SC316**

NDF (D<sub>1</sub>R) = 0.93 ± 0.30  
 NDF (D<sub>2</sub>R) = 1.01 ± 0.44  
 NDF (D<sub>3</sub>R) = 1.16 ± 0.16

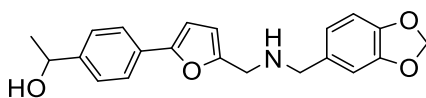

**SC317**

NDF (D<sub>1</sub>R) = 1.06 ± 0.47  
 NDF (D<sub>2</sub>R) = 0.93 ± 0.42  
 NDF (D<sub>3</sub>R) = 1.07 ± 0.15

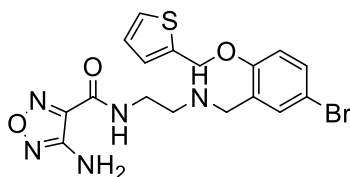

**SC318**

NDF (D<sub>1</sub>R) = 1.81 ± 0.42  
 NDF (D<sub>2</sub>R) = 1.14 ± 0.57  
 NDF (D<sub>3</sub>R) = 2.39 ± 0.48

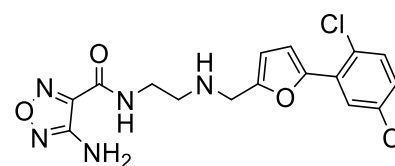

**SC319**

NDF (D<sub>1</sub>R) = 0.89 ± 0.26  
 NDF (D<sub>2</sub>R) = 2.41 ± 2.01  
 NDF (D<sub>3</sub>R) = 3.64 ± 1.08

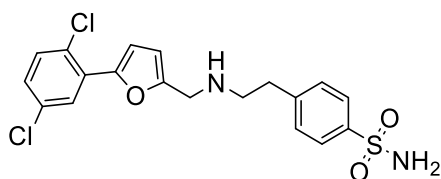

**3**

NDF (D<sub>1</sub>R) = 1.78 ± 1.35  
 NDF (D<sub>2</sub>R) = 3.99 ± 2.58  
 NDF (D<sub>3</sub>R) = 3.96 ± 1.10

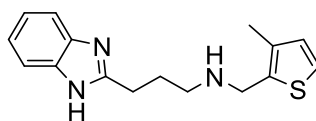

**SC320**

NDF (D<sub>1</sub>R) = -  
 NDF (D<sub>2</sub>R) = -  
 NDF (D<sub>3</sub>R) = -

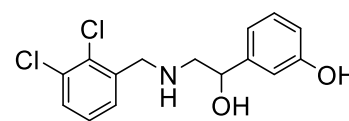

**4**

NDF (D<sub>1</sub>R) = 0.90 ± 0.31  
 NDF (D<sub>2</sub>R) = 0.90 ± 0.38  
 NDF (D<sub>3</sub>R) = 2.75 ± 0.61

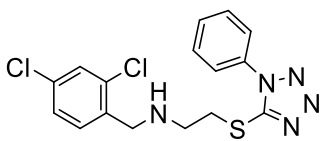

**SC321**

NDF (D<sub>1</sub>R) = 1.00 ± 0.42  
 NDF (D<sub>2</sub>R) = 0.97 ± 0.36  
 NDF (D<sub>3</sub>R) = 1.26 ± 0.24

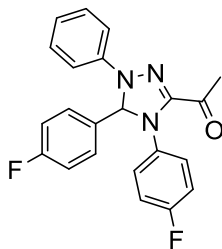

**SC322**

NDF (D<sub>1</sub>R) = 0.86 ± 0.24  
 NDF (D<sub>2</sub>R) = 0.90 ± 0.25  
 NDF (D<sub>3</sub>R) = 1.01 ± 0.23

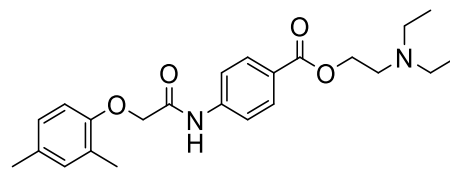

**SC323**

NDF (D<sub>1</sub>R) = 1.43 ± 0.58  
 NDF (D<sub>2</sub>R) = 0.95 ± 0.35  
 NDF (D<sub>3</sub>R) = 1.55 ± 0.23

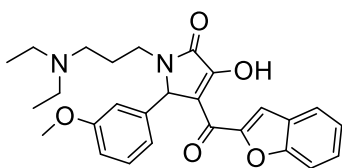

**SC324**

NDF (D<sub>1</sub>R) = -  
 NDF (D<sub>2</sub>R) = -  
 NDF (D<sub>3</sub>R) = -

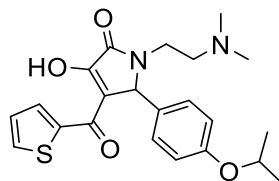

**SC325**

NDF (D<sub>1</sub>R) = 1.02 ± 0.46  
 NDF (D<sub>2</sub>R) = 0.94 ± 0.46  
 NDF (D<sub>3</sub>R) = 1.22 ± 0.27

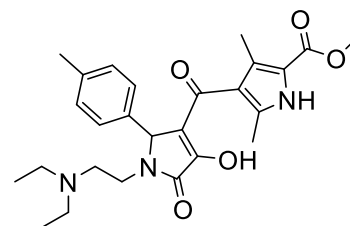

**SC326**

NDF (D<sub>1</sub>R) = 0.87 ± 0.33  
 NDF (D<sub>2</sub>R) = 0.95 ± 0.42  
 NDF (D<sub>3</sub>R) = 1.06 ± 0.36

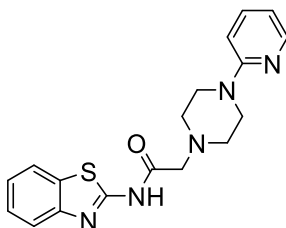

**SC327**

NDF (D<sub>1</sub>R) = 0.92 ± 0.39  
 NDF (D<sub>2</sub>R) = 0.90 ± 0.39  
 NDF (D<sub>3</sub>R) = 1.00 ± 0.20

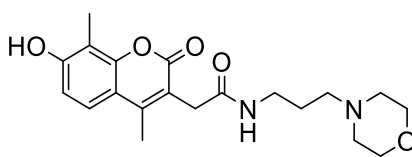

**SC328**

NDF (D<sub>1</sub>R) = 0.43 ± 0.15  
 NDF (D<sub>2</sub>R) = 0.99 ± 0.43  
 NDF (D<sub>3</sub>R) = 1.13 ± 0.31

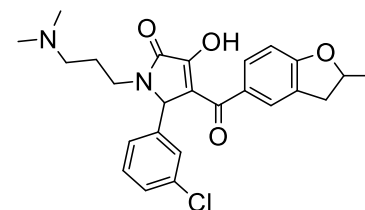

**SC329**

NDF (D<sub>1</sub>R) = -  
 NDF (D<sub>2</sub>R) = -  
 NDF (D<sub>3</sub>R) = -

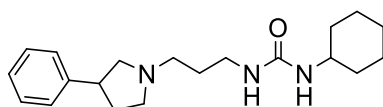

**SC330**

NDF (D<sub>1</sub>R) = 1.88 ± 0.72  
 NDF (D<sub>2</sub>R) = 1.35 ± 0.68  
 NDF (D<sub>3</sub>R) = 3.31 ± 0.92

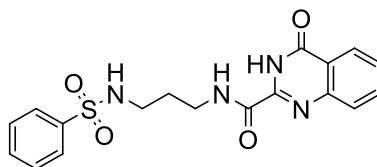

**SC331**

NDF (D<sub>1</sub>R) = 0.95 ± 0.17  
 NDF (D<sub>2</sub>R) = 0.90 ± 0.35  
 NDF (D<sub>3</sub>R) = 1.14 ± 0.40

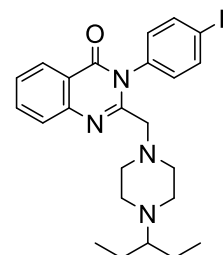

**SC332**

NDF (D<sub>1</sub>R) = 0.97 ± 0.40  
 NDF (D<sub>2</sub>R) = 0.90 ± 0.36  
 NDF (D<sub>3</sub>R) = 1.18 ± 0.28

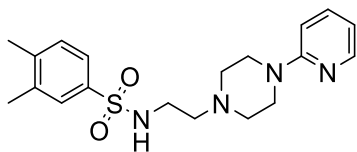

**SC333**

NDF (D<sub>1</sub>R) = 1.13 ± 0.52  
 NDF (D<sub>2</sub>R) = 2.98 ± 1.77  
 NDF (D<sub>3</sub>R) = 2.49 ± 0.47

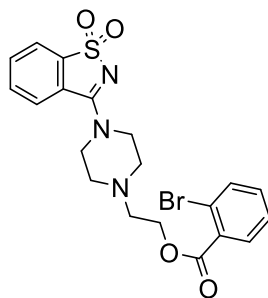

**SC334**

NDF (D<sub>1</sub>R) = 0.95 ± 0.35  
 NDF (D<sub>2</sub>R) = 0.96 ± 0.37  
 NDF (D<sub>3</sub>R) = 1.12 ± 0.30

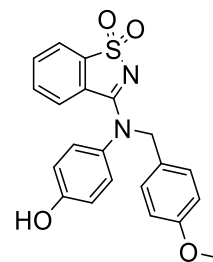

**SC335**

NDF (D<sub>1</sub>R) = 0.93 ± 0.39  
 NDF (D<sub>2</sub>R) = 1.03 ± 0.42  
 NDF (D<sub>3</sub>R) = 1.40 ± 0.54

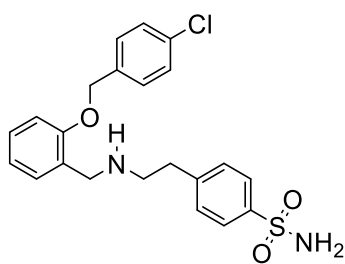

**SC336**

NDF (D<sub>1</sub>R) = 1.46 ± 0.71  
 NDF (D<sub>2</sub>R) = 1.07 ± 0.46  
 NDF (D<sub>3</sub>R) = 2.76 ± 0.63

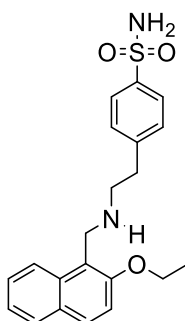

**SC337**

NDF (D<sub>1</sub>R) = 1.12 ± 0.56  
 NDF (D<sub>2</sub>R) = 0.99 ± 0.40  
 NDF (D<sub>3</sub>R) = 1.24 ± 0.22

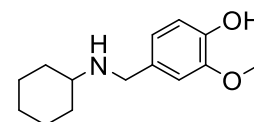

**SC338**

NDF (D<sub>1</sub>R) = 1.14 ± 0.77  
 NDF (D<sub>2</sub>R) = 0.93 ± 0.38  
 NDF (D<sub>3</sub>R) = 1.15 ± 0.35

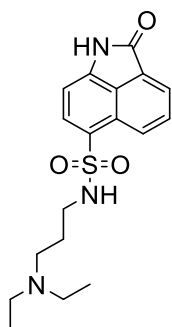

**SC339**

NDF (D<sub>1</sub>R) = 0.59 ± 0.17  
 NDF (D<sub>2</sub>R) = 0.94 ± 0.41  
 NDF (D<sub>3</sub>R) = 1.11 ± 0.48

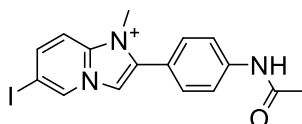

**SC340**

NDF (D<sub>1</sub>R) = 0.83 ± 0.35  
 NDF (D<sub>2</sub>R) = 1.41 ± 1.07  
 NDF (D<sub>3</sub>R) = 1.10 ± 0.29

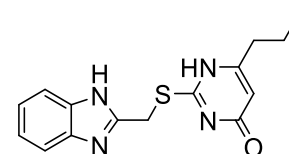

**SC341**

NDF (D<sub>1</sub>R) = 0.83 ± 0.51  
 NDF (D<sub>2</sub>R) = 1.52 ± 1.15  
 NDF (D<sub>3</sub>R) = 0.92 ± 0.14

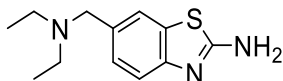

**SC342**

NDF (D<sub>1</sub>R) = 1.24 ± 0.51  
NDF (D<sub>2</sub>R) = 1.38 ± 0.91  
NDF (D<sub>3</sub>R) = 1.24 ± 0.29

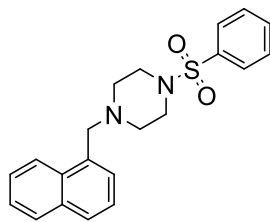

**SC343**

NDF (D<sub>1</sub>R) = 1.36 ± 0.89  
NDF (D<sub>2</sub>R) = 1.06 ± 0.44  
NDF (D<sub>3</sub>R) = 1.15 ± 0.32

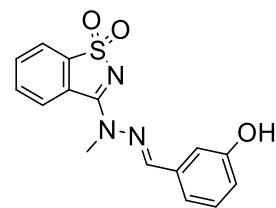

**SC344**

NDF (D<sub>1</sub>R) = 1.09 ± 0.58  
NDF (D<sub>2</sub>R) = 1.06 ± 0.42  
NDF (D<sub>3</sub>R) = 0.99 ± 0.13

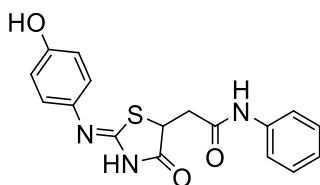

**SC345**

NDF (D<sub>1</sub>R) = 0.93 ± 0.32  
NDF (D<sub>2</sub>R) = 0.95 ± 0.38  
NDF (D<sub>3</sub>R) = 1.11 ± 0.36

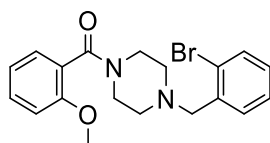

**SC346**

NDF (D<sub>1</sub>R) = 1.04 ± 0.54  
NDF (D<sub>2</sub>R) = 0.97 ± 0.39  
NDF (D<sub>3</sub>R) = 1.15 ± 0.37

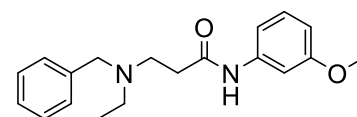

**5**

NDF (D<sub>1</sub>R) = 1.26 ± 0.64  
NDF (D<sub>2</sub>R) = 15.74 ± 18.15  
NDF (D<sub>3</sub>R) = 2.65 ± 0.64

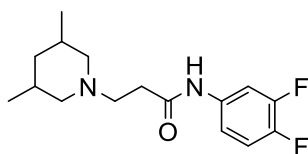

**SC347**

NDF (D<sub>1</sub>R) = 1.12 ± 0.60  
NDF (D<sub>2</sub>R) = 1.05 ± 0.50  
NDF (D<sub>3</sub>R) = 1.40 ± 0.33

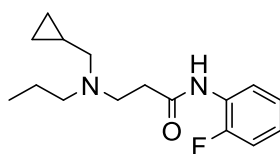

**SC348**

NDF (D<sub>1</sub>R) = 0.89 ± 0.31  
NDF (D<sub>2</sub>R) = 1.02 ± 0.38  
NDF (D<sub>3</sub>R) = 1.36 ± 0.36

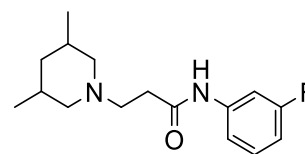

**SC349**

NDF (D<sub>1</sub>R) = 1.12 ± 0.59  
NDF (D<sub>2</sub>R) = 1.26 ± 0.70  
NDF (D<sub>3</sub>R) = 1.95 ± 0.47

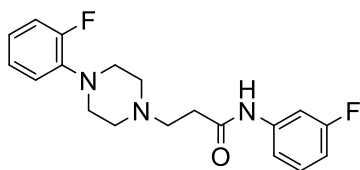

**6**

NDF (D<sub>1</sub>R) = 2.15 ± 1.16  
NDF (D<sub>2</sub>R) = 8.18 ± 3.62  
NDF (D<sub>3</sub>R) = 4.21 ± 0.79

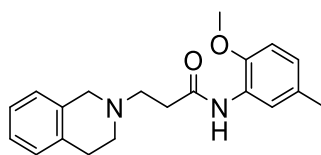

**SC350**

NDF (D<sub>1</sub>R) = 1.19 ± 0.57  
NDF (D<sub>2</sub>R) = 1.83 ± 0.83  
NDF (D<sub>3</sub>R) = 3.25 ± 0.47

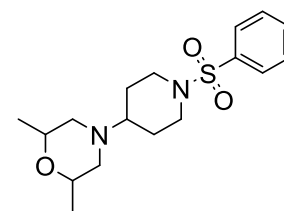

**SC351**

NDF (D<sub>1</sub>R) = 0.93 ± 0.39  
NDF (D<sub>2</sub>R) = 0.99 ± 0.42  
NDF (D<sub>3</sub>R) = 1.19 ± 0.45

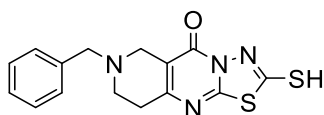

**SC352**

NDF (D<sub>1</sub>R) = 0.91 ± 0.42  
NDF (D<sub>2</sub>R) = 1.02 ± 0.47  
NDF (D<sub>3</sub>R) = 1.22 ± 0.38

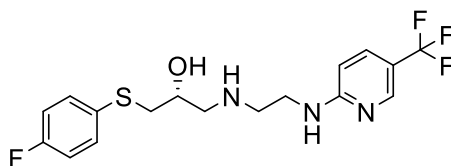

**7**

NDF (D<sub>1</sub>R) = 1.57 ± 0.54  
NDF (D<sub>2</sub>R) = 10.85 ± 4.93  
NDF (D<sub>3</sub>R) = 3.79 ± 0.70

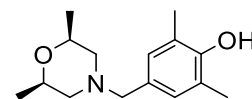

**SC353**

NDF (D<sub>1</sub>R) = 1.08 ± 0.61  
NDF (D<sub>2</sub>R) = 1.00 ± 0.40  
NDF (D<sub>3</sub>R) = 1.20 ± 0.43

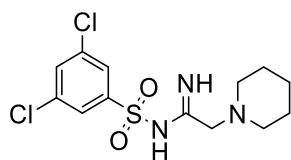

SC354

NDF (D<sub>1</sub>R) = 0.98 ± 0.52  
NDF (D<sub>2</sub>R) = 0.99 ± 0.39  
NDF (D<sub>3</sub>R) = 1.06 ± 0.24

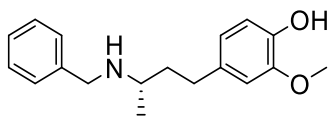

8

NDF (D<sub>1</sub>R) = 1.20 ± 0.59  
NDF (D<sub>2</sub>R) = 1.10 ± 0.52  
NDF (D<sub>3</sub>R) = 2.63 ± 0.52

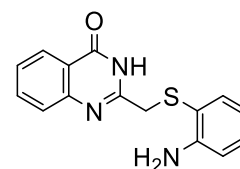

SC355

NDF (D<sub>1</sub>R) = 1.34 ± 1.14  
NDF (D<sub>2</sub>R) = 1.13 ± 0.34  
NDF (D<sub>3</sub>R) = 1.22 ± 0.35

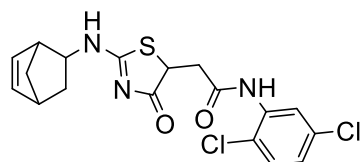

SC356

NDF (D<sub>1</sub>R) = 1.28 ± 0.99  
NDF (D<sub>2</sub>R) = 2.44 ± 1.39  
NDF (D<sub>3</sub>R) = 1.23 ± 0.29

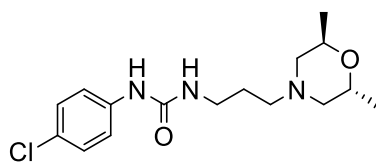

SC357

NDF (D<sub>1</sub>R) = 1.05 ± 0.57  
NDF (D<sub>2</sub>R) = 1.66 ± 1.60  
NDF (D<sub>3</sub>R) = 2.02 ± 0.83

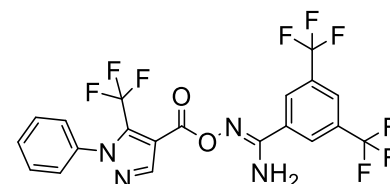

SC358

NDF (D<sub>1</sub>R) = 1.33 ± 0.55  
NDF (D<sub>2</sub>R) = 1.11 ± 0.47  
NDF (D<sub>3</sub>R) = 1.22 ± 0.53

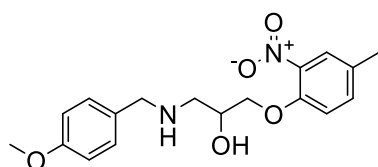

SC359

NDF (D<sub>1</sub>R) = 1.28 ± 0.73  
NDF (D<sub>2</sub>R) = 2.00 ± 0.85  
NDF (D<sub>3</sub>R) = 2.49 ± 0.74

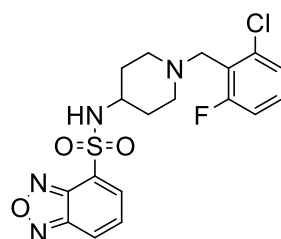

SC360

NDF (D<sub>1</sub>R) = 1.05 ± 0.56  
NDF (D<sub>2</sub>R) = 0.93 ± 0.40  
NDF (D<sub>3</sub>R) = 1.35 ± 0.33

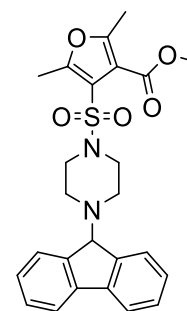

SC361

NDF (D<sub>1</sub>R) = 0.96 ± 0.52  
NDF (D<sub>2</sub>R) = 1.11 ± 0.51  
NDF (D<sub>3</sub>R) = 1.10 ± 0.24

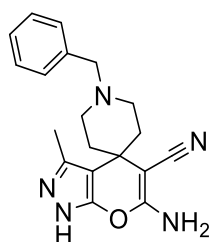

SC362

NDF (D<sub>1</sub>R) = 1.05 ± 0.36  
NDF (D<sub>2</sub>R) = 1.41 ± 0.71  
NDF (D<sub>3</sub>R) = 2.03 ± 0.45

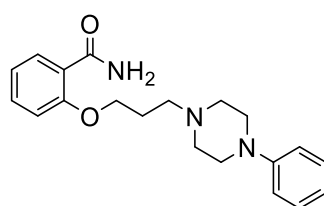

9

NDF (D<sub>1</sub>R) = 1.71 ± 0.86  
NDF (D<sub>2</sub>R) = 22.08 ± 6.62  
NDF (D<sub>3</sub>R) = 3.97 ± 0.78

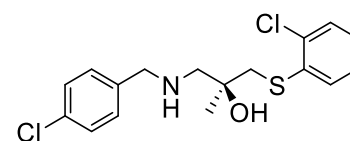

SC363

NDF (D<sub>1</sub>R) = 1.11 ± 0.70  
NDF (D<sub>2</sub>R) = 1.11 ± 0.53  
NDF (D<sub>3</sub>R) = 1.53 ± 0.21

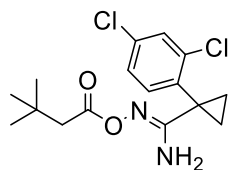

**SC364**

NDF (D<sub>1</sub>R) = 0.92 ± 0.42  
 NDF (D<sub>2</sub>R) = 1.08 ± 0.56  
 NDF (D<sub>3</sub>R) = 1.17 ± 0.37

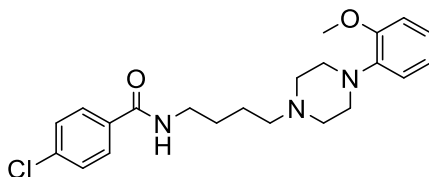

**10**

NDF (D<sub>1</sub>R) = 2.59 ± 1.04  
 NDF (D<sub>2</sub>R) = 22.89 ± 8.41  
 NDF (D<sub>3</sub>R) = 4.09 ± 1.07

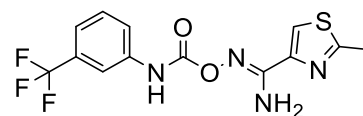

**SC365**

NDF (D<sub>1</sub>R) = 0.99 ± 0.38  
 NDF (D<sub>2</sub>R) = 1.04 ± 0.39  
 NDF (D<sub>3</sub>R) = 1.12 ± 0.14

### 3. In silico assessment of DR subtype selectivity – a distance-based approach

#### 3.1. ChEMBL validation

**Table S6.** Summary of the validation of the distance-based in silico approach using the described datasets extracted from ChEMBL. Cons. Gly, conserved glycine residue within the respective SBP. COM, center of mass.

#### 3.2. Retrospective analysis of investigated compounds

**Table S7.** Summary of the distance-based in silico approach used during the investigation of the binding poses of the selected compounds **1** to **10**. Cpd., compound. Cons. Gly, conserved glycine residue within the respective SBP. COM, center of mass.

| Cpd.      | Pose rank (out of 30) |                  |                  | Distance (cons. Gly – COM) [Å] |                  |                  | Fold-difference (distance-based)  |                                   |                                   |
|-----------|-----------------------|------------------|------------------|--------------------------------|------------------|------------------|-----------------------------------|-----------------------------------|-----------------------------------|
|           | D <sub>1</sub> R      | D <sub>2</sub> R | D <sub>3</sub> R | D <sub>1</sub> R               | D <sub>2</sub> R | D <sub>3</sub> R | D <sub>1</sub> R/D <sub>2</sub> R | D <sub>1</sub> R/D <sub>3</sub> R | D <sub>2</sub> R/D <sub>3</sub> R |
| <b>1</b>  | 4 <sup>th</sup>       | 1 <sup>st</sup>  | 5 <sup>th</sup>  | 19.96                          | 17.70            | 16.70            | 1.13                              | 1.19                              | 1.06                              |
| <b>2</b>  | 1 <sup>st</sup>       | 4 <sup>th</sup>  | 1 <sup>st</sup>  | 19.20                          | 14.47            | 14.96            | 1.33                              | 1.28                              | 0.97                              |
| <b>3</b>  | 1 <sup>st</sup>       | 1 <sup>st</sup>  | 1 <sup>st</sup>  | 18.16                          | 13.41            | 14.15            | 1.35                              | 1.28                              | 0.95                              |
| <b>4</b>  | 1 <sup>st</sup>       | 2 <sup>nd</sup>  | 1 <sup>st</sup>  | 17.70                          | 15.42            | 14.06            | 1.15                              | 1.26                              | 1.10                              |
| <b>5</b>  | 1 <sup>st</sup>       | 6 <sup>th</sup>  | 4 <sup>th</sup>  | 18.73                          | 13.95            | 14.31            | 1.34                              | 1.31                              | 0.98                              |
| <b>6</b>  | 1 <sup>st</sup>       | 1 <sup>st</sup>  | 2 <sup>nd</sup>  | 17.12                          | 14.77            | 15.14            | 1.16                              | 1.13                              | 0.98                              |
| <b>7</b>  | 1 <sup>st</sup>       | 2 <sup>nd</sup>  | 2 <sup>nd</sup>  | 18.32                          | 12.99            | 14.05            | 1.41                              | 1.30                              | 0.93                              |
| <b>8</b>  | 1 <sup>st</sup>       | 1 <sup>st</sup>  | 7 <sup>th</sup>  | 19.27                          | 16.45            | 15.77            | 1.17                              | 1.22                              | 1.04                              |
| <b>9</b>  | 2 <sup>nd</sup>       | 2 <sup>nd</sup>  | 2 <sup>nd</sup>  | 19.29                          | 12.83            | 14.07            | 1.50                              | 1.37                              | 0.91                              |
| <b>10</b> | 1 <sup>st</sup>       | 1 <sup>st</sup>  | 1 <sup>st</sup>  | 18.11                          | 12.84            | 13.50            | 1.41                              | 1.34                              | 0.95                              |

#### 4. In vitro careening activity of selected compounds

##### 4.1. Summary of in vitro activity (based on NDF values) of control compounds and selected virtual hits

###### Screening results in vitro activity screened at 10 $\mu$ M

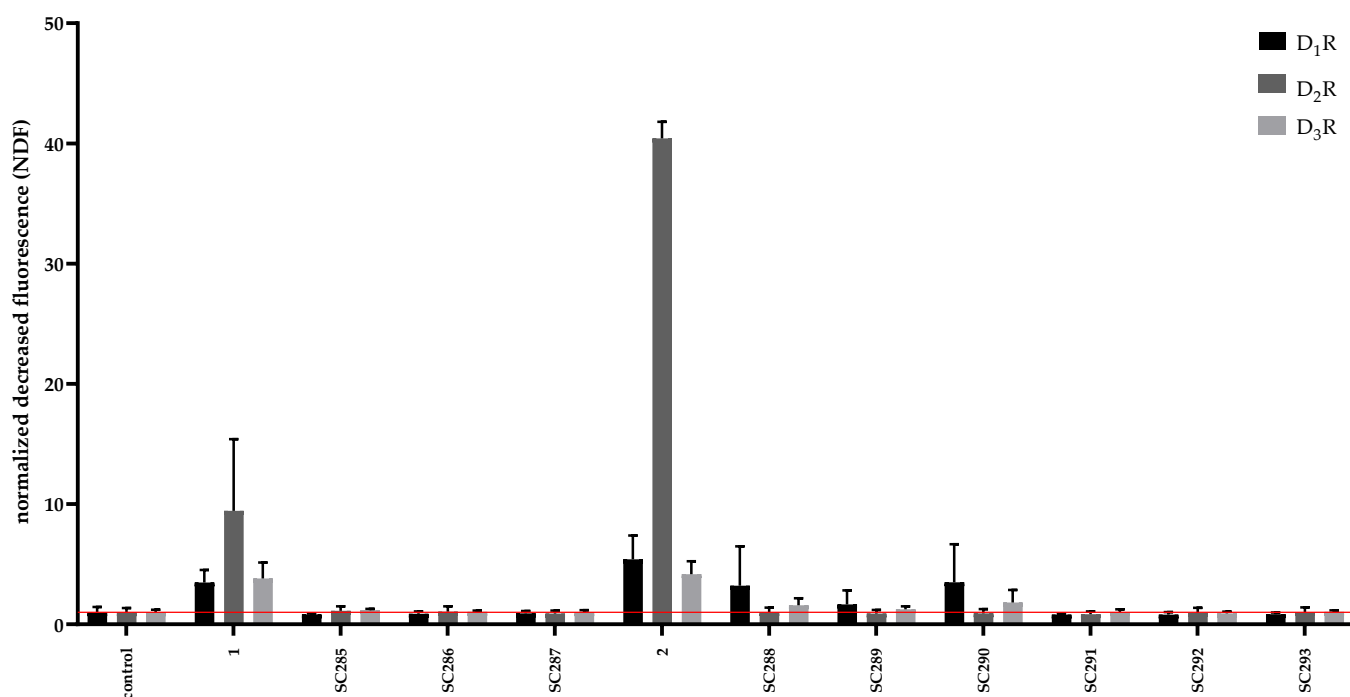

**Figure S1.** Comparison of biological activity of selected compounds at DR subtypes D<sub>1</sub>R (black), D<sub>2</sub>R (dark grey) and D<sub>3</sub>R (light grey). Compound binding is shown as NDF in comparison to the control. Activities were measured in biological duplicates (two technical replicates each). Error bars show standard deviations (SD). The red line indicates a NDF of 1, thus, an inactive ligand at 10  $\mu$ M screening concentration. NDF, normalized decreased fluorescence.

Screening results  
in vitro activity screened at 10  $\mu$ M

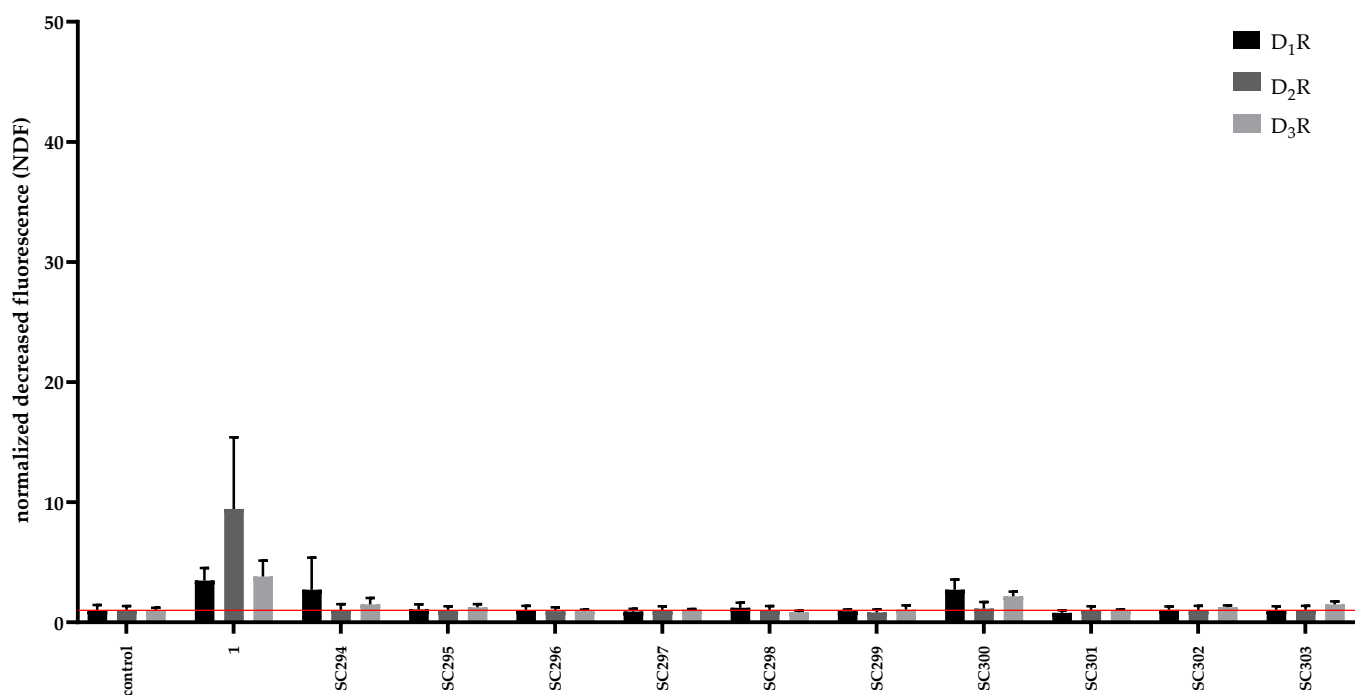

**Figure S2.** Comparison of biological activity of selected compounds at DR subtypes D<sub>1</sub>R (black), D<sub>2</sub>R (dark grey) and D<sub>3</sub>R (light grey). Compound binding is shown as NDF in comparison to the control. Activities were measured in biological duplicates (two technical replicates each). Error bars show standard deviations (SD). The red line indicates a NDF of 1, thus, an inactive ligand at 10  $\mu$ M screening concentration. NDF, normalized decreased fluorescence.

Screening results  
in vitro activity screened at 10  $\mu$ M

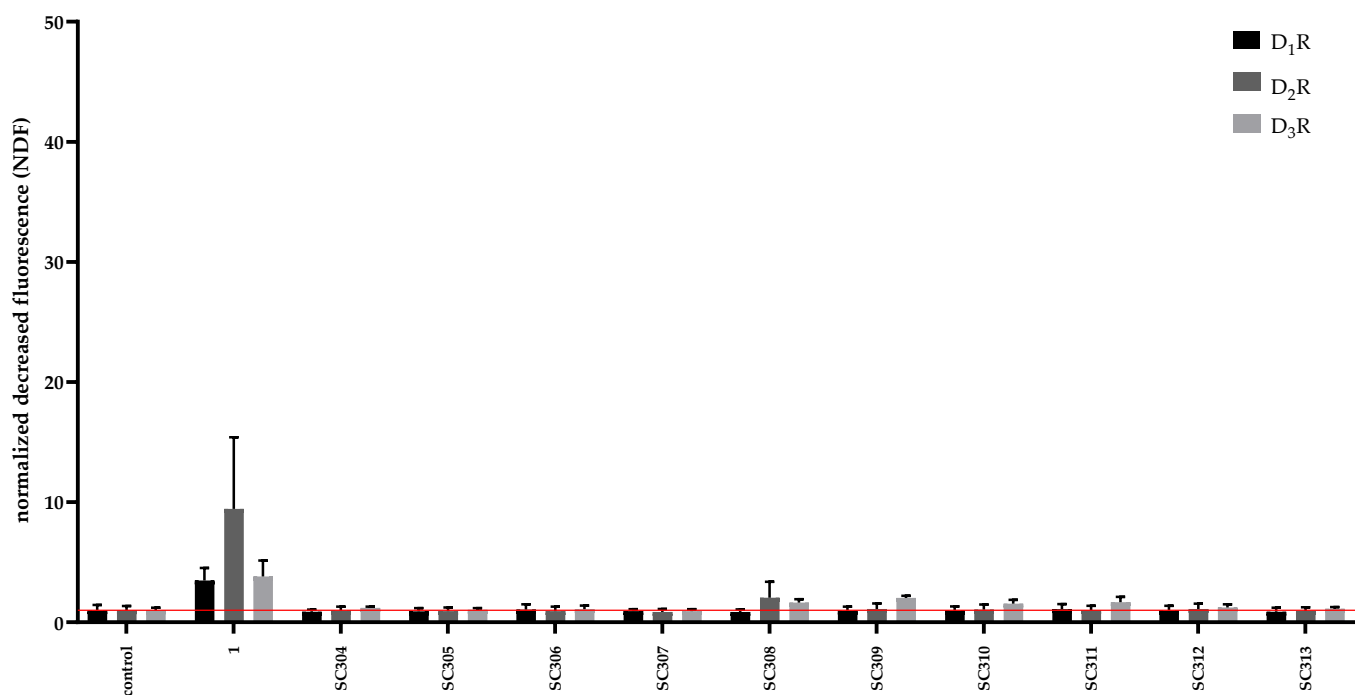

**Figure S3.** Comparison of biological activity of selected compounds at DR subtypes D<sub>1</sub>R (black), D<sub>2</sub>R (dark grey) and D<sub>3</sub>R (light grey). Compound binding is shown as NDF in comparison to the control. Activities were measured in biological duplicates (two technical replicates each). Error bars show standard deviations (SD). The red line indicates a NDF of 1, thus, an inactive ligand at 10  $\mu$ M screening concentration. NDF, normalized decreased fluorescence.

**Screening results**  
in vitro activity screened at 10  $\mu$ M

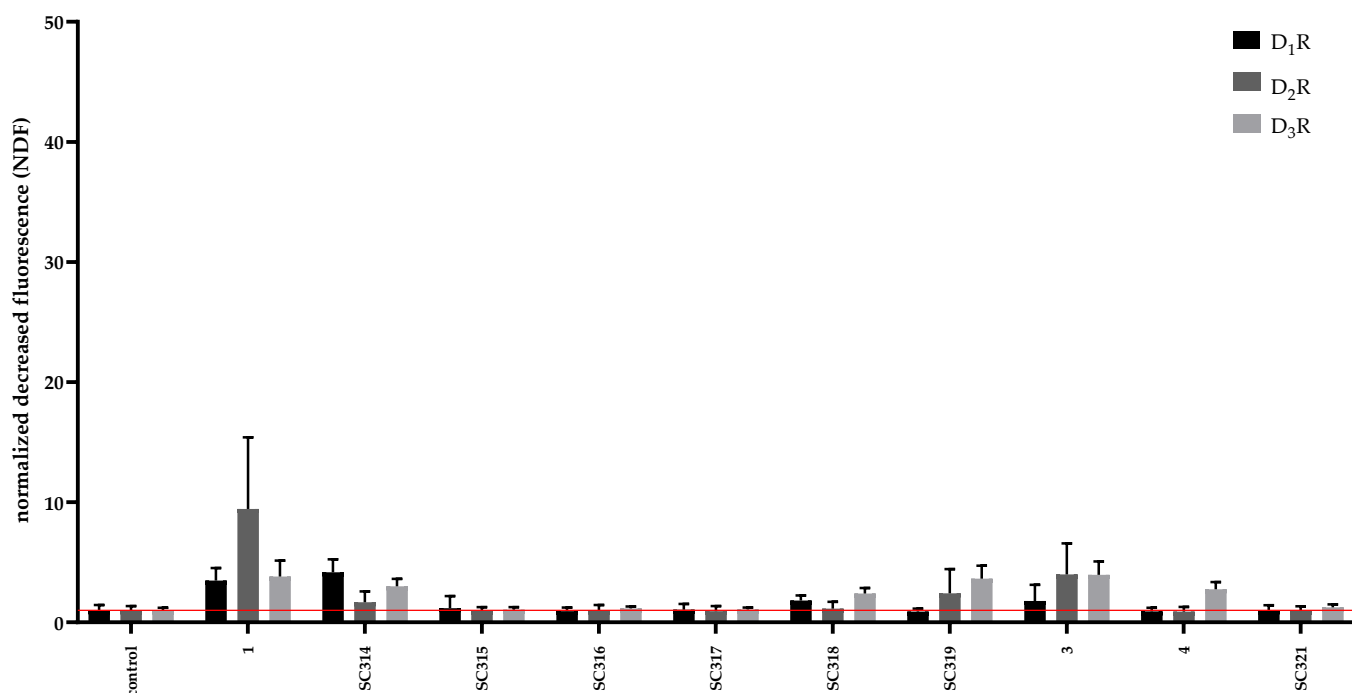

**Figure S4.** Comparison of biological activity of selected compounds at DR subtypes D<sub>1</sub>R (black), D<sub>2</sub>R (dark grey) and D<sub>3</sub>R (light grey). Compound binding is shown as NDF in comparison to the control. Activities were measured in biological duplicates (two technical replicates each). Error bars show standard deviations (SD). The red line indicates a NDF of 1, thus, an inactive ligand at 10  $\mu$ M screening concentration. NDF, normalized decreased fluorescence.

**Screening results**  
in vitro activity screened at 10  $\mu$ M

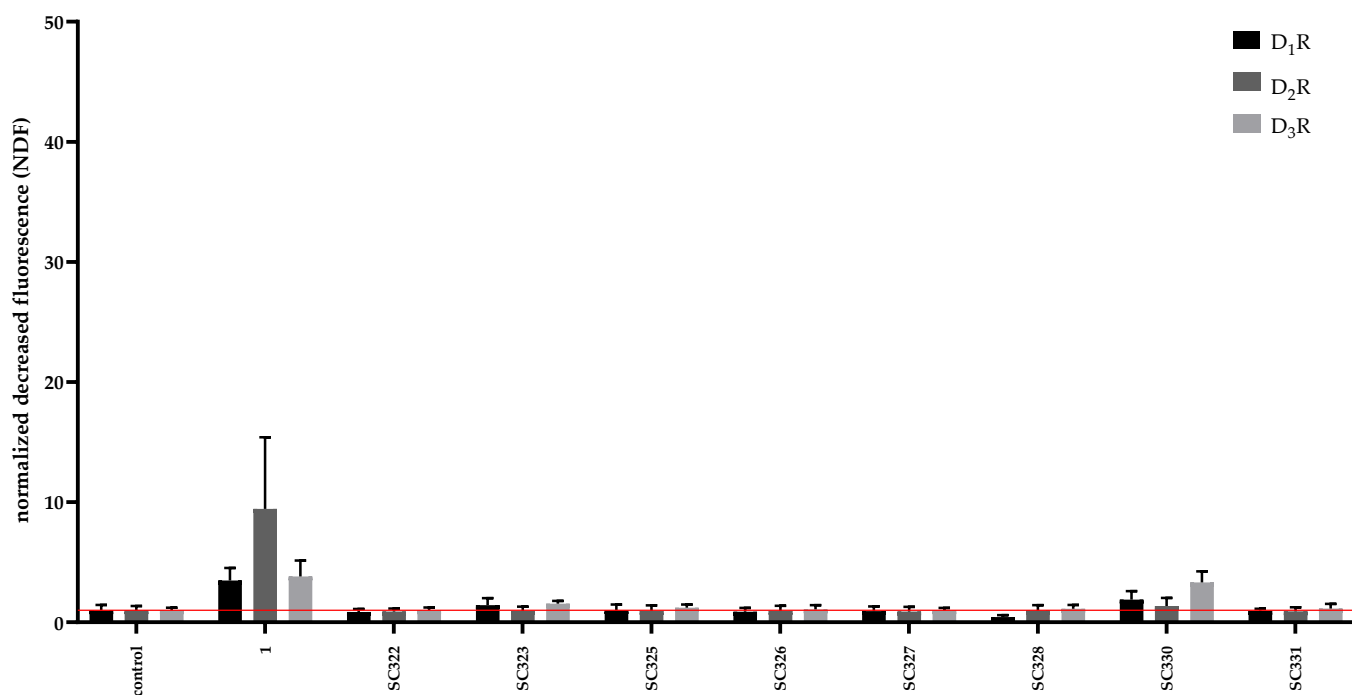

**Figure S5.** Comparison of biological activity of selected compounds at DR subtypes D<sub>1</sub>R (black), D<sub>2</sub>R (dark grey) and D<sub>3</sub>R (light grey). Compound binding is shown as NDF in comparison to the control. Activities were measured in biological duplicates (two technical replicates each). Error bars show standard deviations (SD). The red line indicates a NDF of 1, thus, an inactive ligand at 10  $\mu$ M screening concentration. NDF, normalized decreased fluorescence.

**Screening results**  
**in vitro activity screened at 10  $\mu$ M**

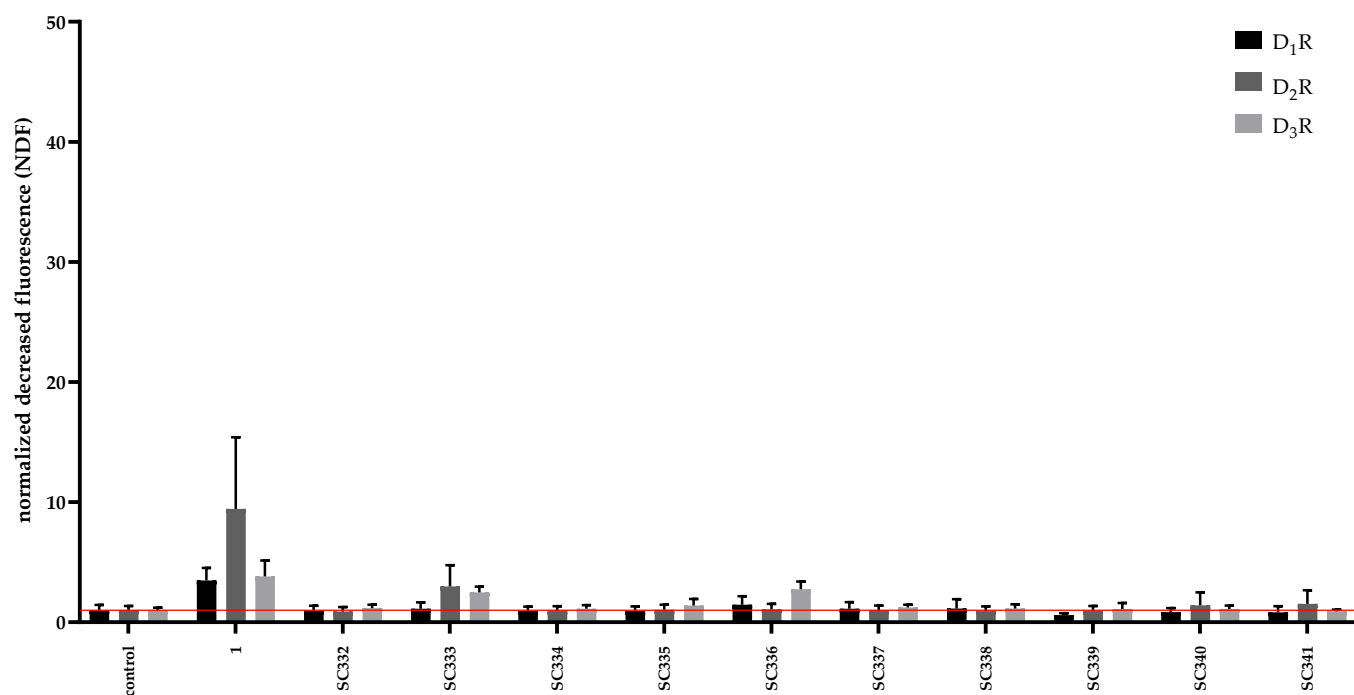

**Figure S6.** Comparison of biological activity of selected compounds at DR subtypes D<sub>1</sub>R (black), D<sub>2</sub>R (dark grey) and D<sub>3</sub>R (light grey). Compound binding is shown as NDF in comparison to the control. Activities were measured in biological duplicates (two technical replicates each). Error bars show standard deviations (SD). The red line indicates a NDF of 1, thus, an inactive ligand at 10  $\mu$ M screening concentration. NDF, normalized decreased fluorescence.

**Screening results**  
**in vitro activity screened at 10  $\mu$ M**

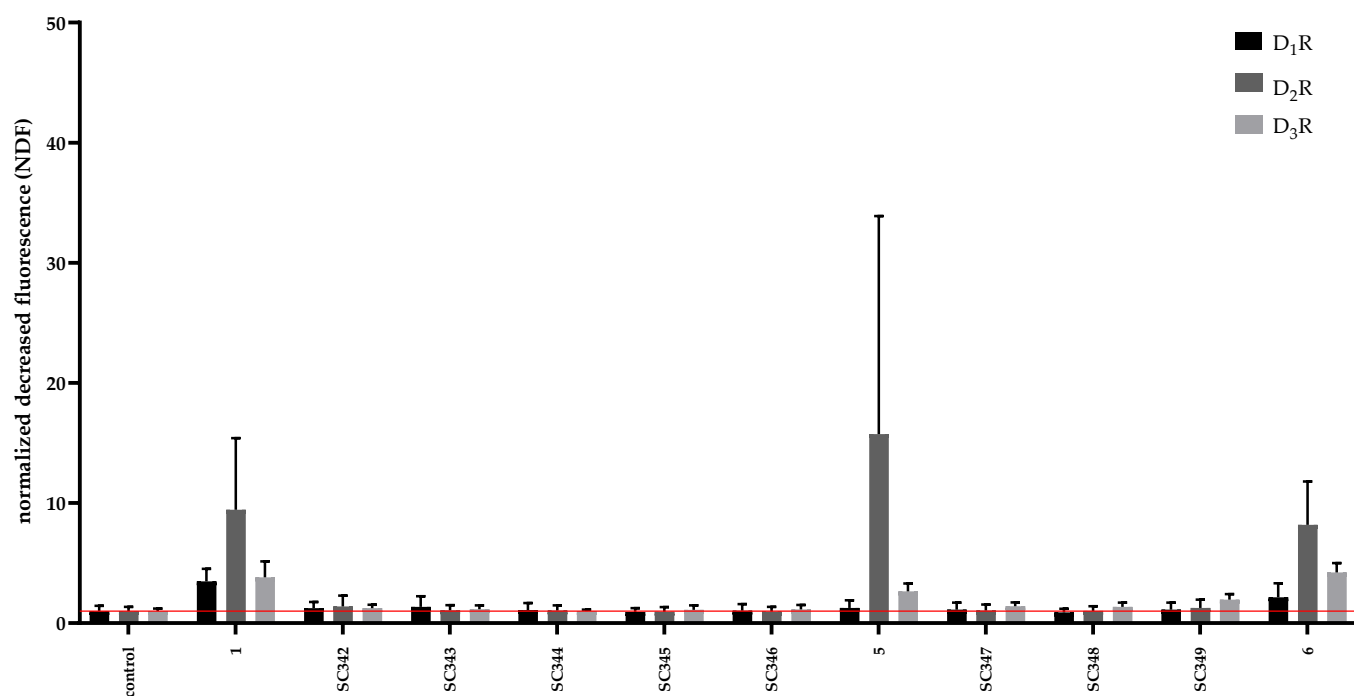

**Figure S7.** Comparison of biological activity of selected compounds at DR subtypes D<sub>1</sub>R (black), D<sub>2</sub>R (dark grey) and D<sub>3</sub>R (light grey). Compound binding is shown as NDF in comparison to the control. Activities were measured in biological duplicates (two technical replicates each). Error bars show standard deviations (SD). The red line indicates a NDF of 1, thus, an inactive ligand at 10  $\mu$ M screening concentration. NDF, normalized decreased fluorescence.

**Screening results**  
in vitro activity screened at 10  $\mu$ M

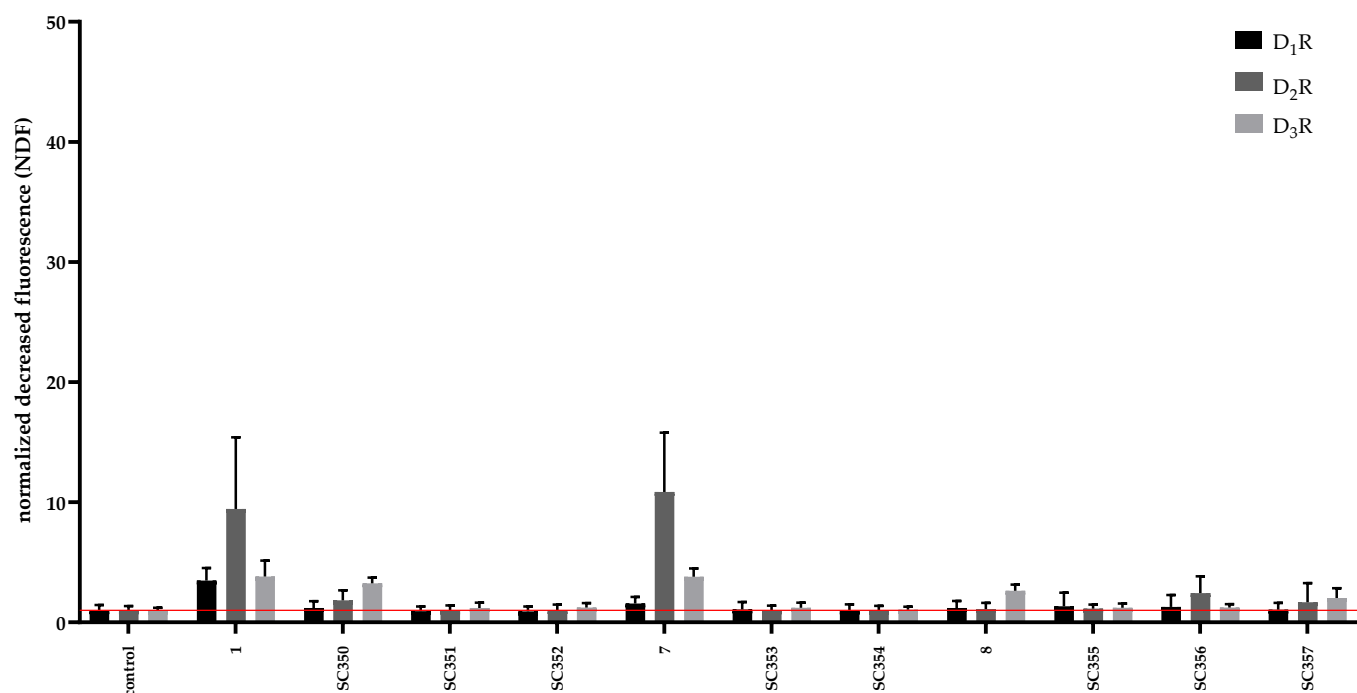

**Figure S8.** Comparison of biological activity of selected compounds at DR subtypes D<sub>1</sub>R (black), D<sub>2</sub>R (dark grey) and D<sub>3</sub>R (light grey). Compound binding is shown as NDF in comparison to the control. Activities were measured in biological duplicates (two technical replicates each). Error bars show standard deviations (SD). The red line indicates a NDF of 1, thus, an inactive ligand at 10  $\mu$ M screening concentration. NDF, normalized decreased fluorescence.

**Screening results**  
in vitro activity screened at 10  $\mu$ M

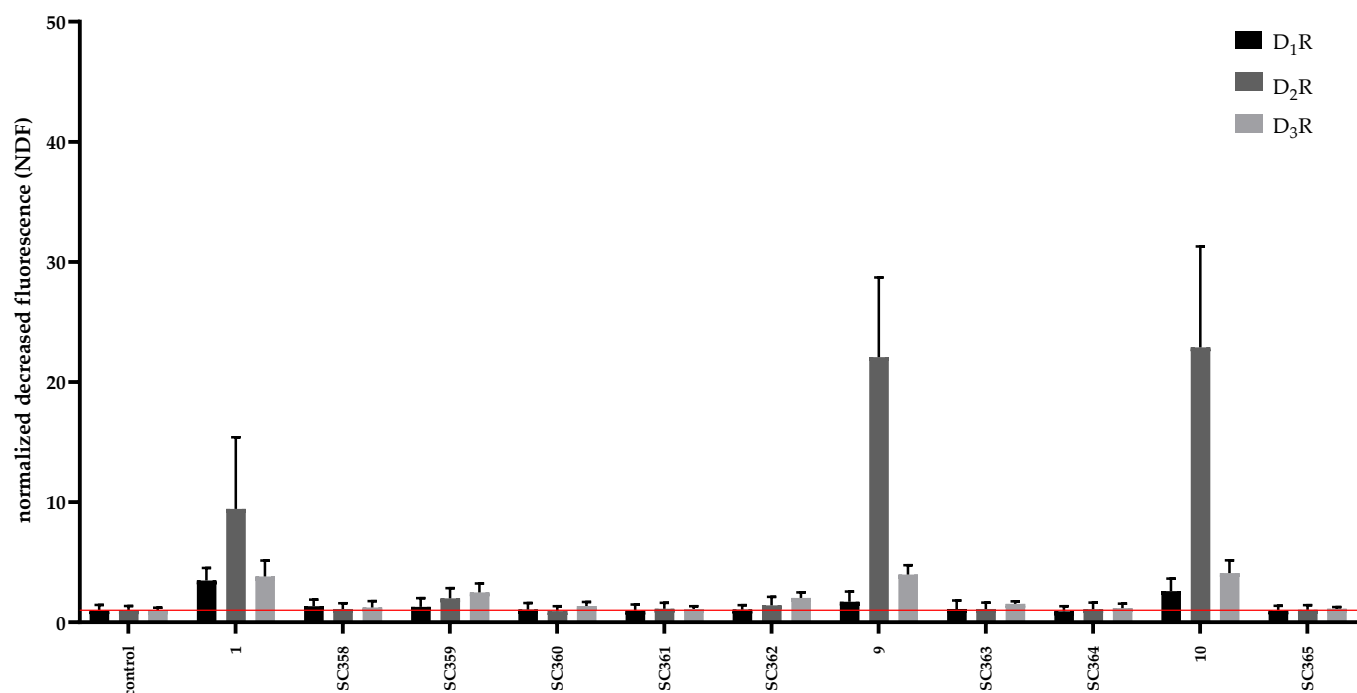

**Figure S9.** Comparison of biological activity of selected compounds at DR subtypes D<sub>1</sub>R (black), D<sub>2</sub>R (dark grey) and D<sub>3</sub>R (light grey). Compound binding is shown as NDF in comparison to the control. Activities were measured in biological duplicates (two technical replicates each). Error bars show standard deviations (SD). The red line indicates a NDF of 1, thus, an inactive ligand at 10  $\mu$ M screening concentration. NDF, normalized decreased fluorescence.

#### 4.2. Summary of $K_1$ values determined *in vitro* – overview of DR subtype selectivity

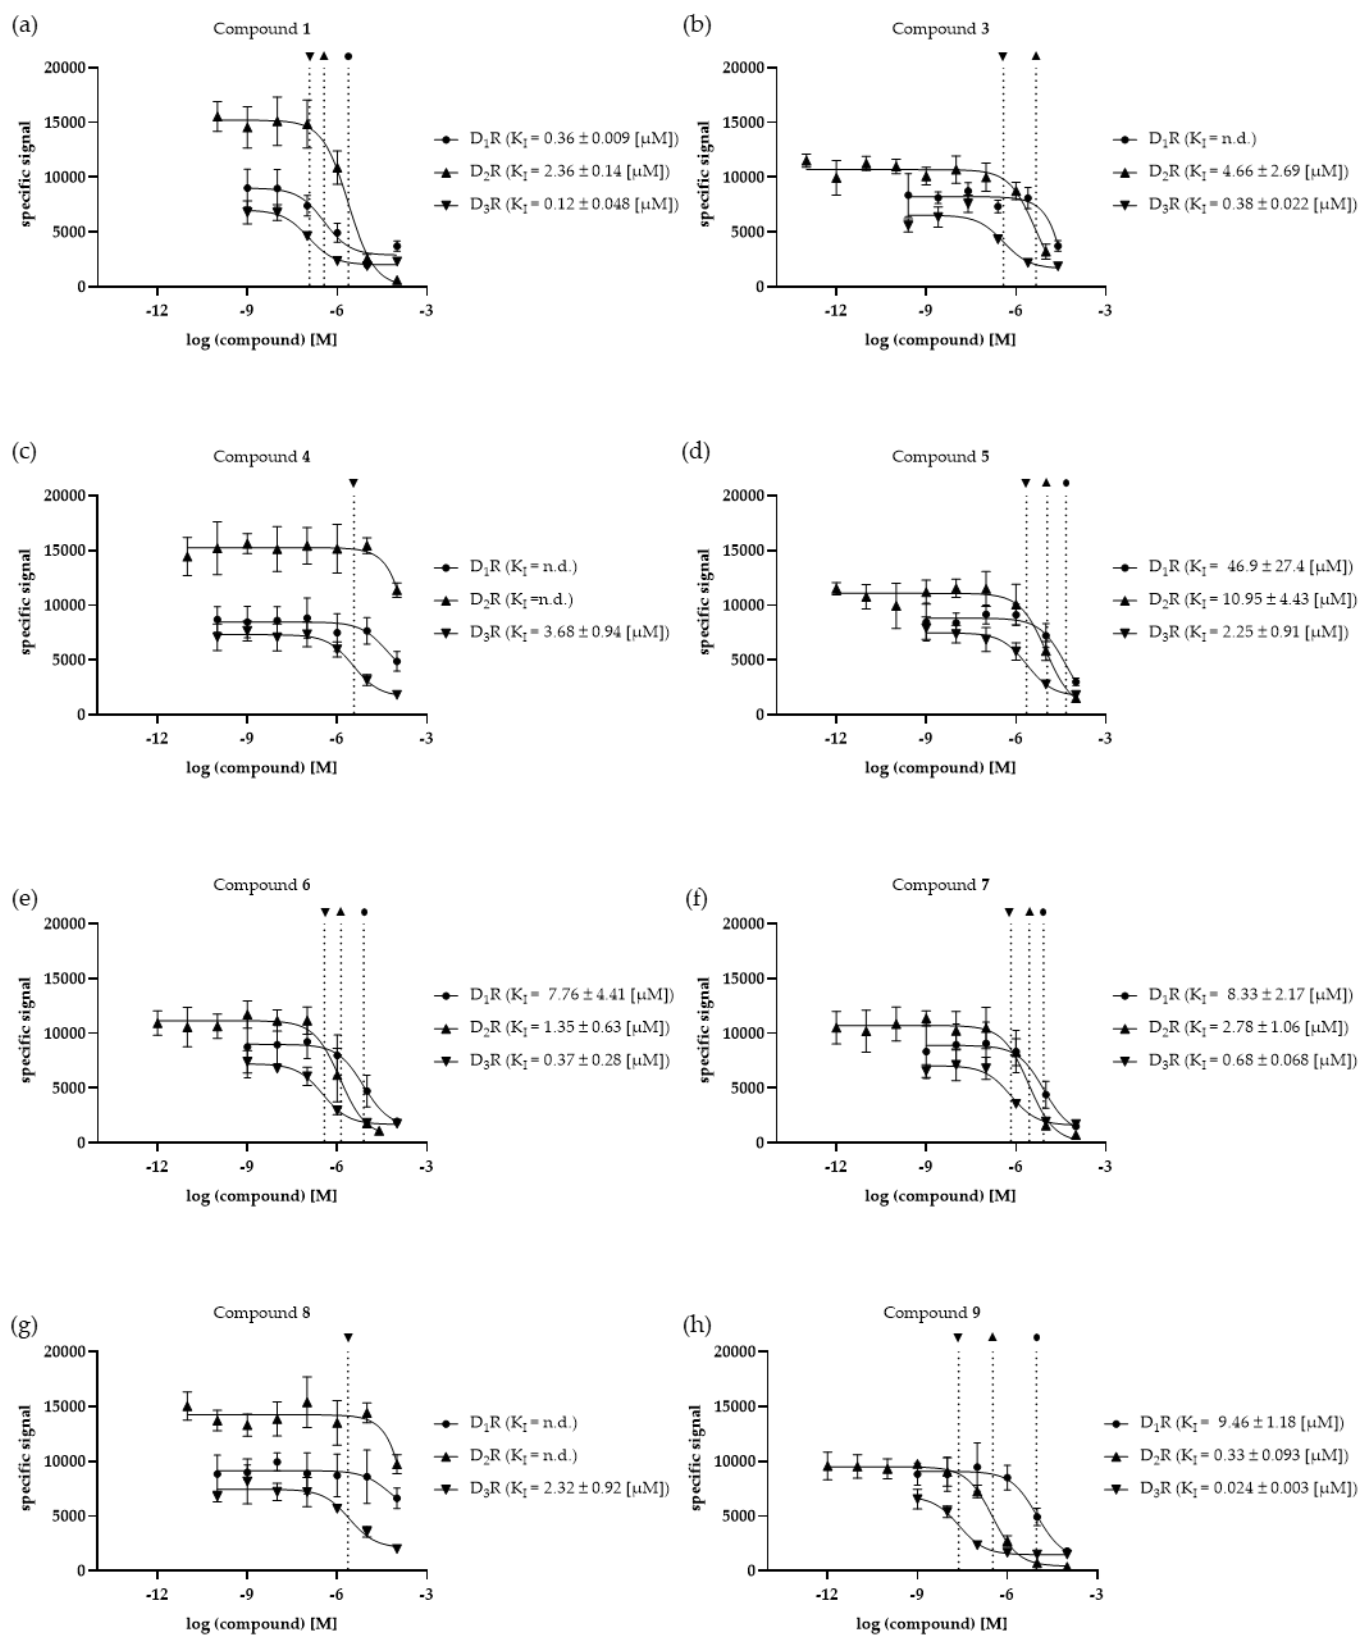

**Figure S10.** Comparison of the  $K_1$  values of compounds (a) 1, (b) 3, (c) 4, (d) 5, (e) 6, (f) 7, (g) 8 and (h) 9 determined at the investigated DR subtypes D<sub>1</sub>R, D<sub>2</sub>R and D<sub>3</sub>R. Vertical, dotted lines indicate the respective  $K_1$  values at the different DR subtypes.  $K_1$  values [μM] ± SD were determined with n = 6.

## 5. In silico insights into the DR binding pockets

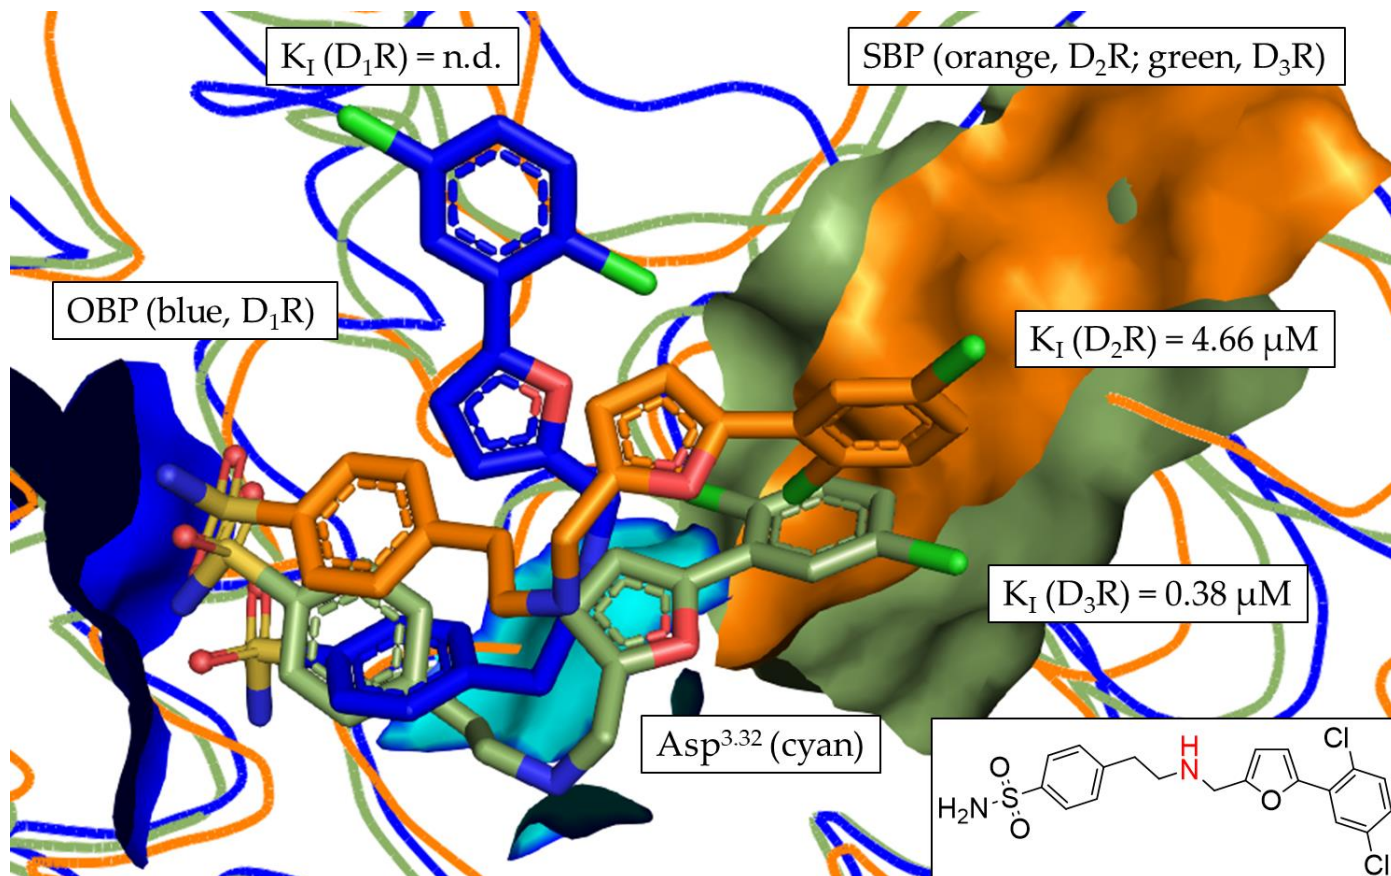

**Figure S11.** Alignment of the most frequent poses of compound **3** docked into  $D_1R$ ,  $D_2R$  and  $D_3R$ . The surface of the highly conserved OBP is shown in blue (based on  $D_1R$ ) consisting of Asp<sup>3.32</sup> (highlighted in cyan) and Ser<sup>5.42/5.43/5.46</sup>. The conserved SBP-surface is displayed in orange ( $D_2R$ ) and green ( $D_3R$ ) consisting of Val<sup>2.61</sup>, Leu<sup>2.64</sup>, Gly<sup>ECL1</sup>, Phe<sup>3.28</sup> and Cys<sup>ECL2</sup> (individual amino acid labels shown in Table 3), respectively.  $K_I$  values determined in vitro are shown for each DR subtype. 2D structure of compound **3** is shown. Amine functional group involved in formation of the salt-bridge is highlighted in red.

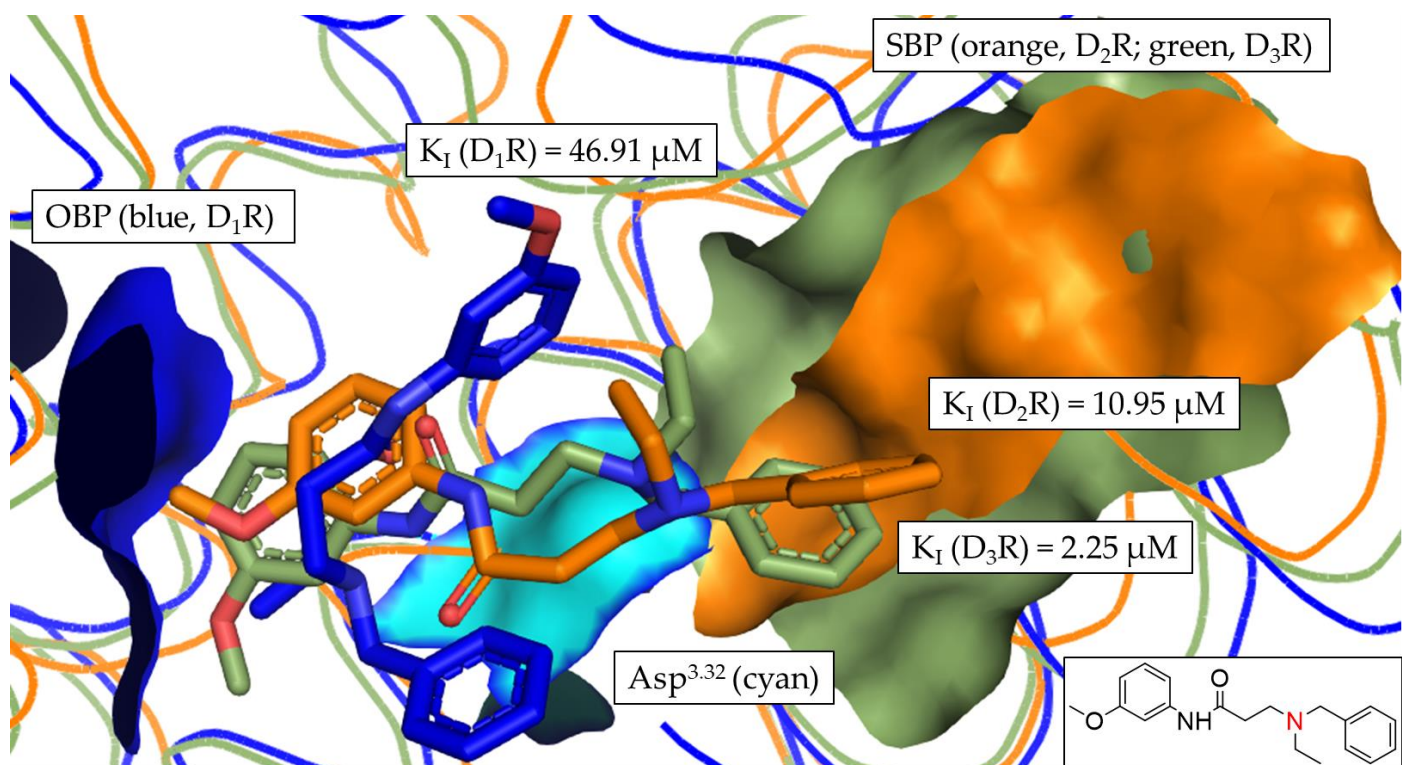

**Figure S12.** Alignment of the most frequent poses of compound 5 docked into D<sub>1</sub>R, D<sub>2</sub>R and D<sub>3</sub>R. The surface of the highly conserved OBP is shown in blue (based on D<sub>1</sub>R) consisting of Asp<sup>3.32</sup> (highlighted in cyan) and Ser<sup>5.42/5.43/5.46</sup>. The conserved SBP-surface is displayed in orange (D<sub>2</sub>R) and green (D<sub>3</sub>R) consisting of Val<sup>2.61</sup>, Leu<sup>2.64</sup>, Gly<sup>ECL1</sup>, Phe<sup>3.28</sup> and Cys<sup>ECL2</sup> (individual amino acid labels shown in Table 3), respectively. K<sub>I</sub> values determined in vitro are shown for each DR subtype. 2D structure of compound 5 is shown. Amine functional group involved in formation of the salt-bridge is highlighted in red.

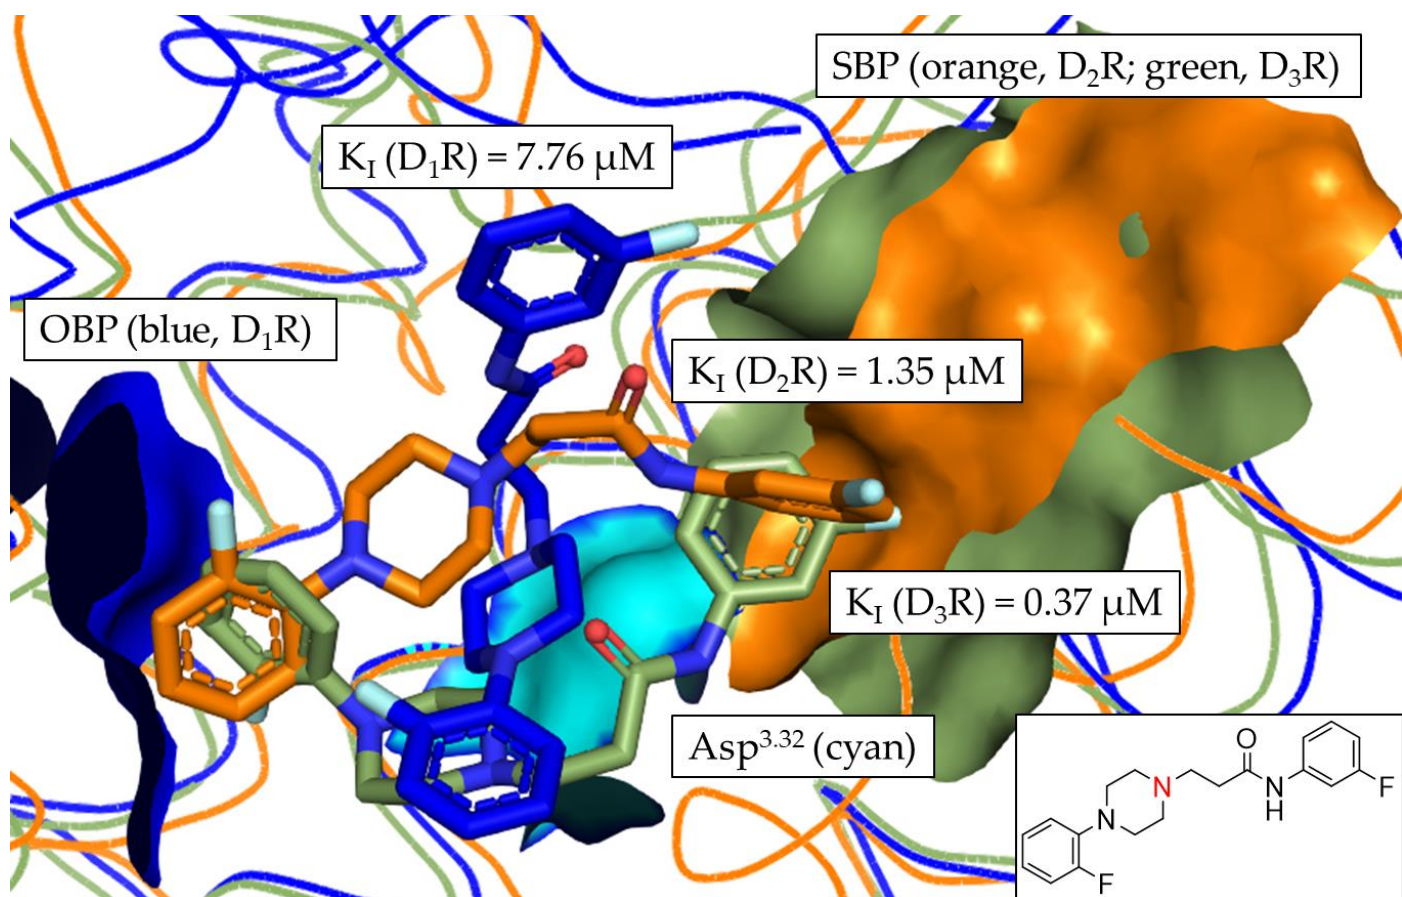

**Figure S13.** Alignment of the most frequent poses of compound 6 docked into D<sub>1</sub>R, D<sub>2</sub>R and D<sub>3</sub>R. The surface of the highly conserved OBP is shown in blue (based on D<sub>1</sub>R) consisting of Asp<sup>3.32</sup> (highlighted in cyan) and Ser<sup>5.42/5.43/5.46</sup>. The conserved SBP-surface is displayed in orange (D<sub>2</sub>R) and green (D<sub>3</sub>R) consisting of Val<sup>2.61</sup>, Leu<sup>2.64</sup>, Gly<sup>ECL1</sup>, Phe<sup>3.28</sup> and Cys<sup>ECL2</sup> (individual amino acid labels shown in Table 3), respectively.  $K_I$  values determined in vitro are shown for each DR subtype. 2D structure of compound 6 is shown. Amine functional group involved in formation of the salt-bridge is highlighted in red.

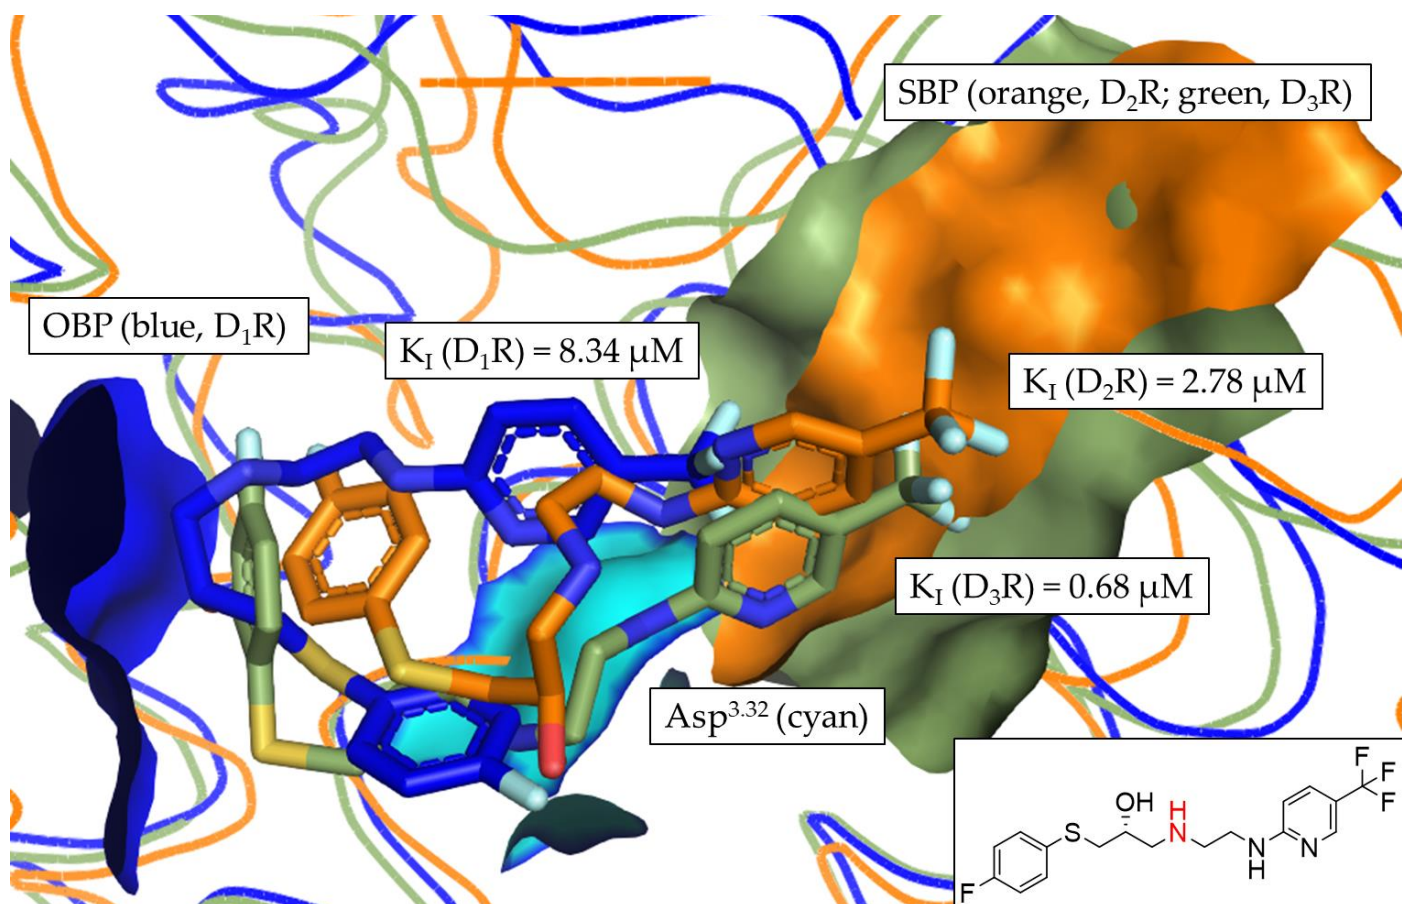

**Figure S14.** Alignment of the most frequent poses of compound **7** docked into D<sub>1</sub>R, D<sub>2</sub>R and D<sub>3</sub>R. The surface of the highly conserved OBP is shown in blue (based on D<sub>1</sub>R) consisting of Asp<sup>3.32</sup> (highlighted in cyan) and Ser<sup>5.42/5.43/5.46</sup>. The conserved SBP-surface is displayed in orange (D<sub>2</sub>R) and green (D<sub>3</sub>R) consisting of Val<sup>2.61</sup>, Leu<sup>2.64</sup>, Gly<sup>ECL1</sup>, Phe<sup>3.28</sup> and Cys<sup>ECL2</sup> (individual amino acid labels shown in Table 3), respectively.  $K_I$  values determined in vitro are shown for each DR subtype. 2D structure of compound **7** is shown. Amine functional group involved in formation of the salt-bridge is highlighted in red.

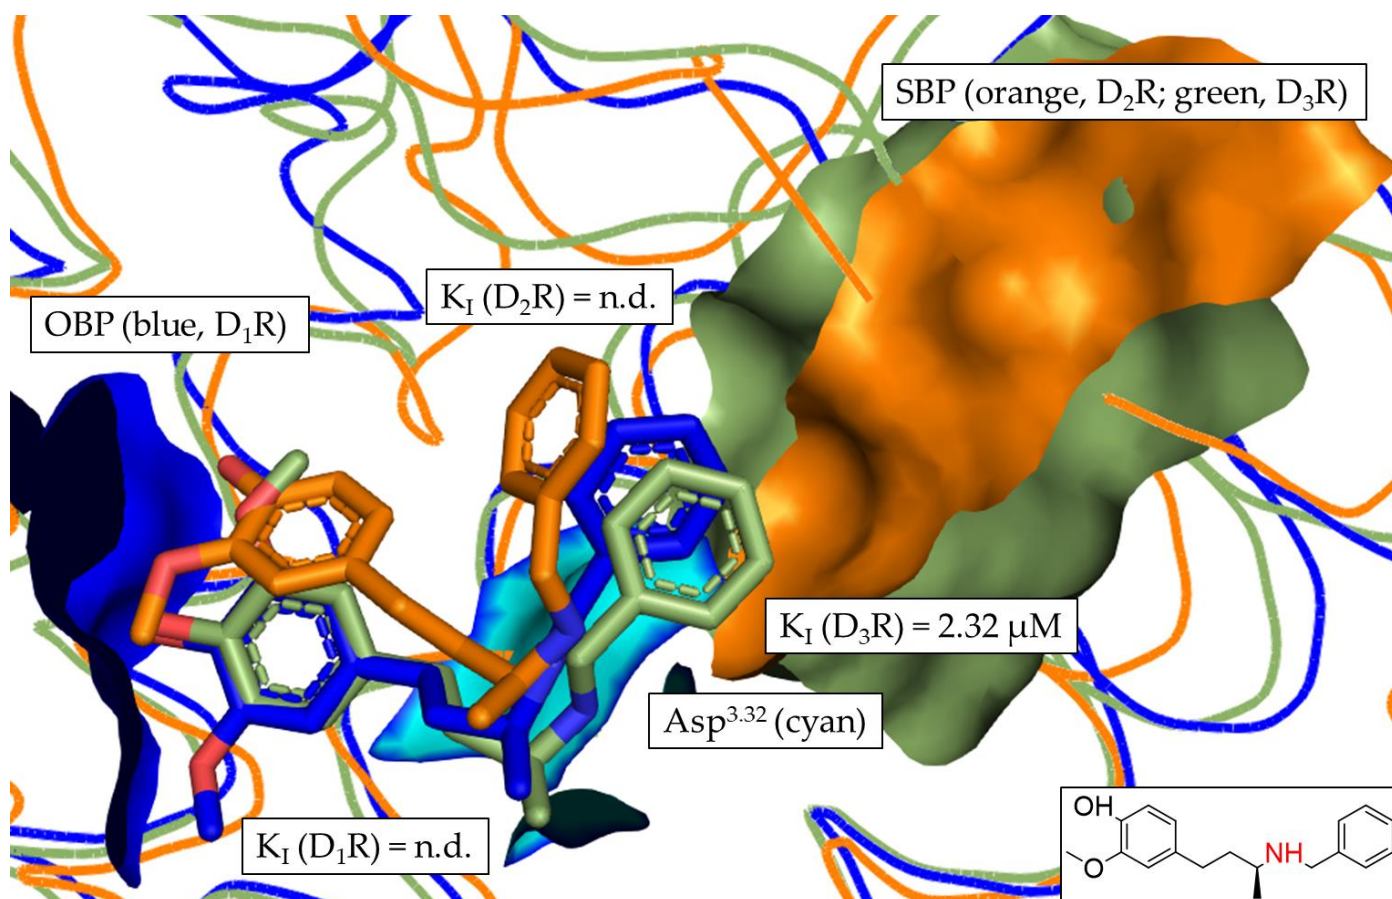

**Figure S15.** Alignment of the most frequent poses of compound **8** docked into D<sub>1</sub>R, D<sub>2</sub>R and D<sub>3</sub>R. The surface of the highly conserved OBP is shown in blue (based on D<sub>1</sub>R) consisting of Asp<sup>3.32</sup> (highlighted in cyan) and Ser<sup>5.42/5.43/5.46</sup>. The conserved SBP-surface is displayed in orange (D<sub>2</sub>R) and green (D<sub>3</sub>R) consisting of Val<sup>2.61</sup>, Leu<sup>2.64</sup>, Gly<sup>ECL1</sup>, Phe<sup>3.28</sup> and Cys<sup>ECL2</sup> (individual amino acid labels shown in Table 3), respectively.  $K_I$  values determined in vitro are shown for each DR subtype. 2D structure of compound **8** is shown. Amine functional group involved in formation of the salt-bridge is highlighted in red.

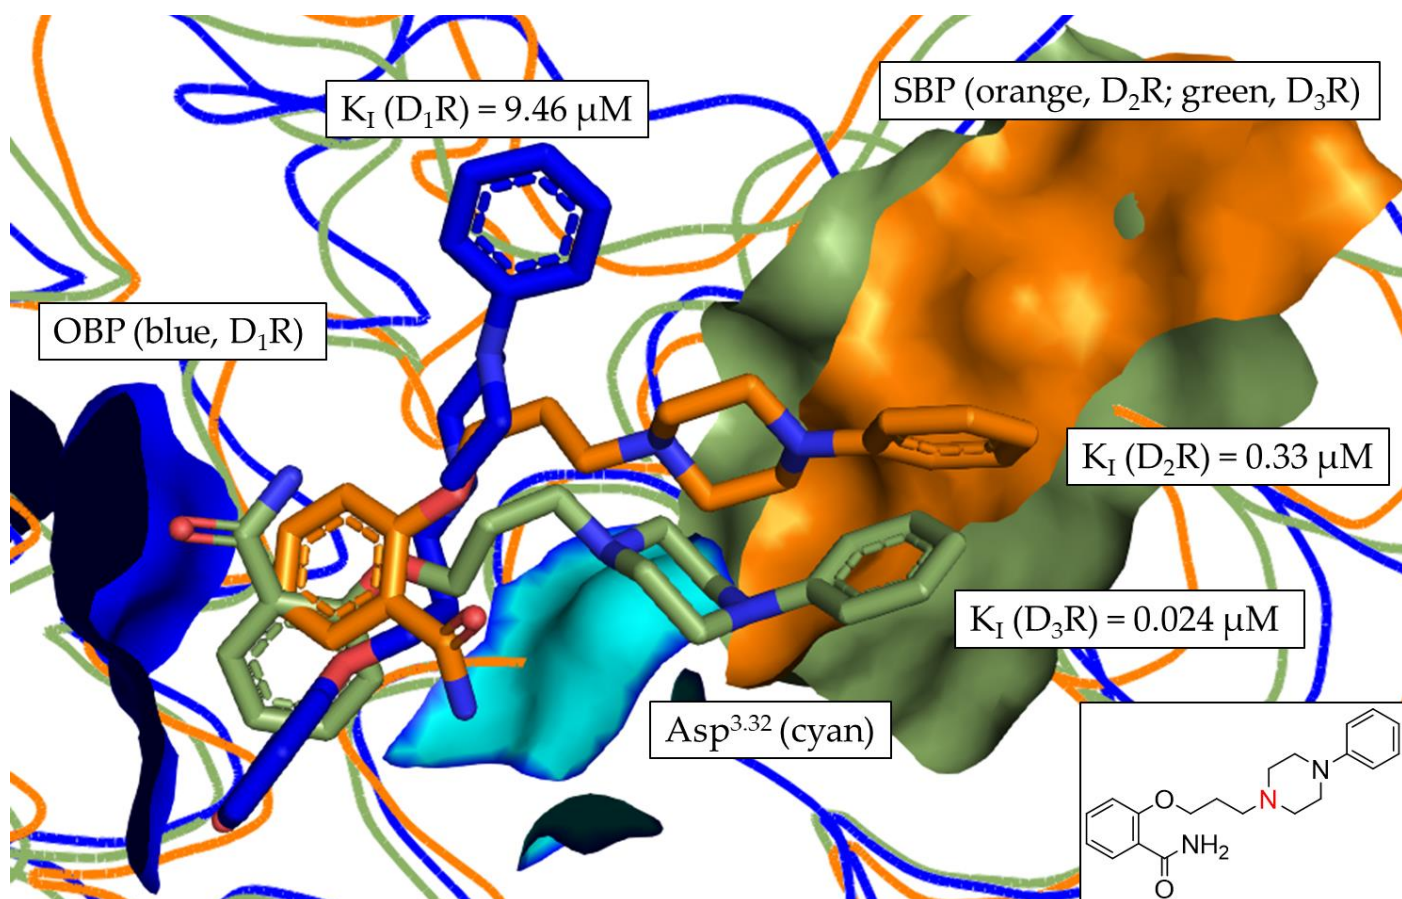

**Figure S16.** Alignment of the most frequent poses of compound **9** docked into  $D_1R$ ,  $D_2R$  and  $D_3R$ . The surface of the highly conserved OBP is shown in blue (based on  $D_1R$ ) consisting of Asp<sup>3.32</sup> (highlighted in cyan) and Ser<sup>5.42/5.43/5.46</sup>. The conserved SBP-surface is displayed in orange ( $D_2R$ ) and green ( $D_3R$ ) consisting of Val<sup>2.61</sup>, Leu<sup>2.64</sup>, Gly<sup>ECL1</sup>, Phe<sup>3.28</sup> and Cys<sup>ECL2</sup> (individual amino acid labels shown in Table 3), respectively.  $K_I$  values determined in vitro are shown for each DR subtype. 2D structure of compound **9** is shown. Amine functional group involved in formation of the salt-bridge is highlighted in red.
